# Supplementary material for: A Sex-Stratified Genome-Wide Association Study of Tuberculosis Using a Multi-Ethnic Genotyping Array
Source: Front Genet. 2019 Jan 18;9:678. doi: 10.3389/fgene.2018.00678 (PMC6346682; doi:10.3389/fgene.2018.00678)
Supplement: Supplementary file 2 [file Data_Sheet_2.xlsx]

## Sheet: combX_candidate_gene_assoc
Gene	Chromosome	SNP	position_b37	A1	Combined		Males		Females
					OR	P-value	OR	P-value	OR	P-value
LOC105373153	23	X:33744007	33744007	T	0.02816	0.9775	688000000	0.9985	1.023	0.9715
LOC105373153	23	X:33750318	33750318	G	0.3927	0.6946	1.503	0.3591	0.9336	0.7793
LOC105373153	23	X:33758386	33758386	T	-1.779	0.07532	0.5995	0.05468	0.8929	0.4949
LOC105373153	23	X:33767075	33767075	C	-1.826	0.06786	0.2195	0.1107	0.49	0.3026
LOC105373153	23	X:33780058	33780058	A	0.1691	0.8657	2.121	0.1869	0.6866	0.3528
LOC105373153	23	X:33783471	33783471	G	0.2767	0.782	2.142	0.1809	0.721	0.4224
LOC105373153	23	X:33789232	33789232	A	0.3907	0.696	0.6475	0.2693	1.402	0.1376
LOC105373153	23	X:33793623	33793623	C	-0.4018	0.6879	1.583	0.6861	0.6205	0.3751
LOC105373153	23	X:33802650	33802650	T	0.2589	0.7957	0.8728	0.6079	1.128	0.4281
LOC105373153	23	X:33814574	33814574	T	-3.18	0.001471	0.1913	0.00538	0.4546	0.07327
LOC105373153	23	X:33818447	33818447	G	0.2955	0.7676	1.094	0.8314	1.049	0.8365
LOC105373153	23	X:33825645	33825645	T	0.9147	0.3603	0.7227	0.4183	1.585	0.05452
LOC105373153	23	X:33827379	33827379	C	1.33	0.1835	1.145	0.6077	1.237	0.1875
LOC105373153	23	X:33848907	33848907	A	0.8613	0.3891	1.207	0.584	1.138	0.5059
LOC105373153	23	X:33856375	33856375	G	-1.837	0.0662	0.8888	0.7437	0.6429	0.03121
LOC105373153	23	X:33862700	33862700	G	1.263	0.2064	1.357	0.5703	1.376	0.2372
LOC105373153	23	X:33864930	33864930	T	0.9615	0.3363	5.848	0.1133	0.9574	0.9146
LOC105373153	23	X:33875757	33875757	G	-1.088	0.2768	0.5818	0.1577	0.9537	0.8341
LOC105373153	23	X:33889705	33889705	G	-1.076	0.282	0.5749	0.1566	0.9553	0.8489
LOC105373153	23	X:33892157	33892157	T	-0.06456	0.9485	0.9017	0.8304	1.027	0.9192
LOC105373153	23	X:33901131	33901131	A	-0.1167	0.9071	0.9775	0.9674	0.96	0.905
LOC105373153	23	X:33906877	33906877	G	-0.8998	0.3682	0.6138	0.211	0.9736	0.9189
LOC105373153	23	X:33907073	33907073	C	2.159	0.03087	1.794	0.08982	1.299	0.1662
LOC105373153	23	X:33907665	33907665	A	0.2168	0.8283	0.8972	0.9351	1.263	0.7194
LOC105373153	23	X:33912870	33912870	G	-2.155	0.03119	0.9222	0.743	0.6798	0.01002
LOC105373153	23	X:33916236	33916236	T	-0.775	0.4384	1.091	0.79	0.7649	0.2069
LOC105373153	23	X:33918283	33918283	G	-1.235	0.217	0.5486	0.07572	0.9822	0.9305
LOC105373153	23	X:33923172	33923172	T	-0.1698	0.8652	0.789	0.7491	1.022	0.9569
LOC105373153	23	X:33929222	33929222	G	0.8866	0.3753	0.962	0.8916	1.236	0.1947
LOC105373153	23	X:33943613	33943613	T	0.8412	0.4002	1.481	0.1199	0.9639	0.8085
LOC105373153	23	X:33943776	33943776	T	2.1	0.03574	2.255	0.03575	1.223	0.3403
LOC105373153	23	X:33948677	33948677	G	0.6855	0.4931	1.099	0.7613	1.118	0.519
LOC105373153	23	X:33958370	33958370	T	-0.7881	0.4307	1.557	0.5892	0.4051	0.1288
LOC105373153	23	X:33961764	33961764	C	1.193	0.2327	1.041	0.8843	1.253	0.1448
LOC105373153	23	X:33962051	33962051	A	1.133	0.2574	1.122	0.6662	1.191	0.2597
LOC105373153	23	X:33962676	33962676	C	0.8191	0.4127	1.053	0.8539	1.152	0.3539
LOC105373153	23	X:33998819	33998819	C	1.062	0.2883	1.077	0.7874	1.207	0.2401
LOC105373153	23	X:34031921	34031921	C	-1.291	0.1967	0.3101	0.01562	1.12	0.6901
LOC105373153	23	X:34033774	34033774	C	-1.012	0.3116	0.4671	0.05199	1.093	0.7227
LOC105373153	23	X:34035592	34035592	C	-1.777	0.07557	0.2736	0.1102	0.6632	0.3351
LOC105373153	23	X:34039075	34039075	T	-1.476	0.14	0.8687	0.6311	0.7481	0.1235
LOC105373153	23	X:34042283	34042283	G	1.192	0.2334	1.192	0.5309	1.172	0.3007
LOC105373153	23	X:34045676	34045676	T	0.7579	0.4485	4.4	0.2097	0.9444	0.9282
LOC105373153	23	X:34046059	34046059	A	-0.2682	0.7885	1.185	0.6056	0.8601	0.4193
LOC105373153	23	X:34046746	34046746	G	-0.3278	0.7431	0.6597	0.4496	1.074	0.8215
LOC105373153	23	X:34047330	34047330	G	1.774	0.07611	2.566	0.03318	1.116	0.6213
LOC105373153	23	X:34052907	34052907	C	-1.959	0.05017	0.6948	0.1531	0.8146	0.1763
LOC105373153	23	X:34054470	34054470	T	1.204	0.2286	1.033	0.9027	1.254	0.1356
LOC105373153	23	X:34056443	34056443	G	-0.08158	0.935	1.624	0.68	0.7136	0.6391
LOC105373153	23	X:34065398	34065398	G	-1.345	0.1787	0.748	0.3529	0.8295	0.3301
LOC105373153	23	X:34068582	34068582	A	0.7863	0.4317	0.8935	0.6771	1.241	0.159
LOC105373153	23	X:34075433	34075433	T	0.3901	0.6964	0.8869	0.9085	1.447	0.5361
LOC105373153	23	X:34080455	34080455	T	-1.453	0.1461	0.6668	0.2703	0.8137	0.3336
ZNF630	23	X:47929215	47929215	C	0.9707	0.3317	1.811	0.3912	1.182	0.5894
TMEFF2	2	2:192781139	192781139	G	1.315	0.1749	0.8754	0.7004	1.641	0.04891
TMEFF2	2	2:192795623	192795623	T	0.9981	0.9935	0.8375	0.6454	1.114	0.7316
TMEFF2	2	2:192796197	192796197	A	0.7752	0.0473	0.5492	0.003296	0.9863	0.9346
TMEFF2	2	2:192797561	192797561	G	0.7961	0.1217	0.8043	0.3633	0.7658	0.166
TMEFF2	2	2:192797804	192797804	C	1.533	0.01799	1.152	0.6504	1.717	0.01564
TMEFF2	2	2:192801202	192801202	A	0.8553	0.6282	0.7195	0.5231	0.9579	0.9178
TMEFF2	2	2:192805341	192805341	A	1.365	0.4298	2.004	0.3306	1.121	0.8196
TMEFF2	2	2:192808024	192808024	G	0.9707	0.8034	0.8456	0.4128	1.031	0.8383
TMEFF2	2	2:192808315	192808315	A	1.025	0.8484	0.9728	0.9011	1.057	0.7306
TMEFF2	2	2:192813453	192813453	T	0.8618	0.2823	1.017	0.9421	0.822	0.2728
TMEFF2	2	2:192817464	192817464	C	0.8384	0.6502	0.6044	0.4004	1.022	0.9661
TMEFF2	2	2:192821404	192821404	T	1.342	0.1581	1.522	0.2243	1.275	0.3586
TMEFF2	2	2:192822349	192822349	T	1.685	0.1311	1.952	0.2296	1.415	0.4511
TMEFF2	2	2:192823021	192823021	G	0.6434	0.2019	0.8561	0.8086	0.577	0.2028
TMEFF2	2	2:192828198	192828198	T	0.7229	0.3596	1.206	0.792	0.6134	0.2579
TMEFF2	2	2:192833894	192833894	G	0.6812	0.0006304	0.6262	0.007478	0.7282	0.03283
TMEFF2	2	2:192837203	192837203	G	0.789	0.1025	0.8517	0.492	0.7254	0.09407
TMEFF2	2	2:192841273	192841273	A	1.456	0.09044	1.212	0.5861	1.678	0.07241
TMEFF2	2	2:192843949	192843949	T	0.7402	0.01079	0.8217	0.2871	0.7033	0.0258
TMEFF2	2	2:192844260	192844260	C	0.5611	0.05607	0.3681	0.0232	0.9004	0.8101
TMEFF2	2	2:192857026	192857026	T	0.9157	0.5864	1.14	0.5931	0.8435	0.4525
TMEFF2	2	2:192858992	192858992	G	0.7207	0.1434	0.6497	0.2576	0.7196	0.2505
TMEFF2	2	2:192864325	192864325	A	0.7612	0.2033	0.4047	0.00627	1.152	0.612
TMEFF2	2	2:192864738	192864738	G	0.7068	0.2698	0.853	0.7538	0.6288	0.2762
TMEFF2	2	2:192866629	192866629	C	1.19	0.3746	0.9958	0.9893	1.366	0.209
TMEFF2	2	2:192868525	192868525	G	0.6947	0.05745	0.6104	0.1173	0.7314	0.2045
TMEFF2	2	2:192868654	192868654	G	0.3892	0.09074	0.3498	0.1886	0.3698	0.226
TMEFF2	2	2:192868656	192868656	T	1.067	0.574	1.1	0.611	1.052	0.7313
TMEFF2	2	2:192879649	192879649	T	1.937	0.1795	2.359	0.3039	1.496	0.5368
TMEFF2	2	2:192883405	192883405	C	1.028	0.8157	1.055	0.7901	0.9794	0.8928
TMEFF2	2	2:192883805	192883805	A	0.9059	0.6919	1.182	0.6927	0.8528	0.621
TMEFF2	2	2:192895571	192895571	T	1.372	0.02459	1.462	0.08795	1.314	0.1415
TMEFF2	2	2:192898315	192898315	A	0.9127	0.4729	0.9543	0.8225	0.8768	0.4176
TMEFF2	2	2:192913087	192913087	C	0.9713	0.893	1.122	0.7391	0.8551	0.5874
TMEFF2	2	2:192913879	192913879	G	0.8677	0.2373	0.8749	0.493	0.8774	0.4013
TMEFF2	2	2:192914286	192914286	T	1.314	0.0544	1.386	0.1456	1.272	0.1994
TMEFF2	2	2:192914362	192914362	A	1.057	0.7826	0.7226	0.3809	1.206	0.4249
TMEFF2	2	2:192918492	192918492	A	0.9298	0.5453	0.8899	0.5545	0.9394	0.6844
TMEFF2	2	2:192921945	192921945	T	0.8224	0.09823	0.8597	0.4211	0.8149	0.187
TMEFF2	2	2:192922256	192922256	G	0.8468	0.1686	0.8277	0.3251	0.8787	0.4143
TMEFF2	2	2:192922499	192922499	A	0.9549	0.8039	1.191	0.5675	0.7896	0.3357
TMEFF2	2	2:192924664	192924664	G	0.9838	0.939	1.197	0.5971	0.8674	0.6162
TMEFF2	2	2:192924987	192924987	A	1.22	0.1119	1.127	0.5496	1.277	0.131
TMEFF2	2	2:192927704	192927704	G	1.171	0.1971	1.16	0.4574	1.152	0.3673
TMEFF2	2	2:192929201	192929201	T	1.18	0.6518	0.8321	0.7355	1.496	0.4176
TMEFF2	2	2:192932791	192932791	G	0.8527	0.1686	0.9059	0.5885	0.8355	0.2384
TMEFF2	2	2:192939176	192939176	C	0.9831	0.9415	1.084	0.834	1.003	0.9914
TMEFF2	2	2:192940058	192940058	C	1.172	0.152	1.253	0.213	1.076	0.6129
TMEFF2	2	2:192941186	192941186	G	1.165	0.4274	1.386	0.2964	1.034	0.8962
TMEFF2	2	2:192943798	192943798	G	0.8461	0.1377	0.867	0.4235	0.8393	0.2365
TMEFF2	2	2:192943951	192943951	T	0.9382	0.7259	0.6778	0.2297	1.08	0.7271
TMEFF2	2	2:192947703	192947703	C	0.9932	0.9758	1.215	0.5989	0.9534	0.8715
TMEFF2	2	2:192951093	192951093	G	1.099	0.5236	1.071	0.7744	1.085	0.6697
TMEFF2	2	2:192952624	192952624	G	0.9181	0.7354	1.159	0.7275	0.865	0.6587
TMEFF2	2	2:192955505	192955505	C	1.14	0.6872	1.589	0.3659	0.9437	0.8996
TMEFF2	2	2:192958152	192958152	C	0.6201	0.2057	1.195	0.781	0.338	0.05722
TMEFF2	2	2:192960857	192960857	A	1.051	0.7154	0.8145	0.3498	1.239	0.2238
TMEFF2	2	2:192961984	192961984	C	0.9424	0.876	1.177	0.7647	0.934	0.9028
TMEFF2	2	2:192962499	192962499	A	1.265	0.5482	1.897	0.3338	0.9166	0.8665
TMEFF2	2	2:192963914	192963914	A	1.12	0.7404	1.89	0.2913	0.6497	0.391
TMEFF2	2	2:192965939	192965939	T	0.9077	0.5979	0.478	0.01092	1.411	0.1548
TMEFF2	2	2:192967164	192967164	A	0.8991	0.6598	0.8788	0.7552	0.9268	0.8017
TMEFF2	2	2:192975391	192975391	C	0.9597	0.9116	0.2924	0.06105	1.855	0.1639
TMEFF2	2	2:192975435	192975435	A	1.035	0.8847	0.8895	0.7579	1.163	0.6124
TMEFF2	2	2:192975472	192975472	G	0.8746	0.7663	1.044	0.9527	0.7	0.5539
TMEFF2	2	2:192979503	192979503	C	0.9843	0.9431	0.9731	0.9343	0.9982	0.9955
TMEFF2	2	2:192983140	192983140	T	0.8823	0.5519	1.309	0.4422	0.6951	0.2007
TMEFF2	2	2:192984506	192984506	C	1.055	0.8899	0.5431	0.3737	1.346	0.5123
TMEFF2	2	2:192986007	192986007	T	0.7195	0.03123	0.9933	0.9773	0.5599	0.007024
TMEFF2	2	2:192986033	192986033	A	0.9053	0.5085	0.9732	0.916	0.8503	0.3903
TMEFF2	2	2:192988342	192988342	C	2.006	0.04324	4.304	0.01818	1.425	0.4296
TMEFF2	2	2:192989148	192989148	T	1.223	0.1814	0.6893	0.13	1.673	0.006663
TMEFF2	2	2:192991640	192991640	G	0.8395	0.112	0.9155	0.6189	0.6949	0.01181
TMEFF2	2	2:192992563	192992563	T	0.5906	0.1936	0.2872	0.0931	0.89	0.8085
TMEFF2	2	2:193006816	193006816	G	1.457	0.4318	1.241	0.8009	1.664	0.3806
TMEFF2	2	2:193011395	193011395	A	1.259	0.131	1.334	0.227	1.167	0.448
TMEFF2	2	2:193011880	193011880	G	0.9152	0.5455	0.9541	0.8464	0.8785	0.4883
TMEFF2	2	2:193013528	193013528	T	1.004	0.9689	1.22	0.2786	0.8856	0.4227
TMEFF2	2	2:193022722	193022722	T	1.157	0.2916	1.19	0.4085	1.115	0.5619
TMEFF2	2	2:193023767	193023767	G	0.9431	0.6064	0.7499	0.1255	1.095	0.5306
TMEFF2	2	2:193029999	193029999	A	1.094	0.4269	1.079	0.6791	1.08	0.5991
TMEFF2	2	2:193030388	193030388	C	1.186	0.6807	2.791	0.2306	0.8773	0.8005
TMEFF2	2	2:193030800	193030800	T	0.9359	0.717	1.23	0.4704	0.7621	0.2702
TMEFF2	2	2:193031912	193031912	T	1.201	0.2785	1.095	0.7314	1.3	0.2293
TMEFF2	2	2:193034706	193034706	T	1.081	0.5208	1.422	0.07389	0.9	0.5148
TMEFF2	2	2:193036678	193036678	T	0.9686	0.7791	1.167	0.4096	0.8689	0.3371
TMEFF2	2	2:193040711	193040711	A	1.082	0.8007	0.7251	0.529	1.333	0.4545
TMEFF2	2	2:193044369	193044369	C	0.3686	0.04404	0.527	0.3858	0.258	0.08666
TMEFF2	2	2:193046647	193046647	T	0.9219	0.5398	1.33	0.1892	0.7218	0.07155
TMEFF2	2	2:193050042	193050042	T	0.9936	0.9719	1.625	0.1118	0.7197	0.1966
TMEFF2	2	2:193051053	193051053	G	1.07	0.8102	1.561	0.284	0.7936	0.5959
TMEFF2	2	2:193051065	193051065	C	0.9936	0.9719	1.625	0.1118	0.7197	0.1966
TMEFF2	2	2:193051320	193051320	A	1.067	0.6573	0.9324	0.7656	1.129	0.5165
TMEFF2	2	2:193056167	193056167	G	0.7771	0.146	0.9237	0.774	0.6759	0.0987
TMEFF2	2	2:193060299	193060299	C	0.8913	0.5083	0.8583	0.5889	0.8795	0.5685
TMEFF2	2	2:193061803	193061803	C	1.425	0.1915	1.119	0.809	1.693	0.1104
TMEFF2	2	2:193066788	193066788	C	0.999	0.9974	0.888	0.7844	1.162	0.7152
HAUS6	7	7:19064020	19064020	G	0.9847	0.9178	1.165	0.5202	0.8855	0.5342
HAUS6	7	7:19067252	19067252	G	0.9885	0.9406	0.9483	0.8353	1.009	0.9636
HAUS6	7	7:19069178	19069178	G	0.9992	0.9954	0.7831	0.2632	1.148	0.4322
HAUS6	7	7:19070165	19070165	T	1.12	0.3531	1.269	0.2305	1.03	0.8508
HAUS6	7	7:19080344	19080344	G	1.187	0.3632	1.578	0.1328	0.9437	0.8186
HAUS6	7	7:19081274	19081274	T	0.9687	0.86	1.131	0.6943	0.8906	0.6092
HAUS6	7	7:19081987	19081987	A	0.9773	0.9461	0.7999	0.6825	1.088	0.8453
HAUS6	7	7:19100076	19100076	G	1.111	0.3793	1.301	0.1801	0.9994	0.9967
HAUS6	7	7:19101549	19101549	C	0.8225	0.4195	0.6347	0.2689	0.9714	0.9217
HAUS6	7	7:19104468	19104468	G	1.117	0.365	1.27	0.2275	1.021	0.8924
HAUS6	7	7:19105119	19105119	A	0.532	0.2112	0.6137	0.5439	0.537	0.3481
HAUS6	7	7:19105273	19105273	T	1.051	0.7937	1.013	0.9669	1.128	0.6235
HAUS6	7	7:19106205	19106205	C	1.047	0.8082	1.009	0.9763	1.122	0.6379
HAUS6	7	7:19106539	19106539	A	0.8932	0.4524	0.8303	0.4296	0.8886	0.5594
HAUS6	7	7:19107986	19107986	G	0.9488	0.656	0.8583	0.4298	0.9922	0.9586
KCND2	7	7:119925567	119925567	C	0.8749	0.5887	0.7765	0.5232	0.9132	0.7756
KCND2	7	7:119944579	119944579	T	1.014	0.896	1.012	0.9495	1.039	0.7864
KCND2	7	7:119950420	119950420	T	0.7832	0.2193	0.8558	0.6452	0.7249	0.1992
KCND2	7	7:119955905	119955905	T	2.114	0.03027	1.506	0.4555	2.243	0.06432
KCND2	7	7:119962271	119962271	C	0.6937	0.3079	0.2526	0.05974	1.014	0.9738
KCND2	7	7:119967322	119967322	C	0.8661	0.5356	0.9287	0.8514	0.8182	0.4963
KCND2	7	7:119977971	119977971	G	0.8766	0.2591	0.9847	0.9351	0.8071	0.1582
KCND2	7	7:119997267	119997267	C	1.009	0.9509	1.111	0.657	0.9384	0.7352
KCND2	7	7:120000485	120000485	G	1.273	0.2801	1.146	0.6615	1.577	0.1596
KCND2	7	7:120003915	120003915	T	0.8369	0.3787	0.9192	0.7957	0.7572	0.2995
KCND2	7	7:120012325	120012325	A	0.9882	0.9707	0.6017	0.2803	1.356	0.4792
KCND2	7	7:120015600	120015600	A	0.9647	0.8955	0.9148	0.8287	1.146	0.7149
KCND2	7	7:120015843	120015843	G	0.9562	0.7886	0.9279	0.782	0.9791	0.9218
KCND2	7	7:120032750	120032750	G	1.253	0.3064	1.187	0.6303	1.201	0.5262
KCND2	7	7:120035706	120035706	T	0.9508	0.6598	1.045	0.82	1.093	0.5379
KCND2	7	7:120038093	120038093	A	0.7184	0.4152	0.6037	0.4368	0.7206	0.5323
KCND2	7	7:120038161	120038161	T	0.8279	0.4382	0.7648	0.5112	0.8359	0.5621
KCND2	7	7:120065440	120065440	A	1.122	0.6609	1.276	0.5599	0.9306	0.8367
KCND2	7	7:120066516	120066516	A	0.7344	0.2231	0.9296	0.8596	0.6918	0.2661
KCND2	7	7:120066642	120066642	T	0.8102	0.3928	0.6913	0.3739	0.8359	0.5621
KCND2	7	7:120086619	120086619	T	1.054	0.6498	1.027	0.8921	1.093	0.5417
KCND2	7	7:120110248	120110248	G	1.08	0.5868	1.036	0.8783	1.052	0.7849
KCND2	7	7:120114286	120114286	A	0.8624	0.5738	1.101	0.8205	0.6589	0.2452
KCND2	7	7:120122072	120122072	G	0.5768	0.09686	0.5333	0.2064	0.5703	0.2318
KCND2	7	7:120145310	120145310	C	1.189	0.1283	1.006	0.9758	1.331	0.05236
KCND2	7	7:120150870	120150870	G	0.9419	0.6113	1.079	0.6919	0.8382	0.2476
KCND2	7	7:120169316	120169316	T	1.222	0.08062	1.026	0.8911	1.384	0.03095
KCND2	7	7:120171178	120171178	T	0.9187	0.7537	1.412	0.4743	0.7345	0.3851
KCND2	7	7:120187432	120187432	C	0.8771	0.283	0.9266	0.7048	0.8332	0.248
KCND2	7	7:120187785	120187785	G	1.222	0.1018	1.071	0.7358	1.329	0.06969
KCND2	7	7:120193860	120193860	C	0.8327	0.3701	1.094	0.7952	0.7488	0.2711
KCND2	7	7:120199330	120199330	A	2.779	0.04115	4.791	0.1474	1.824	0.3238
KCND2	7	7:120205649	120205649	C	1.103	0.8086	0.5051	0.2637	1.886	0.2309
KCND2	7	7:120206385	120206385	T	0.8539	0.2557	1.433	0.1246	0.6184	0.01043
KCND2	7	7:120210470	120210470	A	0.8232	0.4659	0.5796	0.2417	1.039	0.9072
KCND2	7	7:120210936	120210936	G	1.069	0.8745	0.9535	0.9425	1.293	0.6517
KCND2	7	7:120216006	120216006	C	0.8327	0.3701	1.094	0.7952	0.7488	0.2711
KCND2	7	7:120269866	120269866	A	0.7339	0.01215	0.88	0.5207	0.6522	0.008438
KCND2	7	7:120270756	120270756	C	0.708	0.07733	0.9683	0.9197	0.5389	0.02417
KCND2	7	7:120273788	120273788	G	1.244	0.5213	1.698	0.3972	1.058	0.8929
KCND2	7	7:120278843	120278843	T	1.107	0.421	1.04	0.8486	1.133	0.4403
KCND2	7	7:120293548	120293548	C	2.721	0.06236	4.386	0.1833	1.893	0.3349
KCND2	7	7:120300038	120300038	A	0.9543	0.8938	0.4958	0.2438	1.279	0.5611
KCND2	7	7:120301716	120301716	A	1.059	0.6094	1.071	0.7097	1.052	0.7198
KCND2	7	7:120303716	120303716	G	1.382	0.4126	1.018	0.9773	1.57	0.3591
KCND2	7	7:120305149	120305149	A	0.9258	0.6963	0.9018	0.7499	0.9413	0.8117
KCND2	7	7:120312746	120312746	A	1.059	0.6373	1.086	0.679	1.029	0.8556
KCND2	7	7:120317578	120317578	G	0.9808	0.9347	1.029	0.9392	0.9169	0.7817
KCND2	7	7:120320944	120320944	T	1.048	0.6765	1.055	0.7729	1.048	0.7398
KCND2	7	7:120323727	120323727	G	1.048	0.6765	1.055	0.7729	1.048	0.7398
KCND2	7	7:120327594	120327594	A	0.4179	0.05967	0.4242	0.1729	0.4308	0.2329
KCND2	7	7:120335338	120335338	A	1.059	0.6036	1.044	0.8111	1.077	0.6034
KCND2	7	7:120339674	120339674	A	1.431	0.01056	1.342	0.2041	1.448	0.03892
KCND2	7	7:120360544	120360544	G	1.213	0.5216	1.724	0.3172	1.097	0.8096
KCND2	7	7:120364028	120364028	T	0.9525	0.6625	0.9948	0.9766	0.946	0.7022
KCND2	7	7:120365036	120365036	C	0.7996	0.6197	0.9289	0.9227	0.7658	0.6367
KCND2	7	7:120366751	120366751	G	1.009	0.97	0.9806	0.9577	0.989	0.9729
KCND2	7	7:120366981	120366981	A	0.585	0.03994	0.8004	0.5746	0.3677	0.01737
KCND2	7	7:120373783	120373783	T	1.005	0.9809	1.744	0.1166	0.7056	0.1955
KCND2	7	7:120380907	120380907	T	1.006	0.9757	1.859	0.07867	0.7157	0.1853
KCND2	7	7:120384791	120384791	G	0.8072	0.4329	0.9136	0.8451	0.695	0.3151
KCND2	7	7:120388281	120388281	C	0.8701	0.6917	0.7128	0.5524	1.103	0.8256
KCND2	7	7:120392333	120392333	C	0.9178	0.4995	1.155	0.5098	0.7926	0.152
KCND2	7	7:120394320	120394320	C	0.5991	0.1688	0.3792	0.09724	0.9186	0.8634
KCND2	7	7:120396758	120396758	C	1.007	0.9707	1.739	0.1187	0.7073	0.1994
KCND2	7	7:119925567	119925567	C	0.8749	0.5887	0.7765	0.5232	0.9132	0.7756
KCND2	7	7:119944579	119944579	T	1.014	0.896	1.012	0.9495	1.039	0.7864
KCND2	7	7:119950420	119950420	T	0.7832	0.2193	0.8558	0.6452	0.7249	0.1992
KCND2	7	7:119955905	119955905	T	2.114	0.03027	1.506	0.4555	2.243	0.06432
KCND2	7	7:119962271	119962271	C	0.6937	0.3079	0.2526	0.05974	1.014	0.9738
KCND2	7	7:119967322	119967322	C	0.8661	0.5356	0.9287	0.8514	0.8182	0.4963
KCND2	7	7:119977971	119977971	G	0.8766	0.2591	0.9847	0.9351	0.8071	0.1582
KCND2	7	7:119997267	119997267	C	1.009	0.9509	1.111	0.657	0.9384	0.7352
KCND2	7	7:120000485	120000485	G	1.273	0.2801	1.146	0.6615	1.577	0.1596
KCND2	7	7:120003915	120003915	T	0.8369	0.3787	0.9192	0.7957	0.7572	0.2995
KCND2	7	7:120012325	120012325	A	0.9882	0.9707	0.6017	0.2803	1.356	0.4792
KCND2	7	7:120015600	120015600	A	0.9647	0.8955	0.9148	0.8287	1.146	0.7149
KCND2	7	7:120015843	120015843	G	0.9562	0.7886	0.9279	0.782	0.9791	0.9218
KCND2	7	7:120032750	120032750	G	1.253	0.3064	1.187	0.6303	1.201	0.5262
KCND2	7	7:120035706	120035706	T	0.9508	0.6598	1.045	0.82	1.093	0.5379
KCND2	7	7:120038093	120038093	A	0.7184	0.4152	0.6037	0.4368	0.7206	0.5323
KCND2	7	7:120038161	120038161	T	0.8279	0.4382	0.7648	0.5112	0.8359	0.5621
KCND2	7	7:120065440	120065440	A	1.122	0.6609	1.276	0.5599	0.9306	0.8367
KCND2	7	7:120066516	120066516	A	0.7344	0.2231	0.9296	0.8596	0.6918	0.2661
KCND2	7	7:120066642	120066642	T	0.8102	0.3928	0.6913	0.3739	0.8359	0.5621
KCND2	7	7:120086619	120086619	T	1.054	0.6498	1.027	0.8921	1.093	0.5417
KCND2	7	7:120110248	120110248	G	1.08	0.5868	1.036	0.8783	1.052	0.7849
KCND2	7	7:120114286	120114286	A	0.8624	0.5738	1.101	0.8205	0.6589	0.2452
KCND2	7	7:120122072	120122072	G	0.5768	0.09686	0.5333	0.2064	0.5703	0.2318
KCND2	7	7:120145310	120145310	C	1.189	0.1283	1.006	0.9758	1.331	0.05236
KCND2	7	7:120150870	120150870	G	0.9419	0.6113	1.079	0.6919	0.8382	0.2476
KCND2	7	7:120169316	120169316	T	1.222	0.08062	1.026	0.8911	1.384	0.03095
KCND2	7	7:120171178	120171178	T	0.9187	0.7537	1.412	0.4743	0.7345	0.3851
KCND2	7	7:120187432	120187432	C	0.8771	0.283	0.9266	0.7048	0.8332	0.248
KCND2	7	7:120187785	120187785	G	1.222	0.1018	1.071	0.7358	1.329	0.06969
KCND2	7	7:120193860	120193860	C	0.8327	0.3701	1.094	0.7952	0.7488	0.2711
KCND2	7	7:120199330	120199330	A	2.779	0.04115	4.791	0.1474	1.824	0.3238
KCND2	7	7:120205649	120205649	C	1.103	0.8086	0.5051	0.2637	1.886	0.2309
KCND2	7	7:120206385	120206385	T	0.8539	0.2557	1.433	0.1246	0.6184	0.01043
KCND2	7	7:120210470	120210470	A	0.8232	0.4659	0.5796	0.2417	1.039	0.9072
KCND2	7	7:120210936	120210936	G	1.069	0.8745	0.9535	0.9425	1.293	0.6517
KCND2	7	7:120216006	120216006	C	0.8327	0.3701	1.094	0.7952	0.7488	0.2711
KCND2	7	7:120269866	120269866	A	0.7339	0.01215	0.88	0.5207	0.6522	0.008438
KCND2	7	7:120270756	120270756	C	0.708	0.07733	0.9683	0.9197	0.5389	0.02417
KCND2	7	7:120273788	120273788	G	1.244	0.5213	1.698	0.3972	1.058	0.8929
KCND2	7	7:120278843	120278843	T	1.107	0.421	1.04	0.8486	1.133	0.4403
KCND2	7	7:120293548	120293548	C	2.721	0.06236	4.386	0.1833	1.893	0.3349
KCND2	7	7:120300038	120300038	A	0.9543	0.8938	0.4958	0.2438	1.279	0.5611
KCND2	7	7:120301716	120301716	A	1.059	0.6094	1.071	0.7097	1.052	0.7198
KCND2	7	7:120303716	120303716	G	1.382	0.4126	1.018	0.9773	1.57	0.3591
KCND2	7	7:120305149	120305149	A	0.9258	0.6963	0.9018	0.7499	0.9413	0.8117
KCND2	7	7:120312746	120312746	A	1.059	0.6373	1.086	0.679	1.029	0.8556
KCND2	7	7:120317578	120317578	G	0.9808	0.9347	1.029	0.9392	0.9169	0.7817
KCND2	7	7:120320944	120320944	T	1.048	0.6765	1.055	0.7729	1.048	0.7398
KCND2	7	7:120323727	120323727	G	1.048	0.6765	1.055	0.7729	1.048	0.7398
KCND2	7	7:120327594	120327594	A	0.4179	0.05967	0.4242	0.1729	0.4308	0.2329
KCND2	7	7:120335338	120335338	A	1.059	0.6036	1.044	0.8111	1.077	0.6034
KCND2	7	7:120339674	120339674	A	1.431	0.01056	1.342	0.2041	1.448	0.03892
KCND2	7	7:120360544	120360544	G	1.213	0.5216	1.724	0.3172	1.097	0.8096
KCND2	7	7:120364028	120364028	T	0.9525	0.6625	0.9948	0.9766	0.946	0.7022
KCND2	7	7:120365036	120365036	C	0.7996	0.6197	0.9289	0.9227	0.7658	0.6367
KCND2	7	7:120366751	120366751	G	1.009	0.97	0.9806	0.9577	0.989	0.9729
KCND2	7	7:120366981	120366981	A	0.585	0.03994	0.8004	0.5746	0.3677	0.01737
KCND2	7	7:120373783	120373783	T	1.005	0.9809	1.744	0.1166	0.7056	0.1955
KCND2	7	7:120380907	120380907	T	1.006	0.9757	1.859	0.07867	0.7157	0.1853
KCND2	7	7:120384791	120384791	G	0.8072	0.4329	0.9136	0.8451	0.695	0.3151
KCND2	7	7:120388281	120388281	C	0.8701	0.6917	0.7128	0.5524	1.103	0.8256
KCND2	7	7:120392333	120392333	C	0.9178	0.4995	1.155	0.5098	0.7926	0.152
KCND2	7	7:120394320	120394320	C	0.5991	0.1688	0.3792	0.09724	0.9186	0.8634
KCND2	7	7:120396758	120396758	C	1.007	0.9707	1.739	0.1187	0.7073	0.1994
TMEFF2	2	2:192781139	192781139	G	1.315	0.1749	0.8754	0.7004	1.641	0.04891
TMEFF2	2	2:192795623	192795623	T	0.9981	0.9935	0.8375	0.6454	1.114	0.7316
TMEFF2	2	2:192796197	192796197	A	0.7752	0.0473	0.5492	0.003296	0.9863	0.9346
TMEFF2	2	2:192797561	192797561	G	0.7961	0.1217	0.8043	0.3633	0.7658	0.166
TMEFF2	2	2:192797804	192797804	C	1.533	0.01799	1.152	0.6504	1.717	0.01564
TMEFF2	2	2:192801202	192801202	A	0.8553	0.6282	0.7195	0.5231	0.9579	0.9178
TMEFF2	2	2:192805341	192805341	A	1.365	0.4298	2.004	0.3306	1.121	0.8196
TMEFF2	2	2:192808024	192808024	G	0.9707	0.8034	0.8456	0.4128	1.031	0.8383
TMEFF2	2	2:192808315	192808315	A	1.025	0.8484	0.9728	0.9011	1.057	0.7306
TMEFF2	2	2:192813453	192813453	T	0.8618	0.2823	1.017	0.9421	0.822	0.2728
TMEFF2	2	2:192817464	192817464	C	0.8384	0.6502	0.6044	0.4004	1.022	0.9661
TMEFF2	2	2:192821404	192821404	T	1.342	0.1581	1.522	0.2243	1.275	0.3586
TMEFF2	2	2:192822349	192822349	T	1.685	0.1311	1.952	0.2296	1.415	0.4511
TMEFF2	2	2:192823021	192823021	G	0.6434	0.2019	0.8561	0.8086	0.577	0.2028
TMEFF2	2	2:192828198	192828198	T	0.7229	0.3596	1.206	0.792	0.6134	0.2579
TMEFF2	2	2:192833894	192833894	G	0.6812	0.0006304	0.6262	0.007478	0.7282	0.03283
TMEFF2	2	2:192837203	192837203	G	0.789	0.1025	0.8517	0.492	0.7254	0.09407
TMEFF2	2	2:192841273	192841273	A	1.456	0.09044	1.212	0.5861	1.678	0.07241
TMEFF2	2	2:192843949	192843949	T	0.7402	0.01079	0.8217	0.2871	0.7033	0.0258
TMEFF2	2	2:192844260	192844260	C	0.5611	0.05607	0.3681	0.0232	0.9004	0.8101
TMEFF2	2	2:192857026	192857026	T	0.9157	0.5864	1.14	0.5931	0.8435	0.4525
TMEFF2	2	2:192858992	192858992	G	0.7207	0.1434	0.6497	0.2576	0.7196	0.2505
TMEFF2	2	2:192864325	192864325	A	0.7612	0.2033	0.4047	0.00627	1.152	0.612
TMEFF2	2	2:192864738	192864738	G	0.7068	0.2698	0.853	0.7538	0.6288	0.2762
TMEFF2	2	2:192866629	192866629	C	1.19	0.3746	0.9958	0.9893	1.366	0.209
TMEFF2	2	2:192868525	192868525	G	0.6947	0.05745	0.6104	0.1173	0.7314	0.2045
TMEFF2	2	2:192868654	192868654	G	0.3892	0.09074	0.3498	0.1886	0.3698	0.226
TMEFF2	2	2:192868656	192868656	T	1.067	0.574	1.1	0.611	1.052	0.7313
TMEFF2	2	2:192879649	192879649	T	1.937	0.1795	2.359	0.3039	1.496	0.5368
TMEFF2	2	2:192883405	192883405	C	1.028	0.8157	1.055	0.7901	0.9794	0.8928
TMEFF2	2	2:192883805	192883805	A	0.9059	0.6919	1.182	0.6927	0.8528	0.621
TMEFF2	2	2:192895571	192895571	T	1.372	0.02459	1.462	0.08795	1.314	0.1415
TMEFF2	2	2:192898315	192898315	A	0.9127	0.4729	0.9543	0.8225	0.8768	0.4176
TMEFF2	2	2:192913087	192913087	C	0.9713	0.893	1.122	0.7391	0.8551	0.5874
TMEFF2	2	2:192913879	192913879	G	0.8677	0.2373	0.8749	0.493	0.8774	0.4013
TMEFF2	2	2:192914286	192914286	T	1.314	0.0544	1.386	0.1456	1.272	0.1994
TMEFF2	2	2:192914362	192914362	A	1.057	0.7826	0.7226	0.3809	1.206	0.4249
TMEFF2	2	2:192918492	192918492	A	0.9298	0.5453	0.8899	0.5545	0.9394	0.6844
TMEFF2	2	2:192921945	192921945	T	0.8224	0.09823	0.8597	0.4211	0.8149	0.187
TMEFF2	2	2:192922256	192922256	G	0.8468	0.1686	0.8277	0.3251	0.8787	0.4143
TMEFF2	2	2:192922499	192922499	A	0.9549	0.8039	1.191	0.5675	0.7896	0.3357
TMEFF2	2	2:192924664	192924664	G	0.9838	0.939	1.197	0.5971	0.8674	0.6162
TMEFF2	2	2:192924987	192924987	A	1.22	0.1119	1.127	0.5496	1.277	0.131
TMEFF2	2	2:192927704	192927704	G	1.171	0.1971	1.16	0.4574	1.152	0.3673
TMEFF2	2	2:192929201	192929201	T	1.18	0.6518	0.8321	0.7355	1.496	0.4176
TMEFF2	2	2:192932791	192932791	G	0.8527	0.1686	0.9059	0.5885	0.8355	0.2384
TMEFF2	2	2:192939176	192939176	C	0.9831	0.9415	1.084	0.834	1.003	0.9914
TMEFF2	2	2:192940058	192940058	C	1.172	0.152	1.253	0.213	1.076	0.6129
TMEFF2	2	2:192941186	192941186	G	1.165	0.4274	1.386	0.2964	1.034	0.8962
TMEFF2	2	2:192943798	192943798	G	0.8461	0.1377	0.867	0.4235	0.8393	0.2365
TMEFF2	2	2:192943951	192943951	T	0.9382	0.7259	0.6778	0.2297	1.08	0.7271
TMEFF2	2	2:192947703	192947703	C	0.9932	0.9758	1.215	0.5989	0.9534	0.8715
TMEFF2	2	2:192951093	192951093	G	1.099	0.5236	1.071	0.7744	1.085	0.6697
TMEFF2	2	2:192952624	192952624	G	0.9181	0.7354	1.159	0.7275	0.865	0.6587
TMEFF2	2	2:192955505	192955505	C	1.14	0.6872	1.589	0.3659	0.9437	0.8996
TMEFF2	2	2:192958152	192958152	C	0.6201	0.2057	1.195	0.781	0.338	0.05722
TMEFF2	2	2:192960857	192960857	A	1.051	0.7154	0.8145	0.3498	1.239	0.2238
TMEFF2	2	2:192961984	192961984	C	0.9424	0.876	1.177	0.7647	0.934	0.9028
TMEFF2	2	2:192962499	192962499	A	1.265	0.5482	1.897	0.3338	0.9166	0.8665
TMEFF2	2	2:192963914	192963914	A	1.12	0.7404	1.89	0.2913	0.6497	0.391
TMEFF2	2	2:192965939	192965939	T	0.9077	0.5979	0.478	0.01092	1.411	0.1548
TMEFF2	2	2:192967164	192967164	A	0.8991	0.6598	0.8788	0.7552	0.9268	0.8017
TMEFF2	2	2:192975391	192975391	C	0.9597	0.9116	0.2924	0.06105	1.855	0.1639
TMEFF2	2	2:192975435	192975435	A	1.035	0.8847	0.8895	0.7579	1.163	0.6124
TMEFF2	2	2:192975472	192975472	G	0.8746	0.7663	1.044	0.9527	0.7	0.5539
TMEFF2	2	2:192979503	192979503	C	0.9843	0.9431	0.9731	0.9343	0.9982	0.9955
TMEFF2	2	2:192983140	192983140	T	0.8823	0.5519	1.309	0.4422	0.6951	0.2007
TMEFF2	2	2:192984506	192984506	C	1.055	0.8899	0.5431	0.3737	1.346	0.5123
TMEFF2	2	2:192986007	192986007	T	0.7195	0.03123	0.9933	0.9773	0.5599	0.007024
TMEFF2	2	2:192986033	192986033	A	0.9053	0.5085	0.9732	0.916	0.8503	0.3903
TMEFF2	2	2:192988342	192988342	C	2.006	0.04324	4.304	0.01818	1.425	0.4296
TMEFF2	2	2:192989148	192989148	T	1.223	0.1814	0.6893	0.13	1.673	0.006663
TMEFF2	2	2:192991640	192991640	G	0.8395	0.112	0.9155	0.6189	0.6949	0.01181
TMEFF2	2	2:192992563	192992563	T	0.5906	0.1936	0.2872	0.0931	0.89	0.8085
TMEFF2	2	2:193006816	193006816	G	1.457	0.4318	1.241	0.8009	1.664	0.3806
TMEFF2	2	2:193011395	193011395	A	1.259	0.131	1.334	0.227	1.167	0.448
TMEFF2	2	2:193011880	193011880	G	0.9152	0.5455	0.9541	0.8464	0.8785	0.4883
TMEFF2	2	2:193013528	193013528	T	1.004	0.9689	1.22	0.2786	0.8856	0.4227
TMEFF2	2	2:193022722	193022722	T	1.157	0.2916	1.19	0.4085	1.115	0.5619
TMEFF2	2	2:193023767	193023767	G	0.9431	0.6064	0.7499	0.1255	1.095	0.5306
TMEFF2	2	2:193029999	193029999	A	1.094	0.4269	1.079	0.6791	1.08	0.5991
TMEFF2	2	2:193030388	193030388	C	1.186	0.6807	2.791	0.2306	0.8773	0.8005
TMEFF2	2	2:193030800	193030800	T	0.9359	0.717	1.23	0.4704	0.7621	0.2702
TMEFF2	2	2:193031912	193031912	T	1.201	0.2785	1.095	0.7314	1.3	0.2293
TMEFF2	2	2:193034706	193034706	T	1.081	0.5208	1.422	0.07389	0.9	0.5148
TMEFF2	2	2:193036678	193036678	T	0.9686	0.7791	1.167	0.4096	0.8689	0.3371
TMEFF2	2	2:193040711	193040711	A	1.082	0.8007	0.7251	0.529	1.333	0.4545
TMEFF2	2	2:193044369	193044369	C	0.3686	0.04404	0.527	0.3858	0.258	0.08666
TMEFF2	2	2:193046647	193046647	T	0.9219	0.5398	1.33	0.1892	0.7218	0.07155
TMEFF2	2	2:193050042	193050042	T	0.9936	0.9719	1.625	0.1118	0.7197	0.1966
TMEFF2	2	2:193051053	193051053	G	1.07	0.8102	1.561	0.284	0.7936	0.5959
TMEFF2	2	2:193051065	193051065	C	0.9936	0.9719	1.625	0.1118	0.7197	0.1966
TMEFF2	2	2:193051320	193051320	A	1.067	0.6573	0.9324	0.7656	1.129	0.5165
TMEFF2	2	2:193056167	193056167	G	0.7771	0.146	0.9237	0.774	0.6759	0.0987
TMEFF2	2	2:193060299	193060299	C	0.8913	0.5083	0.8583	0.5889	0.8795	0.5685
TMEFF2	2	2:193061803	193061803	C	1.425	0.1915	1.119	0.809	1.693	0.1104
TMEFF2	2	2:193066788	193066788	C	0.999	0.9974	0.888	0.7844	1.162	0.7152
EBF1	5	5:158136406	158136406	A	0.912	0.4974	1.119	0.6199	0.7909	0.1845
EBF1	5	5:158138479	158138479	C	0.5022	0.0006851	0.6146	0.1022	0.3973	0.002112
EBF1	5	5:158139228	158139228	T	2.45	0.06327	2.22	0.2854	2.678	0.1105
EBF1	5	5:158144653	158144653	T	1.685	0.09421	2.778	0.07971	1.315	0.4822
EBF1	5	5:158148185	158148185	A	0.316	0.02164	0.3924	0.239	0.3079	0.07538
EBF1	5	5:158165641	158165641	T	0.7589	0.1141	0.5747	0.05612	0.9186	0.7013
EBF1	5	5:158167822	158167822	G	1.717	0.05521	2.212	0.1493	1.625	0.1498
EBF1	5	5:158173133	158173133	C	1.461	0.4309	2.326	0.3303	0.9785	0.9727
EBF1	5	5:158174227	158174227	G	0.9101	0.4179	0.7162	0.08752	1.018	0.9051
EBF1	5	5:158174315	158174315	G	0.8862	0.2967	0.684	0.04991	1.008	0.9558
EBF1	5	5:158182330	158182330	T	1.458	0.07147	2.2	0.04793	1.153	0.5791
EBF1	5	5:158183996	158183996	C	0.7861	0.2032	0.5454	0.06361	0.9128	0.6964
EBF1	5	5:158186469	158186469	T	1.079	0.8025	0.7972	0.6268	1.327	0.458
EBF1	5	5:158196742	158196742	C	0.9397	0.7834	1.502	0.3158	0.774	0.3781
EBF1	5	5:158202529	158202529	C	1.105	0.8136	2.671	0.2648	0.728	0.5517
EBF1	5	5:158208030	158208030	A	1.1	0.714	0.6232	0.217	1.586	0.1777
EBF1	5	5:158220193	158220193	A	1.173	0.2179	1.462	0.0761	1.015	0.9273
EBF1	5	5:158222866	158222866	C	1.343	0.3032	2.174	0.08078	0.8739	0.7451
EBF1	5	5:158241868	158241868	T	0.5117	0.0594	0.5148	0.2157	0.483	0.1568
EBF1	5	5:158242303	158242303	T	1.571	0.3586	1.132	0.8838	1.763	0.333
EBF1	5	5:158244083	158244083	T	1.147	0.285	1.397	0.1095	1.008	0.9607
EBF1	5	5:158245189	158245189	T	0.9626	0.9	1.176	0.7299	0.7989	0.5958
EBF1	5	5:158246650	158246650	C	1.021	0.896	0.7538	0.2646	1.207	0.3432
EBF1	5	5:158249275	158249275	C	0.8599	0.2435	0.839	0.3953	0.8526	0.3469
EBF1	5	5:158253234	158253234	A	1.298	0.4977	1.508	0.4297	1.189	0.7653
EBF1	5	5:158256767	158256767	T	0.8415	0.1539	0.7717	0.1788	0.8874	0.4513
EBF1	5	5:158258461	158258461	T	1.186	0.1445	1.444	0.05197	1.033	0.8334
EBF1	5	5:158262419	158262419	G	0.7581	0.1443	0.7375	0.3316	0.7658	0.274
EBF1	5	5:158265490	158265490	C	1.099	0.6572	2.024	0.09899	0.8375	0.4999
EBF1	5	5:158270015	158270015	T	1.162	0.7024	0.8732	0.8193	1.537	0.4196
EBF1	5	5:158274071	158274071	C	1.105	0.3499	1.223	0.2445	1.012	0.9322
EBF1	5	5:158279866	158279866	A	0.8627	0.7584	1.264	0.72	0.5312	0.437
EBF1	5	5:158282326	158282326	C	0.9377	0.7121	1.062	0.8412	0.8586	0.4919
EBF1	5	5:158290095	158290095	A	0.7646	0.05077	0.7541	0.1979	0.7595	0.1272
EBF1	5	5:158300798	158300798	T	1.032	0.777	1.34	0.126	0.8609	0.2924
EBF1	5	5:158321403	158321403	T	1.158	0.2621	1.344	0.1641	1.03	0.8612
EBF1	5	5:158321407	158321407	A	1.155	0.2705	1.344	0.1641	1.025	0.8826
EBF1	5	5:158331675	158331675	T	1.192	0.677	0.8732	0.8193	1.742	0.3638
EBF1	5	5:158332380	158332380	C	1.177	0.1947	1.413	0.09826	1.035	0.8313
EBF1	5	5:158345923	158345923	A	0.6306	0.00965	0.4988	0.01507	0.6926	0.1134
EBF1	5	5:158357272	158357272	G	1.256	0.04386	1.237	0.2451	1.275	0.09476
EBF1	5	5:158357280	158357280	T	1.23	0.06734	1.211	0.2956	1.246	0.1317
EBF1	5	5:158359476	158359476	A	1.237	0.07754	1.524	0.03565	1.101	0.5282
EBF1	5	5:158366263	158366263	G	1.272	0.03393	1.239	0.2355	1.308	0.06846
EBF1	5	5:158367785	158367785	T	1.295	0.3708	0.9666	0.9426	1.697	0.1472
EBF1	5	5:158378367	158378367	A	1.164	0.7295	0.9874	0.9845	1.613	0.4259
EBF1	5	5:158381849	158381849	G	1.194	0.2078	0.9212	0.71	1.472	0.03632
EBF1	5	5:158386181	158386181	A	1.187	0.1861	1.631	0.02087	0.9677	0.8464
EBF1	5	5:158386694	158386694	C	0.7289	0.01939	0.6976	0.1005	0.7224	0.06547
EBF1	5	5:158393054	158393054	A	0.9387	0.6756	0.888	0.63	0.9959	0.9833
EBF1	5	5:158395637	158395637	C	1.294	0.4146	0.8296	0.6944	1.727	0.1703
EBF1	5	5:158405843	158405843	C	1.157	0.3034	1.012	0.9587	1.274	0.1871
EBF1	5	5:158409804	158409804	A	0.822	0.1267	0.7146	0.11	0.8587	0.357
EBF1	5	5:158423745	158423745	A	1.191	0.2062	1.751	0.0133	0.9043	0.584
EBF1	5	5:158429424	158429424	T	0.6242	0.03623	0.4006	0.01595	0.8024	0.4258
EBF1	5	5:158437258	158437258	G	1.118	0.6069	1.067	0.8423	1.159	0.6033
EBF1	5	5:158437819	158437819	C	1.505	0.02864	2.108	0.01992	1.196	0.4504
EBF1	5	5:158441932	158441932	A	0.559	0.06483	0.4491	0.1064	0.6185	0.2378
EBF1	5	5:158442109	158442109	G	1.009	0.9603	0.9792	0.9458	1.101	0.6865
EBF1	5	5:158452214	158452214	T	1.254	0.6174	2.932	0.3221	0.8433	0.7647
EBF1	5	5:158459721	158459721	T	0.9659	0.8562	1.128	0.6859	0.8658	0.5761
EBF1	5	5:158460212	158460212	A	1.044	0.7638	1.327	0.2401	0.8875	0.5266
EBF1	5	5:158463229	158463229	T	0.8468	0.4042	0.9008	0.7486	0.8155	0.4299
EBF1	5	5:158475211	158475211	A	0.8245	0.3269	0.8503	0.6142	0.8069	0.3994
EBF1	5	5:158475986	158475986	C	0.9349	0.556	0.7843	0.2022	1.051	0.7294
EBF1	5	5:158476891	158476891	C	0.8722	0.2753	0.7549	0.176	0.9468	0.7297
EBF1	5	5:158498061	158498061	T	0.7232	0.1363	0.6161	0.1623	0.8124	0.4624
EBF1	5	5:158502378	158502378	T	0.9366	0.7053	0.8404	0.5367	1.039	0.8633
EBF1	5	5:158502944	158502944	T	1.382	0.1514	1.752	0.1262	1.131	0.6786
EBF1	5	5:158504140	158504140	C	0.8662	0.244	0.7762	0.1878	0.9612	0.8094
EBF1	5	5:158507676	158507676	A	0.8724	0.3189	0.7473	0.1965	0.9811	0.9134
EBF1	5	5:158510054	158510054	C	1.114	0.3555	1.299	0.1736	0.9909	0.9517
EBF1	5	5:158513125	158513125	G	1.084	0.4866	1.071	0.7091	1.122	0.4495
EBF1	5	5:158513831	158513831	C	1.133	0.2864	1.244	0.2592	1.042	0.7845
EBF1	5	5:158523250	158523250	G	1.674	0.1331	1.925	0.2099	1.397	0.4757
EBF1	5	5:158527507	158527507	T	1.762	0.1452	2.178	0.2852	1.71	0.2593
EBF1	5	5:158529135	158529135	C	1.007	0.9499	0.9332	0.7075	1.07	0.656
EBF1	5	5:158529996	158529996	T	0.8939	0.7494	1.214	0.7085	0.6545	0.4119
EBF1	5	5:158531430	158531430	A	1.676	0.135	0.8338	0.7298	2.66	0.02703
EBF1	5	5:158531711	158531711	T	0.9969	0.9793	0.9232	0.6874	1.071	0.6563
EBF1	5	5:158535034	158535034	C	0.8939	0.4483	0.7901	0.3336	0.9305	0.7021
SOX11	2	2:5843786	5843786	T	1.18	0.3922	1.72	0.09774	0.8263	0.4719
SOX11	2	2:5846843	5846843	A	1.275	0.3208	1.297	0.4996	1.389	0.3148
SOX11	2	2:5847065	5847065	C	0.4532	0.07501	0.5367	0.2834	0.3194	0.1558
SOX11	2	2:5847675	5847675	A	1.183	0.1551	1.379	0.09746	1.057	0.7152
SOX11	2	2:5847893	5847893	A	0.9036	0.3785	0.6722	0.03269	1.087	0.5803
SOX11	2	2:5849634	5849634	A	0.7877	0.2638	0.8225	0.5379	0.7889	0.4228
RNF187	1	1:228686159	228686159	A	2.465	0.05489	2.154	0.2858	2.959	0.08351
RNF187	1	1:228700450	228700450	C	0.8921	0.4006	0.8892	0.5992	0.9212	0.6349
RNF187	1	1:228700913	228700913	A	1.462	0.07665	1.156	0.6872	1.628	0.06767
RNF187	1	1:228702274	228702274	G	1.297	0.02497	1.139	0.4837	1.409	0.02361
RNF187	1	1:228703236	228703236	C	1.196	0.3572	0.9799	0.9482	1.296	0.2872
RNF187	1	1:228703289	228703289	A	0.6899	0.01885	0.8046	0.4104	0.6564	0.03766
RNF187	1	1:228705336	228705336	G	1.024	0.914	1.254	0.5506	0.9459	0.8412
RNF187	1	1:228705421	228705421	G	1.565	0.2096	1.543	0.4905	1.642	0.2511
RNF187	1	1:228707539	228707539	T	1.201	0.1831	1.33	0.1918	1.11	0.5636
ASAP1	8	8:131080411	131080411	C	0.9632	0.8229	0.8712	0.5965	1.031	0.8915
ASAP1	8	8:131080513	131080513	A	0.7444	0.1636	1.198	0.5812	0.528	0.03653
ASAP1	8	8:131083068	131083068	A	0.6921	0.008251	0.9319	0.7549	0.559	0.002263
ASAP1	8	8:131085652	131085652	A	2.145	0.04346	5.1	0.04965	1.559	0.3231
ASAP1	8	8:131086372	131086372	G	1.202	0.3484	1.072	0.8245	1.311	0.2782
ASAP1	8	8:131086734	131086734	C	2.116	0.07939	4.831	0.0598	1.517	0.4336
ASAP1	8	8:131092413	131092413	C	2.145	0.04346	5.1	0.04965	1.559	0.3231
ASAP1	8	8:131092724	131092724	T	1.031	0.8005	0.9414	0.7648	1.063	0.6885
ASAP1	8	8:131105932	131105932	G	0.9275	0.5799	0.8971	0.6469	0.9113	0.5826
ASAP1	8	8:131107094	131107094	C	1.376	0.2002	1.245	0.5779	1.471	0.2276
ASAP1	8	8:131108193	131108193	T	0.9972	0.9812	0.8959	0.5774	1.041	0.7875
ASAP1	8	8:131119429	131119429	C	1.061	0.6506	0.8467	0.4294	1.224	0.2325
ASAP1	8	8:131124559	131124559	T	1.052	0.655	0.9772	0.9028	0.9359	0.6421
ASAP1	8	8:131127831	131127831	G	0.9628	0.7403	1.038	0.8458	0.9548	0.7497
ASAP1	8	8:131129121	131129121	T	0.5171	0.2292	0.4092	0.2908	0.7521	0.6888
ASAP1	8	8:131130594	131130594	T	0.9065	0.3763	1.044	0.8117	0.8513	0.2604
ASAP1	8	8:131134797	131134797	C	2.176	0.04897	4.711	0.06465	1.588	0.3264
ASAP1	8	8:131135717	131135717	T	0.9367	0.7659	0.9556	0.8966	0.8906	0.6913
ASAP1	8	8:131144746	131144746	A	0.9169	0.4265	0.9022	0.5674	0.8298	0.1832
ASAP1	8	8:131156071	131156071	A	1.061	0.6435	1.072	0.7486	1.027	0.8673
ASAP1	8	8:131157002	131157002	A	0.9217	0.4583	0.9081	0.5928	0.8379	0.2121
ASAP1	8	8:131162455	131162455	G	2.153	0.09005	4.439	0.07841	1.55	0.4404
ASAP1	8	8:131165000	131165000	T	0.8699	0.7773	0.7777	0.7436	1.141	0.8354
ASAP1	8	8:131172968	131172968	C	1.058	0.6784	0.8923	0.6089	1.165	0.371
ASAP1	8	8:131176347	131176347	C	0.9988	0.9955	1.078	0.836	0.9048	0.7281
ASAP1	8	8:131226752	131226752	C	1.255	0.2483	0.9063	0.7489	1.57	0.07295
ASAP1	8	8:131247022	131247022	C	1.115	0.4173	0.883	0.5649	1.3	0.1274
ASAP1	8	8:131259140	131259140	A	2.657	0.005227	4.036	0.07577	2.139	0.05617
ASAP1	8	8:131265169	131265169	T	1.264	0.4548	1.165	0.8031	1.287	0.481
ASAP1	8	8:131265218	131265218	A	1.163	0.1645	1.002	0.9908	1.254	0.1002
ASAP1	8	8:131267087	131267087	A	0.6594	0.3375	0.8205	0.7811	0.5063	0.2423
ASAP1	8	8:131269886	131269886	G	1.242	0.1741	1.391	0.2309	1.176	0.4097
ASAP1	8	8:131275444	131275444	A	0.8127	0.2056	1.01	0.97	0.6876	0.08653
ASAP1	8	8:131278618	131278618	T	0.7327	0.1063	1.041	0.889	0.5617	0.03889
ASAP1	8	8:131282698	131282698	C	0.9668	0.9225	0.5754	0.3822	1.255	0.5838
ASAP1	8	8:131290664	131290664	G	0.8366	0.1073	0.9405	0.7375	0.7887	0.09466
ASAP1	8	8:131300036	131300036	T	1.004	0.9737	0.9323	0.7064	1.089	0.5793
ASAP1	8	8:131308122	131308122	G	1.058	0.8461	0.6708	0.4093	1.233	0.5518
ASAP1	8	8:131326131	131326131	T	1.21	0.3319	1.602	0.188	1.072	0.7719
ASAP1	8	8:131328302	131328302	C	1.07	0.557	0.9592	0.8246	1.143	0.3611
ASAP1	8	8:131333913	131333913	A	1.187	0.1256	1.002	0.9929	1.314	0.05623
ASAP1	8	8:131344095	131344095	C	0.7907	0.2736	0.8107	0.6045	0.7228	0.2122
ASAP1	8	8:131359020	131359020	A	2.194	0.04188	5.665	0.03465	1.494	0.3938
ASAP1	8	8:131360008	131360008	G	0.9178	0.5289	1.264	0.286	0.7273	0.08425
ASAP1	8	8:131372769	131372769	T	0.9592	0.8503	0.9364	0.8515	0.9429	0.8392
ASAP1	8	8:131388344	131388344	G	1.045	0.9204	1.854	0.4947	0.5851	0.3842
ASAP1	8	8:131391874	131391874	C	1.04	0.7525	0.9021	0.6031	1.107	0.525
ASAP1	8	8:131402429	131402429	C	0.6716	0.3882	0.6084	0.5096	0.6245	0.4302
ASAP1	8	8:131409885	131409885	A	1.056	0.6502	1.116	0.5654	1.044	0.7857
ASAP1	8	8:131413113	131413113	A	1.257	0.3911	1.338	0.5127	1.28	0.4619
ASAP1	8	8:131414912	131414912	A	0.9424	0.6082	0.9086	0.6073	0.9503	0.7361
ASAP1	8	8:131415179	131415179	A	0.9424	0.6082	0.9086	0.6073	0.9503	0.7361
ASAP1	8	8:131418029	131418029	A	1.099	0.5379	0.9875	0.9583	1.214	0.3371
ASAP1	8	8:131429868	131429868	C	0.9726	0.8936	1.103	0.771	0.9081	0.7249
ASAP1	8	8:131430912	131430912	A	1.007	0.976	1.031	0.9264	1.04	0.892
ASAP1	8	8:131430917	131430917	A	1.046	0.9141	1.466	0.5849	0.8842	0.8235
ASAP1	8	8:131436587	131436587	A	0.8964	0.3615	0.9609	0.8391	0.8434	0.2771
ASAP1	8	8:131440374	131440374	A	0.5739	0.07443	0.4634	0.1659	0.6336	0.2249
ASAP1	8	8:131454436	131454436	C	0.9468	0.7935	1.466	0.2704	0.7141	0.2391
ASAP1	8	8:131458703	131458703	A	0.8385	0.4075	0.6411	0.2067	0.9522	0.8545
ASAP1	8	8:131462945	131462945	T	0.8843	0.3571	0.7131	0.1173	1.038	0.8285
ASAP1	8	8:131465241	131465241	T	1.118	0.5141	1.45	0.2019	0.9725	0.8962
ASAP1	8	8:131465722	131465722	A	1.041	0.789	0.8225	0.4007	1.187	0.382
WT1	11	11:32426704	32426704	T	0.9339	0.5508	0.7862	0.1926	1.062	0.6849
WT1	11	11:32428164	32428164	T	0.9339	0.5508	0.7862	0.1926	1.062	0.6849
WT1	11	11:32434180	32434180	A	0.9253	0.4944	0.8178	0.2681	1.024	0.8734
WT1	11	11:32438684	32438684	A	0.8158	0.1969	0.7162	0.168	0.9308	0.7303
WT1	11	11:32444020	32444020	A	1.052	0.6539	1.118	0.554	1.034	0.8176
WT1	11	11:32446843	32446843	T	1.061	0.7961	1.007	0.9861	1.128	0.6786
WT1	11	11:32447864	32447864	A	1.088	0.505	1.097	0.663	1.033	0.8372
WT1	11	11:32453536	32453536	A	0.8781	0.2782	0.825	0.3383	0.9025	0.5018
WT1	11	11:32453622	32453622	A	1.051	0.6663	1.006	0.9749	1.072	0.649
WT1	11	11:32456085	32456085	T	1.029	0.9296	0.5796	0.2655	1.614	0.241
WT1	11	11:32457545	32457545	G	1.391	0.351	1.972	0.2068	1.195	0.7159
WT1	11	11:32458219	32458219	C	1.086	0.4765	1.275	0.2003	0.9769	0.8753
WT1	11	11:32459303	32459303	G	1.022	0.862	1.14	0.5251	0.9118	0.5621
WT1	11	11:32466649	32466649	T	0.9824	0.9005	0.9191	0.714	1.038	0.8367
WT1	11	11:32466931	32466931	C	1.563	0.2807	2.134	0.1706	1.289	0.7056
DYNC2H1	11	11:102991197	102991197	T	0.7768	0.1866	0.9526	0.8773	0.6615	0.1011
DYNC2H1	11	11:102992107	102992107	A	0.5103	0.1236	0.6454	0.4446	0.2878	0.1397
DYNC2H1	11	11:103027234	103027234	G	0.7897	0.2827	0.7141	0.3641	0.8362	0.5114
DYNC2H1	11	11:103029373	103029373	C	1.134	0.6329	0.6165	0.2372	1.649	0.1286
DYNC2H1	11	11:103029516	103029516	A	1.092	0.437	0.8686	0.4507	1.048	0.7462
DYNC2H1	11	11:103032398	103032398	A	0.456	0.1355	0.4232	0.3023	0.5466	0.3974
DYNC2H1	11	11:103032428	103032428	G	0.8902	0.3943	0.8024	0.3315	0.9721	0.87
DYNC2H1	11	11:103049102	103049102	A	0.918	0.7629	0.7476	0.5408	1.065	0.858
DYNC2H1	11	11:103051106	103051106	G	0.6783	0.3216	0.7447	0.6135	0.6656	0.4487
DYNC2H1	11	11:103052558	103052558	C	1.03	0.8862	1.444	0.3067	0.8284	0.4836
DYNC2H1	11	11:103056680	103056680	C	1.346	0.4016	0.7503	0.5969	1.926	0.1424
DYNC2H1	11	11:103062264	103062264	A	0.8812	0.7173	1.628	0.3907	0.4055	0.1063
DYNC2H1	11	11:103066685	103066685	A	0.5398	0.2144	0.6572	0.5437	0.4265	0.2868
DYNC2H1	11	11:103071344	103071344	G	0.8811	0.2553	0.7646	0.1471	0.9826	0.9013
DYNC2H1	11	11:103076010	103076010	G	2.342	0.08024	NA	NA	1.385	0.5643
DYNC2H1	11	11:103080205	103080205	T	1.194	0.3929	0.7988	0.4928	1.464	0.1453
DYNC2H1	11	11:103082590	103082590	G	1.152	0.2229	1.146	0.4771	1.136	0.3873
DYNC2H1	11	11:103087934	103087934	G	1.244	0.293	0.8441	0.6092	1.505	0.1151
DYNC2H1	11	11:103094982	103094982	T	1.179	0.1556	1.14	0.4927	1.188	0.2454
DYNC2H1	11	11:103101926	103101926	T	1.066	0.8459	0.8399	0.7393	1.223	0.6251
DYNC2H1	11	11:103104617	103104617	T	1.007	0.9871	4.146	0.1029	0.4708	0.2111
DYNC2H1	11	11:103104827	103104827	G	0.8106	0.6607	1.291	0.7202	0.3411	0.201
DYNC2H1	11	11:103114037	103114037	A	0.863	0.1837	0.7603	0.1348	0.9546	0.7414
DYNC2H1	11	11:103121473	103121473	C	0.9078	0.4456	0.8708	0.5005	0.9221	0.6217
DYNC2H1	11	11:103126969	103126969	G	1.645	0.2596	1.518	0.5948	1.678	0.3369
DYNC2H1	11	11:103137433	103137433	C	1.126	0.571	1.377	0.3656	0.9251	0.7766
DYNC2H1	11	11:103143805	103143805	T	1.238	0.1987	1.509	0.1615	1.087	0.6905
DYNC2H1	11	11:103154132	103154132	T	0.9374	0.8141	0.7726	0.539	1.072	0.8477
DYNC2H1	11	11:103154219	103154219	A	2.118	0.08744	5.753	0.1009	1.417	0.5131
DYNC2H1	11	11:103158278	103158278	T	0.9014	0.3682	0.9553	0.8046	0.8419	0.257
DYNC2H1	11	11:103167130	103167130	A	0.6144	0.3294	0.5339	0.4254	0.6346	0.5037
DYNC2H1	11	11:103176145	103176145	T	1.076	0.634	0.9184	0.7241	1.185	0.4021
DYNC2H1	11	11:103180445	103180445	T	0.8423	0.5209	0.8079	0.546	0.9379	0.8763
DYNC2H1	11	11:103183297	103183297	A	1.127	0.4412	0.9312	0.7692	1.273	0.2322
DYNC2H1	11	11:103183602	103183602	A	1.107	0.5145	0.9322	0.7784	1.227	0.3091
DYNC2H1	11	11:103185830	103185830	T	1.092	0.5688	0.9184	0.7241	1.213	0.3396
DYNC2H1	11	11:103185959	103185959	T	0.9332	0.6332	0.8722	0.5612	0.9982	0.9923
DYNC2H1	11	11:103188438	103188438	G	1.157	0.5091	1.201	0.6068	1.164	0.5929
DYNC2H1	11	11:103190054	103190054	C	1.348	0.02548	1.563	0.05322	1.285	0.1336
DYNC2H1	11	11:103192532	103192532	G	1.315	0.01936	1.161	0.4235	1.475	0.01163
DYNC2H1	11	11:103192549	103192549	C	1.282	0.03431	1.136	0.494	1.435	0.01964
DYNC2H1	11	11:103193779	103193779	T	1.181	0.1577	1.081	0.6722	1.273	0.1208
DYNC2H1	11	11:103200368	103200368	C	0.8566	0.6588	1.141	0.8228	0.7957	0.6087
DYNC2H1	11	11:103201737	103201737	G	1.16	0.6415	1.971	0.3079	0.9765	0.9505
DYNC2H1	11	11:103206205	103206205	C	1.228	0.1518	1.118	0.6245	1.299	0.1584
DYNC2H1	11	11:103210281	103210281	G	1.199	0.1617	1.136	0.5396	1.266	0.1601
DYNC2H1	11	11:103210300	103210300	T	1.245	0.0848	1.178	0.4298	1.312	0.09524
DYNC2H1	11	11:103210748	103210748	C	1.207	0.1469	1.097	0.6564	1.303	0.1147
DYNC2H1	11	11:103211153	103211153	A	1.199	0.1617	1.136	0.5396	1.266	0.1601
DYNC2H1	11	11:103216252	103216252	T	1.215	0.1363	1.147	0.5122	1.286	0.1358
DYNC2H1	11	11:103219230	103219230	C	0.8127	0.4348	0.6304	0.3192	0.9442	0.8614
DYNC2H1	11	11:103219906	103219906	A	1.312	0.02348	1.079	0.6851	1.55	0.005764
DYNC2H1	11	11:103229110	103229110	T	1.236	0.06843	1.064	0.7365	1.418	0.02267
DYNC2H1	11	11:103232223	103232223	G	1.252	0.05298	1.095	0.6188	1.407	0.02561
DYNC2H1	11	11:103232436	103232436	A	0.902	0.6425	0.9803	0.9594	0.8159	0.4665
DYNC2H1	11	11:103237027	103237027	A	1.148	0.5388	0.9721	0.9405	1.275	0.3802
DYNC2H1	11	11:103239170	103239170	T	0.5511	0.1722	0.906	0.8829	0.4106	0.1426
DYNC2H1	11	11:103249230	103249230	C	1.139	0.5876	1.08	0.8431	1.215	0.5235
DYNC2H1	11	11:103253696	103253696	T	1.085	0.5368	1.026	0.907	1.098	0.578
DYNC2H1	11	11:103255114	103255114	G	0.8433	0.1425	1.029	0.8726	0.7073	0.02762
DYNC2H1	11	11:103255896	103255896	A	0.7882	0.2358	0.7893	0.4598	0.7919	0.3781
DYNC2H1	11	11:103284179	103284179	T	1.034	0.9128	0.5766	0.2382	1.725	0.184
DYNC2H1	11	11:103295015	103295015	A	1.235	0.09004	1.017	0.9316	1.481	0.01704
DYNC2H1	11	11:103304381	103304381	A	1.235	0.09004	1.017	0.9316	1.481	0.01704
DYNC2H1	11	11:103307709	103307709	T	0.8827	0.2887	1.009	0.9585	0.7847	0.1273
DYNC2H1	11	11:103309088	103309088	G	0.9381	0.5835	0.9746	0.8911	0.8945	0.4587
DYNC2H1	11	11:103310238	103310238	A	1.105	0.4504	1.131	0.5704	1.144	0.4284
DYNC2H1	11	11:103310851	103310851	A	0.8933	0.6053	0.7495	0.3767	1.116	0.7053
DYNC2H1	11	11:103311923	103311923	G	0.7804	0.419	0.8579	0.7465	0.771	0.5223
DYNC2H1	11	11:103317283	103317283	A	0.8754	0.2326	0.9602	0.8217	0.8333	0.2051
DYNC2H1	11	11:103317718	103317718	C	0.8754	0.2326	0.9602	0.8217	0.8333	0.2051
DYNC2H1	11	11:103317749	103317749	C	0.8754	0.2326	0.9602	0.8217	0.8333	0.2051
DYNC2H1	11	11:103318103	103318103	G	0.8708	0.2188	0.9372	0.7208	0.8436	0.2423
DYNC2H1	11	11:103318108	103318108	C	0.8754	0.2326	0.9602	0.8217	0.8333	0.2051
DYNC2H1	11	11:103318329	103318329	T	1.117	0.3575	0.9556	0.8094	1.245	0.1644
DYNC2H1	11	11:103321116	103321116	T	0.8788	0.2436	0.9791	0.9057	0.8211	0.1695
DYNC2H1	11	11:103321133	103321133	G	0.8754	0.2326	0.9602	0.8217	0.8333	0.2051
DYNC2H1	11	11:103323596	103323596	G	0.9913	0.9516	1.04	0.8676	0.9278	0.6845
DYNC2H1	11	11:103325941	103325941	T	1.285	0.4916	1.472	0.576	1.232	0.6396
DYNC2H1	11	11:103326785	103326785	T	0.9785	0.8693	1.023	0.9148	0.9502	0.7617
DYNC2H1	11	11:103333385	103333385	G	0.981	0.9668	1.474	0.6499	0.7425	0.6074
DYNC2H1	11	11:103334643	103334643	A	1.171	0.2251	0.9381	0.7597	1.36	0.06725
DYNC2H1	11	11:103335225	103335225	A	0.7463	0.401	1.009	0.9869	0.5778	0.2556
DYNC2H1	11	11:103336939	103336939	C	0.929	0.832	1.127	0.8228	0.8906	0.8033
DYNC2H1	11	11:103339813	103339813	C	1.17	0.2012	1.051	0.8055	1.251	0.1516
DYNC2H1	11	11:103342939	103342939	G	1.029	0.8274	1.036	0.8691	1.025	0.8849
DYNC2H1	11	11:103343254	103343254	A	0.8345	0.1141	0.9025	0.589	0.791	0.1098
DYNC2H1	11	11:102991197	102991197	T	0.7768	0.1866	0.9526	0.8773	0.6615	0.1011
DYNC2H1	11	11:102992107	102992107	A	0.5103	0.1236	0.6454	0.4446	0.2878	0.1397
DYNC2H1	11	11:103027234	103027234	G	0.7897	0.2827	0.7141	0.3641	0.8362	0.5114
DYNC2H1	11	11:103029373	103029373	C	1.134	0.6329	0.6165	0.2372	1.649	0.1286
DYNC2H1	11	11:103029516	103029516	A	1.092	0.437	0.8686	0.4507	1.048	0.7462
DYNC2H1	11	11:103032398	103032398	A	0.456	0.1355	0.4232	0.3023	0.5466	0.3974
DYNC2H1	11	11:103032428	103032428	G	0.8902	0.3943	0.8024	0.3315	0.9721	0.87
DYNC2H1	11	11:103049102	103049102	A	0.918	0.7629	0.7476	0.5408	1.065	0.858
DYNC2H1	11	11:103051106	103051106	G	0.6783	0.3216	0.7447	0.6135	0.6656	0.4487
DYNC2H1	11	11:103052558	103052558	C	1.03	0.8862	1.444	0.3067	0.8284	0.4836
DYNC2H1	11	11:103056680	103056680	C	1.346	0.4016	0.7503	0.5969	1.926	0.1424
DYNC2H1	11	11:103062264	103062264	A	0.8812	0.7173	1.628	0.3907	0.4055	0.1063
DYNC2H1	11	11:103066685	103066685	A	0.5398	0.2144	0.6572	0.5437	0.4265	0.2868
DYNC2H1	11	11:103071344	103071344	G	0.8811	0.2553	0.7646	0.1471	0.9826	0.9013
DYNC2H1	11	11:103076010	103076010	G	2.342	0.08024	NA	NA	1.385	0.5643
DYNC2H1	11	11:103080205	103080205	T	1.194	0.3929	0.7988	0.4928	1.464	0.1453
DYNC2H1	11	11:103082590	103082590	G	1.152	0.2229	1.146	0.4771	1.136	0.3873
DYNC2H1	11	11:103087934	103087934	G	1.244	0.293	0.8441	0.6092	1.505	0.1151
DYNC2H1	11	11:103094982	103094982	T	1.179	0.1556	1.14	0.4927	1.188	0.2454
DYNC2H1	11	11:103101926	103101926	T	1.066	0.8459	0.8399	0.7393	1.223	0.6251
DYNC2H1	11	11:103104617	103104617	T	1.007	0.9871	4.146	0.1029	0.4708	0.2111
DYNC2H1	11	11:103104827	103104827	G	0.8106	0.6607	1.291	0.7202	0.3411	0.201
DYNC2H1	11	11:103114037	103114037	A	0.863	0.1837	0.7603	0.1348	0.9546	0.7414
DYNC2H1	11	11:103121473	103121473	C	0.9078	0.4456	0.8708	0.5005	0.9221	0.6217
DYNC2H1	11	11:103126969	103126969	G	1.645	0.2596	1.518	0.5948	1.678	0.3369
DYNC2H1	11	11:103137433	103137433	C	1.126	0.571	1.377	0.3656	0.9251	0.7766
DYNC2H1	11	11:103143805	103143805	T	1.238	0.1987	1.509	0.1615	1.087	0.6905
DYNC2H1	11	11:103154132	103154132	T	0.9374	0.8141	0.7726	0.539	1.072	0.8477
DYNC2H1	11	11:103154219	103154219	A	2.118	0.08744	5.753	0.1009	1.417	0.5131
DYNC2H1	11	11:103158278	103158278	T	0.9014	0.3682	0.9553	0.8046	0.8419	0.257
DYNC2H1	11	11:103167130	103167130	A	0.6144	0.3294	0.5339	0.4254	0.6346	0.5037
DYNC2H1	11	11:103176145	103176145	T	1.076	0.634	0.9184	0.7241	1.185	0.4021
DYNC2H1	11	11:103180445	103180445	T	0.8423	0.5209	0.8079	0.546	0.9379	0.8763
DYNC2H1	11	11:103183297	103183297	A	1.127	0.4412	0.9312	0.7692	1.273	0.2322
DYNC2H1	11	11:103183602	103183602	A	1.107	0.5145	0.9322	0.7784	1.227	0.3091
DYNC2H1	11	11:103185830	103185830	T	1.092	0.5688	0.9184	0.7241	1.213	0.3396
DYNC2H1	11	11:103185959	103185959	T	0.9332	0.6332	0.8722	0.5612	0.9982	0.9923
DYNC2H1	11	11:103188438	103188438	G	1.157	0.5091	1.201	0.6068	1.164	0.5929
DYNC2H1	11	11:103190054	103190054	C	1.348	0.02548	1.563	0.05322	1.285	0.1336
DYNC2H1	11	11:103192532	103192532	G	1.315	0.01936	1.161	0.4235	1.475	0.01163
DYNC2H1	11	11:103192549	103192549	C	1.282	0.03431	1.136	0.494	1.435	0.01964
DYNC2H1	11	11:103193779	103193779	T	1.181	0.1577	1.081	0.6722	1.273	0.1208
DYNC2H1	11	11:103200368	103200368	C	0.8566	0.6588	1.141	0.8228	0.7957	0.6087
DYNC2H1	11	11:103201737	103201737	G	1.16	0.6415	1.971	0.3079	0.9765	0.9505
DYNC2H1	11	11:103206205	103206205	C	1.228	0.1518	1.118	0.6245	1.299	0.1584
DYNC2H1	11	11:103210281	103210281	G	1.199	0.1617	1.136	0.5396	1.266	0.1601
DYNC2H1	11	11:103210300	103210300	T	1.245	0.0848	1.178	0.4298	1.312	0.09524
DYNC2H1	11	11:103210748	103210748	C	1.207	0.1469	1.097	0.6564	1.303	0.1147
DYNC2H1	11	11:103211153	103211153	A	1.199	0.1617	1.136	0.5396	1.266	0.1601
DYNC2H1	11	11:103216252	103216252	T	1.215	0.1363	1.147	0.5122	1.286	0.1358
DYNC2H1	11	11:103219230	103219230	C	0.8127	0.4348	0.6304	0.3192	0.9442	0.8614
DYNC2H1	11	11:103219906	103219906	A	1.312	0.02348	1.079	0.6851	1.55	0.005764
DYNC2H1	11	11:103229110	103229110	T	1.236	0.06843	1.064	0.7365	1.418	0.02267
DYNC2H1	11	11:103232223	103232223	G	1.252	0.05298	1.095	0.6188	1.407	0.02561
DYNC2H1	11	11:103232436	103232436	A	0.902	0.6425	0.9803	0.9594	0.8159	0.4665
DYNC2H1	11	11:103237027	103237027	A	1.148	0.5388	0.9721	0.9405	1.275	0.3802
DYNC2H1	11	11:103239170	103239170	T	0.5511	0.1722	0.906	0.8829	0.4106	0.1426
DYNC2H1	11	11:103249230	103249230	C	1.139	0.5876	1.08	0.8431	1.215	0.5235
DYNC2H1	11	11:103253696	103253696	T	1.085	0.5368	1.026	0.907	1.098	0.578
DYNC2H1	11	11:103255114	103255114	G	0.8433	0.1425	1.029	0.8726	0.7073	0.02762
DYNC2H1	11	11:103255896	103255896	A	0.7882	0.2358	0.7893	0.4598	0.7919	0.3781
DYNC2H1	11	11:103284179	103284179	T	1.034	0.9128	0.5766	0.2382	1.725	0.184
DYNC2H1	11	11:103295015	103295015	A	1.235	0.09004	1.017	0.9316	1.481	0.01704
DYNC2H1	11	11:103304381	103304381	A	1.235	0.09004	1.017	0.9316	1.481	0.01704
DYNC2H1	11	11:103307709	103307709	T	0.8827	0.2887	1.009	0.9585	0.7847	0.1273
DYNC2H1	11	11:103309088	103309088	G	0.9381	0.5835	0.9746	0.8911	0.8945	0.4587
DYNC2H1	11	11:103310238	103310238	A	1.105	0.4504	1.131	0.5704	1.144	0.4284
DYNC2H1	11	11:103310851	103310851	A	0.8933	0.6053	0.7495	0.3767	1.116	0.7053
DYNC2H1	11	11:103311923	103311923	G	0.7804	0.419	0.8579	0.7465	0.771	0.5223
DYNC2H1	11	11:103317283	103317283	A	0.8754	0.2326	0.9602	0.8217	0.8333	0.2051
DYNC2H1	11	11:103317718	103317718	C	0.8754	0.2326	0.9602	0.8217	0.8333	0.2051
DYNC2H1	11	11:103317749	103317749	C	0.8754	0.2326	0.9602	0.8217	0.8333	0.2051
DYNC2H1	11	11:103318103	103318103	G	0.8708	0.2188	0.9372	0.7208	0.8436	0.2423
DYNC2H1	11	11:103318108	103318108	C	0.8754	0.2326	0.9602	0.8217	0.8333	0.2051
DYNC2H1	11	11:103318329	103318329	T	1.117	0.3575	0.9556	0.8094	1.245	0.1644
DYNC2H1	11	11:103321116	103321116	T	0.8788	0.2436	0.9791	0.9057	0.8211	0.1695
DYNC2H1	11	11:103321133	103321133	G	0.8754	0.2326	0.9602	0.8217	0.8333	0.2051
DYNC2H1	11	11:103323596	103323596	G	0.9913	0.9516	1.04	0.8676	0.9278	0.6845
DYNC2H1	11	11:103325941	103325941	T	1.285	0.4916	1.472	0.576	1.232	0.6396
DYNC2H1	11	11:103326785	103326785	T	0.9785	0.8693	1.023	0.9148	0.9502	0.7617
DYNC2H1	11	11:103333385	103333385	G	0.981	0.9668	1.474	0.6499	0.7425	0.6074
DYNC2H1	11	11:103334643	103334643	A	1.171	0.2251	0.9381	0.7597	1.36	0.06725
DYNC2H1	11	11:103335225	103335225	A	0.7463	0.401	1.009	0.9869	0.5778	0.2556
DYNC2H1	11	11:103336939	103336939	C	0.929	0.832	1.127	0.8228	0.8906	0.8033
DYNC2H1	11	11:103339813	103339813	C	1.17	0.2012	1.051	0.8055	1.251	0.1516
DYNC2H1	11	11:103342939	103342939	G	1.029	0.8274	1.036	0.8691	1.025	0.8849
DYNC2H1	11	11:103343254	103343254	A	0.8345	0.1141	0.9025	0.589	0.791	0.1098
TXNDC4	9	9:102765010	102765010	G	0.9623	0.9405	2.232	0.3454	0.2629	0.2199
TXNDC4	9	9:102807279	102807279	A	0.8231	0.09937	0.7685	0.1723	0.88	0.4045
TXNDC4	9	9:102808685	102808685	G	1.005	0.9756	0.9031	0.6779	1.104	0.6236
TXNDC4	9	9:102813042	102813042	C	1.132	0.6479	0.7739	0.5712	1.478	0.2438
TXNDC4	9	9:102814450	102814450	T	1.133	0.6458	0.7748	0.5729	1.478	0.2438
TXNDC4	9	9:102825374	102825374	G	0.8553	0.2972	0.947	0.8102	0.824	0.3489
TXNDC4	9	9:102846630	102846630	T	1.041	0.7769	1.124	0.6089	0.9296	0.6902
TXNDC4	9	9:102855934	102855934	G	0.9478	0.7012	0.9804	0.9318	0.9458	0.7536
TXNDC4	9	9:102861613	102861613	G	0.986	0.9332	1.005	0.9841	1.002	0.992
TXNDC4	9	9:102868639	102868639	G	0.9561	0.8897	0.9068	0.8275	0.9484	0.916
CD53	1	1:111429504	111429504	A	0.9451	0.8387	1.032	0.9411	0.8524	0.6698
CD53	1	1:111430758	111430758	T	0.9654	0.7798	0.8602	0.4511	1.082	0.6334
CD53	1	1:111439902	111439902	C	1.101	0.3891	1.038	0.8355	1.11	0.4683
CD53	1	1:111445125	111445125	G	1.029	0.8934	1.072	0.8374	0.9323	0.8051
CD53	1	1:111449999	111449999	T	0.9653	0.7559	0.9936	0.9714	0.9519	0.7423
SMOC1	14	14:70356126	70356126	A	0.7825	0.2018	0.9198	0.7664	0.6747	0.1496
SMOC1	14	14:70357182	70357182	C	0.7451	0.06821	1.054	0.8303	0.5754	0.01506
SMOC1	14	14:70365924	70365924	C	1.042	0.7329	1.192	0.3801	0.9622	0.8022
SMOC1	14	14:70366409	70366409	T	1.042	0.7329	1.192	0.3801	0.9622	0.8022
SMOC1	14	14:70366437	70366437	G	1.253	0.1434	1.363	0.2456	1.206	0.3309
SMOC1	14	14:70373307	70373307	C	1.085	0.508	1.156	0.4701	1.023	0.8873
SMOC1	14	14:70376539	70376539	G	0.9516	0.7374	0.7931	0.3536	1.053	0.7801
SMOC1	14	14:70383017	70383017	T	0.8484	0.1488	0.989	0.9518	0.7586	0.06619
SMOC1	14	14:70383891	70383891	C	1.21	0.2819	1.305	0.3467	1.202	0.425
SMOC1	14	14:70384452	70384452	G	1.194	0.6513	0.7862	0.7055	1.495	0.408
SMOC1	14	14:70385611	70385611	G	0.8087	0.287	1.083	0.7876	0.5978	0.07574
SMOC1	14	14:70386500	70386500	T	1.471	0.1407	1.664	0.2856	1.433	0.2547
SMOC1	14	14:70386743	70386743	C	0.9963	0.9893	0.7811	0.5733	1.179	0.6431
SMOC1	14	14:70388563	70388563	G	1.09	0.7262	0.9938	0.988	1.119	0.7171
SMOC1	14	14:70392097	70392097	C	0.8658	0.3767	0.9717	0.9115	0.7807	0.251
SMOC1	14	14:70392564	70392564	A	1.52	0.02563	1.393	0.304	1.699	0.02425
SMOC1	14	14:70392906	70392906	G	0.6061	0.1274	0.7387	0.5566	0.5542	0.1774
SMOC1	14	14:70393784	70393784	C	1.018	0.9626	0.9577	0.9409	1.107	0.8375
SMOC1	14	14:70395329	70395329	T	1.838	0.04013	1.288	0.5743	2.517	0.01976
SMOC1	14	14:70397034	70397034	T	1.381	0.05176	1.199	0.5129	1.558	0.03443
SMOC1	14	14:70398046	70398046	A	1.259	0.111	1.29	0.297	1.29	0.1605
SMOC1	14	14:70398134	70398134	A	0.9904	0.9791	0.6981	0.5238	1.556	0.3935
SMOC1	14	14:70401430	70401430	G	0.7084	0.2267	0.6277	0.3296	0.7658	0.4513
SMOC1	14	14:70401814	70401814	T	0.8677	0.2828	1.102	0.6531	0.7215	0.06103
SMOC1	14	14:70403304	70403304	T	0.9576	0.7006	0.806	0.2436	1.078	0.6042
SMOC1	14	14:70406571	70406571	G	1.099	0.4239	1.144	0.4685	1.064	0.6887
SMOC1	14	14:70407769	70407769	T	1.161	0.1731	1.036	0.8411	1.25	0.1241
SMOC1	14	14:70411090	70411090	T	1.082	0.5205	1.036	0.8543	1.127	0.4603
SMOC1	14	14:70412294	70412294	A	0.7222	0.4817	0.3384	0.1585	0.9118	0.869
SMOC1	14	14:70416718	70416718	G	0.9742	0.8151	0.8791	0.475	1.086	0.5707
SMOC1	14	14:70422682	70422682	G	1.015	0.8938	1.172	0.3714	1.161	0.2912
SMOC1	14	14:70429865	70429865	C	0.8265	0.6537	1.056	0.936	0.576	0.3667
SMOC1	14	14:70430630	70430630	T	1.196	0.6414	1.763	0.374	0.9845	0.9761
SMOC1	14	14:70430920	70430920	G	0.8024	0.4076	0.8317	0.6721	0.7736	0.4595
SMOC1	14	14:70432121	70432121	A	0.8611	0.461	1.25	0.5027	0.6249	0.08891
SMOC1	14	14:70433652	70433652	G	0.8272	0.7057	0.5822	0.4622	1.111	0.8765
SMOC1	14	14:70434279	70434279	G	0.9825	0.9683	1.575	0.6124	0.8412	0.7442
SMOC1	14	14:70436711	70436711	G	1.317	0.4168	1.119	0.8717	1.436	0.3445
SMOC1	14	14:70438887	70438887	G	0.7334	0.4435	0.88	0.8654	0.727	0.5117
SMOC1	14	14:70439185	70439185	C	1.013	0.9153	0.8815	0.5019	1.167	0.3254
SMOC1	14	14:70442350	70442350	C	1.18	0.4028	1.873	0.08945	0.9206	0.7413
SMOC1	14	14:70448865	70448865	G	0.6412	0.04269	0.4888	0.04301	0.7753	0.3606
SMOC1	14	14:70449675	70449675	T	1.216	0.2078	1.213	0.4574	1.2	0.3554
SMOC1	14	14:70450022	70450022	T	0.7945	0.2654	0.6691	0.205	0.8866	0.6594
SMOC1	14	14:70450219	70450219	T	1.284	0.07817	1.405	0.1698	1.214	0.2725
SMOC1	14	14:70450371	70450371	C	0.9626	0.7538	0.9059	0.6256	1.001	0.9937
SMOC1	14	14:70450908	70450908	G	0.7851	0.3514	1.06	0.8831	0.5788	0.1494
SMOC1	14	14:70454784	70454784	A	0.9851	0.9659	0.7591	0.6595	1.138	0.7566
SMOC1	14	14:70456804	70456804	T	0.9781	0.86	0.9359	0.7391	1.018	0.9154
SMOC1	14	14:70457691	70457691	C	1.583	0.009385	1.541	0.1563	1.562	0.04343
SMOC1	14	14:70460031	70460031	C	0.9432	0.5995	1.068	0.7162	0.8714	0.3407
SMOC1	14	14:70462361	70462361	C	0.9631	0.7353	1.025	0.8917	0.9289	0.6095
SMOC1	14	14:70463494	70463494	G	0.8512	0.49	0.6128	0.1765	1.059	0.8478
SMOC1	14	14:70463496	70463496	A	1.758	0.2266	0.9929	0.9918	3.351	0.06279
SMOC1	14	14:70465160	70465160	T	1.478	0.3054	1.512	0.5137	1.59	0.3462
SMOC1	14	14:70474008	70474008	A	0.8746	0.3	1.072	0.7423	0.7497	0.08774
SMOC1	14	14:70474207	70474207	A	1.028	0.8097	1.173	0.4025	0.9202	0.579
SMOC1	14	14:70477508	70477508	T	0.8395	0.3237	0.9923	0.979	0.7375	0.1802
SMOC1	14	14:70478230	70478230	A	0.9255	0.8537	0.6067	0.5183	1.119	0.8181
SMOC1	14	14:70479157	70479157	G	1.46	0.0179	1.294	0.3338	1.546	0.02936
SMOC1	14	14:70482433	70482433	T	1.057	0.7026	0.897	0.6309	1.198	0.3398
SMOC1	14	14:70483707	70483707	T	0.8288	0.4743	1.019	0.9644	0.6565	0.2342
SMOC1	14	14:70486548	70486548	G	0.7947	0.2813	0.6159	0.1595	0.9599	0.8792
SMOC1	14	14:70487596	70487596	C	0.9451	0.7375	0.8907	0.6781	0.9691	0.8834
SMOC1	14	14:70487910	70487910	T	0.8297	0.4393	0.8933	0.7736	0.8112	0.5046
SMOC1	14	14:70489775	70489775	G	1.308	0.3341	1.291	0.5903	1.191	0.6208
SMOC1	14	14:70490264	70490264	C	1.023	0.8456	1.226	0.278	0.9037	0.5036
SMOC1	14	14:70492846	70492846	T	0.8913	0.3627	1.122	0.5838	0.7455	0.07289
SMOC1	14	14:70494198	70494198	C	1.198	0.3441	1.262	0.4836	1.19	0.4578
SMOC1	14	14:70495371	70495371	G	0.8202	0.2009	0.966	0.8945	0.7274	0.1077
SMOC1	14	14:70502050	70502050	A	0.4504	0.06357	0.1258	0.009058	1.257	0.6766
SMOC1	14	14:70505003	70505003	C	1.544	0.317	0.8439	0.8182	1.981	0.186
ZFPM2	8	8:106342766	106342766	A	0.4971	0.001224	0.4756	0.02762	0.5361	0.03093
ZFPM2	8	8:106347897	106347897	A	1.858	0.2253	9.719	0.04064	0.7184	0.6515
ZFPM2	8	8:106348918	106348918	T	0.847	0.14	0.5527	0.001594	1.142	0.3627
ZFPM2	8	8:106348959	106348959	C	1.144	0.7194	0.2686	0.07011	1.777	0.1587
ZFPM2	8	8:106351998	106351998	G	1.281	0.2433	2.221	0.03692	0.9383	0.8149
ZFPM2	8	8:106360016	106360016	C	0.2777	0.01292	0.08498	0.007413	0.4775	0.2175
ZFPM2	8	8:106373747	106373747	C	1.089	0.6734	0.7384	0.3714	1.278	0.3262
ZFPM2	8	8:106377879	106377879	G	0.9955	0.9885	3.382	0.05737	0.6416	0.2724
ZFPM2	8	8:106377941	106377941	T	0.9119	0.6675	1.261	0.4837	0.7242	0.2721
ZFPM2	8	8:106382085	106382085	A	1.959	0.2227	0.5598	0.4859	4.625	0.0384
ZFPM2	8	8:106386119	106386119	C	1.185	0.2917	1.733	0.03817	0.8586	0.482
ZFPM2	8	8:106404314	106404314	G	1.141	0.6418	0.6936	0.4213	1.52	0.2385
ZFPM2	8	8:106407594	106407594	A	1.287	0.5348	2.331	0.2588	0.795	0.6622
ZFPM2	8	8:106415040	106415040	T	0.4139	0.06828	0.3112	0.08966	0.5049	0.3196
ZFPM2	8	8:106417508	106417508	A	0.3094	0.003312	0.1437	0.004146	0.4826	0.1288
ZFPM2	8	8:106425083	106425083	C	0.9498	0.8393	0.9337	0.8716	0.9293	0.8195
ZFPM2	8	8:106425230	106425230	A	0.7699	0.5477	0.147	0.09095	1.25	0.6458
ZFPM2	8	8:106427309	106427309	G	0.9568	0.919	0.672	0.4938	1.644	0.4654
ZFPM2	8	8:106438064	106438064	A	0.6872	0.103	0.4227	0.02146	0.965	0.903
ZFPM2	8	8:106438904	106438904	A	1.594	0.4421	0.9128	0.9299	1.918	0.3743
ZFPM2	8	8:106440553	106440553	C	1.155	0.3776	0.758	0.3356	1.44	0.06514
ZFPM2	8	8:106445396	106445396	A	0.9653	0.8812	0.7403	0.4074	1.128	0.7021
ZFPM2	8	8:106446384	106446384	G	0.7337	0.5405	0.6758	0.6469	0.7799	0.6948
ZFPM2	8	8:106459619	106459619	G	0.5121	0.04957	0.2089	0.004439	0.9408	0.8872
ZFPM2	8	8:106464326	106464326	T	0.2545	0.004091	0.1336	0.008258	0.3906	0.1173
ZFPM2	8	8:106468400	106468400	G	1.189	0.7188	0.822	0.802	1.53	0.4845
ZFPM2	8	8:106468592	106468592	C	1.037	0.7438	0.928	0.6778	1.163	0.3016
ZFPM2	8	8:106478390	106478390	A	1.224	0.533	1.724	0.3688	1.035	0.9313
ZFPM2	8	8:106480723	106480723	T	2.272	0.1186	1.534	0.6591	2.515	0.1358
ZFPM2	8	8:106482105	106482105	G	1.153	0.246	1.179	0.3902	1.138	0.4228
ZFPM2	8	8:106485117	106485117	T	0.8102	0.3758	0.7081	0.3399	1.027	0.9342
ZFPM2	8	8:106489763	106489763	A	1.222	0.4408	0.6877	0.388	1.647	0.1183
ZFPM2	8	8:106501425	106501425	T	1.144	0.7506	3.251	0.159	0.6111	0.4108
ZFPM2	8	8:106504609	106504609	G	1.311	0.3817	1.439	0.4917	1.19	0.6506
ZFPM2	8	8:106505433	106505433	G	1.029	0.9367	2.411	0.2568	0.8541	0.7109
ZFPM2	8	8:106505580	106505580	T	1.15	0.5624	0.7228	0.3694	1.598	0.1449
ZFPM2	8	8:106505971	106505971	A	1.098	0.4541	1.162	0.4563	1	0.9978
ZFPM2	8	8:106511742	106511742	G	0.6774	0.3808	0.6074	0.5324	0.7448	0.5892
ZFPM2	8	8:106513301	106513301	G	0.9632	0.7412	0.6443	0.01775	1.286	0.09005
ZFPM2	8	8:106515115	106515115	C	0.8668	0.3443	0.9369	0.779	0.8252	0.3494
ZFPM2	8	8:106521845	106521845	A	1.01	0.9298	0.7574	0.1221	0.8076	0.1498
ZFPM2	8	8:106522102	106522102	T	1.712	0.1979	4.582	0.07585	1.103	0.851
ZFPM2	8	8:106522641	106522641	G	0.9879	0.9176	0.8676	0.4582	1.063	0.6905
ZFPM2	8	8:106524029	106524029	T	1.017	0.9607	0.6045	0.3515	1.374	0.446
ZFPM2	8	8:106526565	106526565	T	0.6605	0.1394	0.449	0.08914	0.873	0.6973
ZFPM2	8	8:106527098	106527098	T	0.9561	0.8505	2.344	0.03476	0.4584	0.03289
ZFPM2	8	8:106529045	106529045	G	0.9911	0.9375	1.004	0.9822	0.9409	0.6882
ZFPM2	8	8:106532470	106532470	A	1.041	0.7207	0.8394	0.3245	0.7977	0.1278
ZFPM2	8	8:106535260	106535260	G	0.8362	0.3102	0.7433	0.3028	0.8863	0.5961
ZFPM2	8	8:106536813	106536813	C	0.6425	0.18	0.5131	0.2129	0.769	0.5366
ZFPM2	8	8:106537490	106537490	G	1.081	0.6814	3.14	0.0009255	0.4848	0.01242
ZFPM2	8	8:106537986	106537986	T	0.8895	0.5411	0.879	0.6751	0.8635	0.5621
ZFPM2	8	8:106539688	106539688	C	1.027	0.9472	1.296	0.6634	0.758	0.6497
ZFPM2	8	8:106542511	106542511	A	1.164	0.6917	1.236	0.7566	1.167	0.7416
ZFPM2	8	8:106545243	106545243	G	1.164	0.6917	1.236	0.7566	1.167	0.7416
ZFPM2	8	8:106545714	106545714	A	0.9446	0.8668	0.8802	0.8081	0.8581	0.7401
ZFPM2	8	8:106550935	106550935	C	1.169	0.6253	1.096	0.8602	1.179	0.6908
ZFPM2	8	8:106553488	106553488	C	0.9281	0.6902	0.8205	0.5209	0.9599	0.8644
ZFPM2	8	8:106554791	106554791	G	0.7572	0.2822	0.6132	0.2132	0.9773	0.947
ZFPM2	8	8:106556417	106556417	G	0.9607	0.9407	1.148	0.88	0.7632	0.7058
ZFPM2	8	8:106558235	106558235	T	1.174	0.418	1.031	0.9243	1.302	0.2987
ZFPM2	8	8:106558811	106558811	C	0.931	0.7058	0.8077	0.4852	1.011	0.9656
ZFPM2	8	8:106560333	106560333	A	0.9919	0.9873	1.155	0.8722	0.8193	0.7623
ZFPM2	8	8:106564123	106564123	T	1.161	0.7343	0.4058	0.2173	2.275	0.1385
ZFPM2	8	8:106564191	106564191	T	1.174	0.4531	1.097	0.794	1.238	0.4275
ZFPM2	8	8:106564219	106564219	A	1.19	0.523	1.019	0.966	1.248	0.515
ZFPM2	8	8:106564889	106564889	A	0.8132	0.422	0.6391	0.2757	1.035	0.9175
ZFPM2	8	8:106565414	106565414	A	1.041	0.7235	1.05	0.7848	1.09	0.5612
ZFPM2	8	8:106567442	106567442	T	0.6351	0.3765	0.2097	0.08348	1.227	0.7475
ZFPM2	8	8:106573309	106573309	C	1.107	0.3802	1.221	0.2921	1.093	0.553
ZFPM2	8	8:106573578	106573578	C	1.025	0.833	1.152	0.4533	0.9182	0.5856
ZFPM2	8	8:106583124	106583124	G	0.9515	0.6738	0.6137	0.01281	1.311	0.07449
ZFPM2	8	8:106587719	106587719	A	1.421	0.1282	3.359	0.003726	0.7301	0.3498
ZFPM2	8	8:106590705	106590705	A	0.9791	0.8555	0.8138	0.2731	1.163	0.314
ZFPM2	8	8:106590851	106590851	T	0.9267	0.5139	0.976	0.8972	0.8758	0.3818
ZFPM2	8	8:106591802	106591802	A	1.038	0.7369	1.408	0.05556	0.8138	0.1636
ZFPM2	8	8:106593558	106593558	G	1.102	0.4021	1.351	0.112	0.929	0.6284
ZFPM2	8	8:106594042	106594042	T	2.412	0.0886	1.928	0.5575	2.236	0.1656
ZFPM2	8	8:106594322	106594322	C	0.6218	0.08873	0.3546	0.0147	0.9569	0.9036
ZFPM2	8	8:106594719	106594719	G	0.9033	0.4318	0.7433	0.1566	1.019	0.9103
ZFPM2	8	8:106594830	106594830	A	1.496	0.2541	1.823	0.3381	1.298	0.557
ZFPM2	8	8:106600274	106600274	A	1.225	0.1786	1.353	0.2309	1.123	0.5423
ZFPM2	8	8:106603191	106603191	T	1.019	0.9596	2.489	0.1865	0.5967	0.2953
ZFPM2	8	8:106606375	106606375	A	1.383	0.0723	2.174	0.009251	0.9764	0.9223
ZFPM2	8	8:106609827	106609827	C	1.277	0.2884	0.9017	0.7893	1.506	0.1496
ZFPM2	8	8:106610293	106610293	A	1.594	0.09454	1.617	0.3187	1.576	0.1878
ZFPM2	8	8:106615577	106615577	G	0.6577	0.1427	0.5195	0.1773	0.771	0.4621
ZFPM2	8	8:106616618	106616618	A	0.9083	0.6018	0.9063	0.7322	0.8973	0.6575
ZFPM2	8	8:106621375	106621375	C	0.8891	0.553	0.8154	0.5179	1.004	0.9879
ZFPM2	8	8:106625030	106625030	C	0.8656	0.5117	1.579	0.2311	0.5782	0.06417
ZFPM2	8	8:106627197	106627197	G	0.7685	0.02361	0.6146	0.008548	0.9003	0.4918
ZFPM2	8	8:106628965	106628965	G	0.8578	0.2637	0.7489	0.2035	0.903	0.557
ZFPM2	8	8:106638199	106638199	A	0.8369	0.1752	0.7229	0.1246	0.9126	0.5886
ZFPM2	8	8:106643153	106643153	C	0.6414	0.1305	0.5621	0.1765	0.6492	0.2979
ZFPM2	8	8:106645960	106645960	A	0.7491	0.3638	0.5113	0.1867	1.064	0.878
ZFPM2	8	8:106654054	106654054	G	0.7196	0.01356	0.672	0.06928	0.7476	0.08645
ZFPM2	8	8:106654804	106654804	G	1.427	0.1853	3.33	0.02105	0.8966	0.7567
ZFPM2	8	8:106656073	106656073	G	0.7167	0.1177	0.767	0.4137	0.6303	0.1154
ZFPM2	8	8:106658578	106658578	A	0.9642	0.7586	0.9349	0.7196	0.9974	0.987
ZFPM2	8	8:106658883	106658883	A	1.361	0.5193	0.9581	0.9567	1.844	0.3172
ZFPM2	8	8:106663315	106663315	T	1.108	0.592	1.331	0.343	0.9158	0.7333
ZFPM2	8	8:106663533	106663533	G	2.322	0.06155	1.292	0.7268	3.157	0.04121
ZFPM2	8	8:106664517	106664517	C	0.9373	0.5647	1.061	0.7407	0.8635	0.3265
ZFPM2	8	8:106664873	106664873	T	1.199	0.3238	0.6704	0.1932	1.564	0.04809
ZFPM2	8	8:106665439	106665439	A	0.9266	0.4992	1.062	0.7356	0.8439	0.2594
ZFPM2	8	8:106667803	106667803	G	0.9416	0.7293	1.153	0.597	0.8431	0.4769
ZFPM2	8	8:106670535	106670535	T	0.9371	0.5664	1.097	0.604	0.8484	0.2756
ZFPM2	8	8:106672516	106672516	T	0.8095	0.3913	1.272	0.5472	0.568	0.1088
ZFPM2	8	8:106673287	106673287	T	1.167	0.5941	0.5584	0.2734	1.578	0.1873
ZFPM2	8	8:106674951	106674951	T	0.9541	0.8402	0.8759	0.7195	1.066	0.8329
ZFPM2	8	8:106675470	106675470	G	1.059	0.7405	1.41	0.2474	0.8251	0.4006
ZFPM2	8	8:106675666	106675666	C	1.006	0.9647	0.7926	0.2509	1.217	0.27
ZFPM2	8	8:106677573	106677573	A	0.9294	0.7938	1.03	0.9455	0.7532	0.4647
ZFPM2	8	8:106681764	106681764	G	0.9051	0.4903	0.8562	0.501	0.9099	0.6142
ZFPM2	8	8:106682915	106682915	C	1.052	0.9018	2.035	0.2621	0.4959	0.302
ZFPM2	8	8:106684811	106684811	A	0.8633	0.3229	0.8653	0.5343	0.8511	0.4129
ZFPM2	8	8:106688398	106688398	T	1.45	0.1125	2.197	0.04664	1.226	0.5055
ZFPM2	8	8:106689390	106689390	G	0.9985	0.9966	0.8658	0.7982	1.123	0.7965
ZFPM2	8	8:106692739	106692739	A	0.6861	0.2718	0.7725	0.6316	0.5955	0.2838
ZFPM2	8	8:106702829	106702829	T	1.528	0.4204	1.301	0.7546	1.577	0.495
ZFPM2	8	8:106705586	106705586	A	1.46	0.3146	1.069	0.9123	1.879	0.1786
ZFPM2	8	8:106707739	106707739	C	1.226	0.1724	1.225	0.4278	1.233	0.2529
ZFPM2	8	8:106707944	106707944	A	1.145	0.2447	1.276	0.1825	1.053	0.7382
ZFPM2	8	8:106708124	106708124	A	0.9491	0.8791	0.8079	0.6829	1.258	0.624
ZFPM2	8	8:106708558	106708558	T	0.7325	0.09745	0.9671	0.9043	0.5224	0.01856
ZFPM2	8	8:106708952	106708952	G	1.332	0.1306	1.19	0.5934	1.493	0.08852
ZFPM2	8	8:106714520	106714520	T	0.9594	0.9132	2	0.2696	0.5965	0.341
ZFPM2	8	8:106715767	106715767	C	1.146	0.2701	1.237	0.3033	1.122	0.4627
ZFPM2	8	8:106719773	106719773	A	1.161	0.1977	1.107	0.5932	1.187	0.2469
ZFPM2	8	8:106720087	106720087	C	1.109	0.361	1.302	0.1531	1.002	0.9873
ZFPM2	8	8:106721766	106721766	T	1.079	0.6402	1.129	0.6372	1.025	0.9087
ZFPM2	8	8:106722940	106722940	G	0.6698	0.08246	0.434	0.01788	0.9416	0.8454
ZFPM2	8	8:106723924	106723924	C	0.8699	0.2224	0.8529	0.4021	0.8813	0.3871
ZFPM2	8	8:106723932	106723932	C	1.465	0.05605	1.248	0.4991	1.558	0.07883
ZFPM2	8	8:106723969	106723969	G	0.6948	0.3051	0.4939	0.2403	0.8635	0.7373
ZFPM2	8	8:106724103	106724103	G	1.55	0.03629	1.12	0.7423	1.748	0.03126
ZFPM2	8	8:106724711	106724711	T	0.936	0.5742	0.9727	0.8846	0.9263	0.6181
ZFPM2	8	8:106725186	106725186	T	1.19	0.1324	1.298	0.1652	1.111	0.4781
ZFPM2	8	8:106729039	106729039	A	0.8795	0.2707	0.8643	0.4297	0.902	0.5005
ZFPM2	8	8:106730028	106730028	A	0.9597	0.8144	1.077	0.7802	0.8875	0.6247
ZFPM2	8	8:106730235	106730235	C	0.9805	0.895	0.8918	0.631	1.033	0.8671
ZFPM2	8	8:106730875	106730875	T	0.4949	0.09861	0.3226	0.07624	0.7528	0.6363
ZFPM2	8	8:106733344	106733344	T	1.29	0.0446	1.342	0.1551	1.22	0.2232
ZFPM2	8	8:106739564	106739564	A	0.5468	0.09127	0.8674	0.8106	0.4518	0.09759
ZFPM2	8	8:106743004	106743004	T	0.791	0.1891	0.7015	0.2246	0.868	0.5341
ZFPM2	8	8:106748701	106748701	G	0.9534	0.866	0.9905	0.9815	0.948	0.891
ZFPM2	8	8:106752934	106752934	C	1.068	0.6338	1.104	0.6452	1.008	0.9652
ZFPM2	8	8:106753235	106753235	T	0.3643	0.0302	0.2529	0.05173	0.438	0.1928
ZFPM2	8	8:106763115	106763115	A	0.9138	0.5457	1.078	0.7455	0.7726	0.2043
ZFPM2	8	8:106763729	106763729	G	1.297	0.1327	1.378	0.2574	1.189	0.433
ZFPM2	8	8:106772453	106772453	T	1.029	0.807	0.9715	0.879	1.078	0.6137
ZFPM2	8	8:106776370	106776370	G	0.7831	0.2526	0.6271	0.1712	0.9824	0.949
ZFPM2	8	8:106778064	106778064	T	0.9608	0.7224	0.9463	0.759	0.9416	0.6812
ZFPM2	8	8:106786603	106786603	T	1.358	0.4043	0.8562	0.7715	1.683	0.2792
ZFPM2	8	8:106787935	106787935	C	1.41	0.3125	2.106	0.2629	1.215	0.6328
ZFPM2	8	8:106789547	106789547	A	1.02	0.965	1.372	0.685	0.7575	0.631
ZFPM2	8	8:106796982	106796982	T	0.7091	0.2152	1.242	0.6353	0.4397	0.04071
ZFPM2	8	8:106797346	106797346	A	0.7717	0.06315	0.7353	0.1778	0.7673	0.1467
ZFPM2	8	8:106797565	106797565	A	0.7704	0.05721	0.723	0.1449	0.7668	0.142
ZFPM2	8	8:106798675	106798675	G	0.7717	0.06315	0.7353	0.1778	0.7673	0.1467
ZFPM2	8	8:106799669	106799669	C	1.177	0.6087	1.181	0.7754	1.127	0.7547
ZFPM2	8	8:106808005	106808005	T	0.7932	0.09917	0.7676	0.2505	0.776	0.1672
ZFPM2	8	8:106809769	106809769	C	0.7482	0.4386	0.6794	0.4825	0.9247	0.8812
ZFPM2	8	8:106810790	106810790	A	0.8719	0.637	1.32	0.5408	0.5664	0.1911
ZFPM2	8	8:106812366	106812366	G	0.9007	0.755	0.4881	0.2782	1.21	0.6159
ZFPM2	8	8:106813518	106813518	G	0.8393	0.1324	0.7345	0.1102	0.8991	0.4734
ZFPM2	8	8:106813672	106813672	G	0.8164	0.0888	0.7089	0.082	0.8819	0.4097
ZFPM2	8	8:106814086	106814086	C	0.8963	0.4362	0.874	0.5612	0.8743	0.4592
ZFPM2	8	8:106814279	106814279	G	0.926	0.6415	0.8402	0.513	1.01	0.9642
ZFPM2	8	8:106814407	106814407	T	0.5635	0.1678	0.8008	0.7721	0.4996	0.2019
ZFPM2	8	8:106814656	106814656	C	0.7481	0.3047	1.208	0.6313	0.3556	0.04349
ZFPM2	8	8:106814695	106814695	G	0.8963	0.4362	0.874	0.5612	0.8743	0.4592
ZFPM2	8	8:106814811	106814811	G	0.7953	0.4793	0.4517	0.2082	1.16	0.691
ZFPM2	8	8:106815286	106815286	C	0.8963	0.4362	0.874	0.5612	0.8743	0.4592
ZFPM2	8	8:106815474	106815474	T	0.834	0.2049	0.7	0.1282	0.9561	0.8079
ZFPM2	8	8:106815517	106815517	T	0.8164	0.0888	0.7089	0.082	0.8819	0.4097
ZFPM2	8	8:106815679	106815679	G	0.8629	0.299	0.7333	0.1846	0.9756	0.892
ZFPM2	8	8:106815820	106815820	G	0.834	0.2049	0.7	0.1282	0.9561	0.8079
ZFPM2	8	8:106815856	106815856	G	0.8164	0.0888	0.7089	0.082	0.8819	0.4097
ZFPM2	8	8:106816281	106816281	C	0.8164	0.0888	0.7089	0.082	0.8819	0.4097
ZFPM2	8	8:106817873	106817873	G	1.192	0.7223	1.091	0.9241	1.084	0.8937
ZFPM2	8	8:106820853	106820853	G	1.102	0.8136	0.7115	0.5417	1.705	0.3789
ZFPM2	8	8:106823617	106823617	T	1.267	0.4018	1.261	0.6364	1.19	0.6156
PCDH10	4	4:134081686	134081686	G	1.111	0.3457	0.8134	0.252	1.054	0.7204
PCDH10	4	4:134082320	134082320	A	1.199	0.2411	1.269	0.3376	1.244	0.2749
PCDH10	4	4:134083486	134083486	C	1.185	0.2577	1.155	0.5449	1.164	0.4407
PCDH10	4	4:134085786	134085786	T	1.47	0.3302	5.794	0.1156	1	0.9999
PCDH10	4	4:134086774	134086774	C	0.7406	0.4562	2.995	0.1604	0.3854	0.09711
PCDH10	4	4:134091734	134091734	A	1.024	0.9049	1.143	0.6929	0.956	0.8621
PCDH10	4	4:134099312	134099312	C	3.089	0.04426	2.511	0.3099	3.576	0.0762
PCDH10	4	4:134102516	134102516	C	1.263	0.6529	1.269	0.7926	1.095	0.891
PCDH10	4	4:134113117	134113117	C	0.8309	0.3969	0.8253	0.5724	0.8263	0.5093
PCDH10	4	4:134113153	134113153	C	1.201	0.4028	1.292	0.5149	1.169	0.5594
PCDH10	4	4:134114182	134114182	A	0.9699	0.8835	1.079	0.8248	0.8798	0.6307
PCDH10	4	4:134115095	134115095	C	0.9935	0.9802	0.9685	0.9356	1.081	0.8255
PCDH10	4	4:134118077	134118077	T	0.9325	0.7221	0.9769	0.9427	0.8745	0.5912
PCDH10	4	4:134120109	134120109	C	1.053	0.6512	1.052	0.7847	1.063	0.676
CCL17	16	16:57450780	57450780	C	1.075	0.8188	0.965	0.9391	1.17	0.7133
VWA8	13	13:42151045	42151045	A	0.9882	0.951	1.14	0.6676	0.8531	0.5376
VWA8	13	13:42155103	42155103	A	1.056	0.7466	0.9113	0.7348	1.114	0.6156
VWA8	13	13:42155821	42155821	A	1.15	0.2908	0.8735	0.5162	1.366	0.07145
VWA8	13	13:42156006	42156006	A	0.9814	0.9355	0.8119	0.56	1.118	0.7223
VWA8	13	13:42157799	42157799	A	0.8966	0.5348	1.285	0.3645	0.6738	0.1121
VWA8	13	13:42158778	42158778	T	0.8971	0.8123	0.7216	0.6329	0.8398	0.7811
VWA8	13	13:42160976	42160976	T	1.449	0.2634	1.321	0.5799	1.4	0.4431
VWA8	13	13:42163630	42163630	A	1.349	0.3524	1.283	0.6042	1.348	0.4941
VWA8	13	13:42163739	42163739	C	0.9029	0.4642	0.6512	0.05844	1.091	0.6292
VWA8	13	13:42166880	42166880	G	1.027	0.8256	0.8936	0.5646	1.104	0.54
VWA8	13	13:42171606	42171606	C	0.752	0.4527	0.4828	0.2961	0.9179	0.8463
VWA8	13	13:42173787	42173787	A	1.056	0.6615	0.9169	0.661	1.136	0.4353
VWA8	13	13:42175055	42175055	A	0.6251	0.1314	0.9088	0.8549	0.4888	0.08748
VWA8	13	13:42177454	42177454	C	1.083	0.4902	0.9044	0.5798	1.201	0.2287
VWA8	13	13:42183672	42183672	T	0.7976	0.3602	0.8157	0.6047	0.7628	0.3963
VWA8	13	13:42184792	42184792	C	0.9966	0.9785	1.149	0.5033	0.9594	0.7945
VWA8	13	13:42186864	42186864	A	1.186	0.4176	0.9138	0.7952	1.358	0.2432
VWA8	13	13:42187395	42187395	C	1.14	0.7689	1.388	0.6035	1.106	0.8757
VWA8	13	13:42194950	42194950	A	0.747	0.3451	0.491	0.1146	0.9534	0.911
VWA8	13	13:42195482	42195482	G	0.8991	0.7992	0.8343	0.767	1.17	0.7903
VWA8	13	13:42203243	42203243	C	0.8457	0.4662	0.6833	0.2565	1.045	0.8922
VWA8	13	13:42205505	42205505	A	0.9809	0.8773	1.057	0.783	0.9588	0.7949
VWA8	13	13:42212958	42212958	G	0.5879	0.2259	0.5916	0.4039	0.5363	0.339
VWA8	13	13:42230476	42230476	A	0.29	0.01619	0.4371	0.2612	0.1169	0.04034
VWA8	13	13:42231605	42231605	A	1.611	0.2649	0.9414	0.9265	2.153	0.1615
VWA8	13	13:42246277	42246277	A	0.951	0.7656	1.136	0.6293	0.8404	0.4453
VWA8	13	13:42252210	42252210	G	1.089	0.512	0.8061	0.2936	1.376	0.06341
VWA8	13	13:42259195	42259195	G	1.458	0.3432	1.118	0.8585	1.626	0.3411
VWA8	13	13:42264380	42264380	T	1.059	0.8731	1.213	0.7373	0.8416	0.7216
VWA8	13	13:42266925	42266925	G	1.434	0.3331	0.7164	0.61	1.862	0.1549
VWA8	13	13:42267744	42267744	T	1.219	0.6721	1.305	0.7238	1.116	0.8632
VWA8	13	13:42270305	42270305	C	0.8599	0.2539	0.5734	0.01175	1.088	0.6162
VWA8	13	13:42272742	42272742	C	0.9805	0.9247	0.7887	0.4588	1.135	0.6387
VWA8	13	13:42272932	42272932	C	0.9912	0.9513	0.962	0.8744	0.9833	0.9264
VWA8	13	13:42274240	42274240	A	1.149	0.2118	0.9413	0.7355	1.302	0.06727
VWA8	13	13:42275473	42275473	A	0.7076	0.4822	0.2455	0.05271	1.328	0.6564
VWA8	13	13:42278599	42278599	C	1.088	0.5676	1.114	0.6539	1.092	0.639
VWA8	13	13:42281307	42281307	C	1.252	0.5549	2.446	0.1656	0.7306	0.575
VWA8	13	13:42290435	42290435	G	1.497	0.1821	1.128	0.799	1.737	0.1585
VWA8	13	13:42290510	42290510	C	0.8113	0.383	0.9075	0.7756	0.8155	0.5588
VWA8	13	13:42298874	42298874	A	1.056	0.7059	1.008	0.9727	1.091	0.6342
VWA8	13	13:42300025	42300025	G	0.9828	0.8861	0.9935	0.9741	0.9842	0.9183
VWA8	13	13:42301272	42301272	C	0.8548	0.605	0.5463	0.2211	1.111	0.7773
VWA8	13	13:42306623	42306623	A	0.6691	0.05217	0.9189	0.8043	0.5194	0.0206
VWA8	13	13:42310633	42310633	G	1.154	0.2101	1.264	0.2091	1.084	0.5856
VWA8	13	13:42314903	42314903	G	0.8442	0.1232	0.8105	0.2447	0.8541	0.2641
VWA8	13	13:42318774	42318774	A	1.117	0.3679	0.9551	0.8195	1.249	0.1553
VWA8	13	13:42329761	42329761	T	1.064	0.679	1.101	0.7031	1.062	0.7545
VWA8	13	13:42331650	42331650	A	1.767	0.08027	1.792	0.224	1.721	0.2253
VWA8	13	13:42337621	42337621	C	1.109	0.3769	1.097	0.6327	1.11	0.481
VWA8	13	13:42344590	42344590	G	0.8292	0.5886	0.5447	0.2934	0.9945	0.9894
VWA8	13	13:42352415	42352415	A	0.8802	0.717	0.5447	0.2934	1.066	0.8801
VWA8	13	13:42356396	42356396	C	0.8619	0.6717	3.233	0.1402	0.3585	0.05284
VWA8	13	13:42359805	42359805	T	0.6716	0.2318	0.412	0.1091	0.8293	0.6593
VWA8	13	13:42363295	42363295	G	0.9656	0.7639	0.8098	0.2804	1.057	0.7083
VWA8	13	13:42371161	42371161	A	1.464	0.2982	0.6686	0.5463	1.931	0.1195
VWA8	13	13:42375364	42375364	A	0.963	0.7627	0.8279	0.3485	1.054	0.7433
VWA8	13	13:42385446	42385446	C	1.303	0.05413	1.241	0.3264	1.426	0.04805
VWA8	13	13:42388042	42388042	C	1.153	0.4855	1.009	0.9791	1.295	0.3166
VWA8	13	13:42399445	42399445	T	1.231	0.06451	1.176	0.3616	1.268	0.1054
VWA8	13	13:42404710	42404710	T	0.9287	0.7427	0.7498	0.4331	1.082	0.7854
VWA8	13	13:42415996	42415996	A	0.7564	0.01437	0.8635	0.4266	0.6982	0.01558
VWA8	13	13:42419946	42419946	G	1.441	0.3587	1.951	0.2647	1.069	0.9106
VWA8	13	13:42429357	42429357	A	1.122	0.8059	0.338	0.1552	2.199	0.1716
VWA8	13	13:42432179	42432179	T	0.7549	0.4093	0.4537	0.1466	0.9917	0.9841
VWA8	13	13:42438288	42438288	G	1.083	0.6456	1.39	0.2384	0.9036	0.6546
VWA8	13	13:42442546	42442546	G	1.083	0.6456	1.39	0.2384	0.9036	0.6546
VWA8	13	13:42448725	42448725	T	2.328	0.006015	2.118	0.1106	2.38	0.03207
VWA8	13	13:42451414	42451414	G	1.456	0.001296	1.278	0.1945	1.659	0.00085
VWA8	13	13:42461622	42461622	T	1.258	0.117	1.139	0.5906	1.371	0.08795
VWA8	13	13:42465092	42465092	C	1.052	0.9116	1.391	0.6394	0.7858	0.6973
VWA8	13	13:42465713	42465713	T	1.178	0.3998	1.61	0.1215	0.937	0.8015
VWA8	13	13:42466116	42466116	A	0.8848	0.7297	3.233	0.1402	0.373	0.06459
VWA8	13	13:42487165	42487165	T	0.4803	0.08438	0.5339	0.2515	0.3211	0.1446
VWA8	13	13:42505507	42505507	C	0.8062	0.1674	0.7568	0.2764	0.8322	0.3585
VWA8	13	13:42526892	42526892	T	1.756	0.0005118	2.19	0.004344	1.534	0.03702
VWA8	13	13:42536740	42536740	C	1.441	0.3587	1.951	0.2647	1.069	0.9106
RNF187	1	1:228686159	228686159	A	2.465	0.05489	2.154	0.2858	2.959	0.08351
RNF187	1	1:228700450	228700450	C	0.8921	0.4006	0.8892	0.5992	0.9212	0.6349
RNF187	1	1:228700913	228700913	A	1.462	0.07665	1.156	0.6872	1.628	0.06767
RNF187	1	1:228702274	228702274	G	1.297	0.02497	1.139	0.4837	1.409	0.02361
RNF187	1	1:228703236	228703236	C	1.196	0.3572	0.9799	0.9482	1.296	0.2872
RNF187	1	1:228703289	228703289	A	0.6899	0.01885	0.8046	0.4104	0.6564	0.03766
RNF187	1	1:228705336	228705336	G	1.024	0.914	1.254	0.5506	0.9459	0.8412
RNF187	1	1:228705421	228705421	G	1.565	0.2096	1.543	0.4905	1.642	0.2511
RNF187	1	1:228707539	228707539	T	1.201	0.1831	1.33	0.1918	1.11	0.5636
CYP2C8	10	10:96809051	96809051	C	0.516	0.1446	0.5733	0.4107	0.4291	0.2044
CYP2C8	10	10:96813943	96813943	T	1.242	0.2156	1.394	0.2315	1.169	0.5013
CYP2C8	10	10:96818119	96818119	C	0.6851	0.4615	0.6415	0.5704	0.6867	0.5945
CYP2C8	10	10:96818362	96818362	C	1.071	0.6357	1.521	0.0948	0.8644	0.4337
CYP2C8	10	10:96824883	96824883	C	0.9792	0.8513	1.051	0.7792	0.9172	0.5575
CYP2C8	10	10:96826966	96826966	T	1.546	0.09336	1.807	0.1851	1.476	0.2398
CYP2C8	10	10:96827030	96827030	T	0.6654	0.2353	0.6504	0.3089	0.7983	0.716
CYP2C8	10	10:96827150	96827150	A	1.075	0.6768	0.8325	0.5713	1.161	0.4662
CYP2C8	10	10:96827178	96827178	T	0.9303	0.6198	0.8919	0.6116	0.952	0.7984
CYP2C8	10	10:96828160	96828160	T	0.9926	0.9561	1.073	0.7411	0.9354	0.705
CYP2C8	10	10:96828323	96828323	C	1.053	0.682	0.8889	0.58	1.145	0.3878
CYP2C8	10	10:96829430	96829430	T	0.8351	0.4139	0.7528	0.4406	0.9045	0.717
CYP2C8	10	10:96831389	96831389	C	0.9583	0.7771	1.039	0.8724	0.9136	0.6466
PCDH15	10	10:55573294	55573294	G	0.4001	0.006517	0.4921	0.09754	0.1912	0.02886
PCDH15	10	10:55573997	55573997	C	1.035	0.9196	0.7406	0.5965	1.411	0.4137
PCDH15	10	10:55576265	55576265	C	1.029	0.835	1.343	0.1796	0.8493	0.3845
PCDH15	10	10:55577022	55577022	A	0.7089	0.03352	0.6012	0.04474	0.7787	0.2343
PCDH15	10	10:55579294	55579294	C	0.7448	0.009829	0.8718	0.4539	0.6653	0.006218
PCDH15	10	10:55581779	55581779	C	1.134	0.572	0.6065	0.1904	1.614	0.07814
PCDH15	10	10:55583475	55583475	G	1.093	0.6681	0.7263	0.397	1.36	0.2142
PCDH15	10	10:55590238	55590238	A	0.8625	0.5734	0.8006	0.5658	0.823	0.5997
PCDH15	10	10:55590950	55590950	T	0.9981	0.9863	0.973	0.8803	1.027	0.8549
PCDH15	10	10:55609769	55609769	G	1.102	0.4193	1.454	0.06371	0.9847	0.9203
PCDH15	10	10:55623309	55623309	C	0.9572	0.7013	0.8352	0.3527	1.033	0.8199
PCDH15	10	10:55625512	55625512	G	0.9759	0.9005	1.112	0.7398	0.9463	0.8255
PCDH15	10	10:55628231	55628231	C	0.7829	0.4948	0.4427	0.1495	1.181	0.7225
PCDH15	10	10:55634290	55634290	A	1.031	0.8339	0.9295	0.7679	1.075	0.6841
PCDH15	10	10:55634794	55634794	G	1.228	0.06162	1.19	0.326	0.7887	0.09528
PCDH15	10	10:55638014	55638014	C	1.203	0.1393	1.2	0.3775	1.21	0.236
PCDH15	10	10:55645842	55645842	T	0.9889	0.9315	0.9891	0.9584	0.9842	0.9245
PCDH15	10	10:55646100	55646100	G	1.225	0.5352	1.055	0.9329	1.385	0.3906
PCDH15	10	10:55657419	55657419	T	1.12	0.3027	0.9759	0.8959	1.23	0.1349
PCDH15	10	10:55658253	55658253	C	1.125	0.2853	0.9863	0.9404	1.23	0.1349
PCDH15	10	10:55658266	55658266	C	1.082	0.4658	0.961	0.8279	1.174	0.2386
PCDH15	10	10:55660920	55660920	T	0.7596	0.4984	0.4992	0.2763	1.045	0.9316
PCDH15	10	10:55661985	55661985	A	0.8762	0.2503	0.8819	0.4952	0.8773	0.384
PCDH15	10	10:55662156	55662156	T	0.9722	0.8053	0.9718	0.875	0.9461	0.7107
PCDH15	10	10:55668437	55668437	C	1.265	0.5916	0.4801	0.3782	1.893	0.2109
PCDH15	10	10:55669198	55669198	C	1.102	0.4614	1.177	0.4616	1.073	0.6694
PCDH15	10	10:55680360	55680360	A	1.014	0.942	0.8295	0.5063	1.126	0.6484
PCDH15	10	10:55680361	55680361	G	1.104	0.4839	0.9269	0.7531	1.252	0.199
PCDH15	10	10:55681104	55681104	C	1.019	0.9726	1.033	0.9687	0.9781	0.9757
PCDH15	10	10:55681662	55681662	G	0.8902	0.4328	1.015	0.9518	0.8233	0.3157
PCDH15	10	10:55691363	55691363	T	0.9191	0.5639	1.042	0.864	0.8668	0.4485
PCDH15	10	10:55695655	55695655	C	0.862	0.2095	0.9687	0.8654	0.8081	0.1723
PCDH15	10	10:55701120	55701120	C	1.699	0.02369	1.281	0.4981	1.982	0.02433
PCDH15	10	10:55701225	55701225	T	1.163	0.3869	1.198	0.5357	1.155	0.5114
PCDH15	10	10:55704488	55704488	T	1.139	0.2499	1.088	0.6537	1.186	0.2398
PCDH15	10	10:55719027	55719027	T	0.9689	0.8933	1.374	0.4243	0.7855	0.444
PCDH15	10	10:55720024	55720024	G	1.187	0.1807	1.015	0.9478	1.293	0.1039
PCDH15	10	10:55725636	55725636	T	1.158	0.221	1.153	0.4687	1.172	0.3029
PCDH15	10	10:55725756	55725756	G	1.183	0.1725	1.17	0.4343	1.205	0.2367
PCDH15	10	10:55725788	55725788	T	1.139	0.2835	1.17	0.4267	1.132	0.4267
PCDH15	10	10:55735463	55735463	C	1.025	0.8248	1.138	0.4826	0.9602	0.7736
PCDH15	10	10:55740114	55740114	T	1.056	0.7659	1.135	0.6569	1.005	0.9825
PCDH15	10	10:55743630	55743630	C	0.7145	0.07617	1.088	0.7867	0.4755	0.005667
PCDH15	10	10:55745211	55745211	T	0.8909	0.3033	0.8759	0.4688	0.9227	0.5765
PCDH15	10	10:55746740	55746740	C	0.928	0.6037	0.8907	0.6242	0.9431	0.7506
PCDH15	10	10:55750018	55750018	T	1.252	0.5227	1.106	0.845	1.442	0.4512
PCDH15	10	10:55755340	55755340	T	1.456	0.2133	1.545	0.3291	1.444	0.3833
PCDH15	10	10:55755491	55755491	T	1.107	0.4525	0.8078	0.3405	1.411	0.04537
PCDH15	10	10:55757502	55757502	C	1.109	0.4461	0.7844	0.2808	1.438	0.035
PCDH15	10	10:55766428	55766428	T	1.039	0.7333	0.8992	0.5518	1.214	0.1899
PCDH15	10	10:55767067	55767067	C	1.298	0.3294	1.355	0.4454	1.265	0.5279
PCDH15	10	10:55768150	55768150	A	1.129	0.3287	1.291	0.2154	1.005	0.9758
PCDH15	10	10:55774649	55774649	C	1.059	0.6312	0.9539	0.8075	1.144	0.3854
PCDH15	10	10:55780530	55780530	A	0.9683	0.7845	1.114	0.5636	0.8641	0.347
PCDH15	10	10:55782743	55782743	G	1.126	0.6203	1.648	0.2723	0.9258	0.7948
PCDH15	10	10:55791006	55791006	G	1.369	0.2319	1.828	0.2225	1.193	0.5825
PCDH15	10	10:55791572	55791572	A	0.8831	0.3754	1.004	0.9835	0.802	0.245
PCDH15	10	10:55798725	55798725	C	0.9482	0.6789	1.1	0.6454	0.8851	0.4677
PCDH15	10	10:55801833	55801833	G	1.275	0.1774	1.38	0.2845	1.132	0.5908
PCDH15	10	10:55804447	55804447	G	0.9134	0.4482	1.054	0.7836	0.8345	0.2451
PCDH15	10	10:55806316	55806316	G	0.8785	0.2734	0.7862	0.2044	0.9806	0.8985
PCDH15	10	10:55819700	55819700	T	1.159	0.2108	0.9168	0.6523	1.33	0.05901
PCDH15	10	10:55822020	55822020	A	1.094	0.4537	1.125	0.5381	1.062	0.6988
PCDH15	10	10:55828241	55828241	C	0.847	0.2474	0.7561	0.242	0.8909	0.5252
PCDH15	10	10:55830648	55830648	G	1.048	0.686	1.098	0.6207	0.9878	0.9344
PCDH15	10	10:55831676	55831676	G	1.073	0.7421	0.7647	0.4156	1.381	0.2411
PCDH15	10	10:55832098	55832098	G	1.921	0.1301	1.476	0.6486	2.108	0.1313
PCDH15	10	10:55832248	55832248	G	1.029	0.8348	1.29	0.2361	0.9184	0.6347
PCDH15	10	10:55832495	55832495	A	0.9775	0.9473	0.7345	0.5801	1.226	0.6407
PCDH15	10	10:55838527	55838527	A	0.7879	0.08047	0.6754	0.08787	0.8798	0.4547
PCDH15	10	10:55838862	55838862	A	0.5368	0.1329	0.4736	0.2445	0.6148	0.3633
PCDH15	10	10:55840134	55840134	G	0.9982	0.9932	1.147	0.6823	0.8282	0.5191
PCDH15	10	10:55842152	55842152	A	1.106	0.428	0.8511	0.4227	1.344	0.07871
PCDH15	10	10:55844473	55844473	T	0.9377	0.6769	1.357	0.2495	0.7426	0.1371
PCDH15	10	10:55847491	55847491	G	1.208	0.3271	0.9424	0.8533	1.382	0.1753
PCDH15	10	10:55847948	55847948	T	1.062	0.6515	1.199	0.392	1.005	0.9784
PCDH15	10	10:55848054	55848054	T	0.9811	0.8958	0.9355	0.7761	1.01	0.9554
PCDH15	10	10:55849575	55849575	C	1.35	0.1062	1.218	0.5248	1.431	0.1223
PCDH15	10	10:55855541	55855541	C	1.491	0.2463	2.25	0.2358	1.32	0.493
PCDH15	10	10:55856732	55856732	T	0.9777	0.8867	0.9527	0.8473	1.003	0.9885
PCDH15	10	10:55856912	55856912	G	1.572	0.01416	2.079	0.03483	1.316	0.2237
PCDH15	10	10:55857900	55857900	G	0.8935	0.6206	0.7215	0.3512	1.093	0.7696
PCDH15	10	10:55858508	55858508	C	0.9891	0.9452	1.079	0.7746	0.9539	0.8178
PCDH15	10	10:55859752	55859752	G	1.024	0.8392	0.9528	0.7888	1.086	0.5901
PCDH15	10	10:55867735	55867735	A	1.04	0.7309	1.012	0.9493	1.043	0.7774
PCDH15	10	10:55868403	55868403	A	0.4777	0.04941	0.3565	0.06825	0.6687	0.4111
PCDH15	10	10:55870356	55870356	T	0.8976	0.4035	0.8892	0.5846	0.878	0.4315
PCDH15	10	10:55871271	55871271	C	1.128	0.5399	0.9924	0.9795	1.309	0.3065
PCDH15	10	10:55872562	55872562	G	0.8688	0.6934	1.039	0.9551	0.7791	0.5702
PCDH15	10	10:55874632	55874632	T	1.341	0.1253	1.242	0.4962	1.41	0.1513
PCDH15	10	10:55880531	55880531	C	1.392	0.005819	1.455	0.06051	1.371	0.03883
PCDH15	10	10:55881720	55881720	T	1.218	0.3877	0.7646	0.4479	1.695	0.07853
PCDH15	10	10:55882342	55882342	C	1.137	0.5853	0.7205	0.3726	1.571	0.1442
PCDH15	10	10:55884408	55884408	C	1.308	0.01936	1.116	0.5548	1.456	0.012
PCDH15	10	10:55885056	55885056	G	0.7534	0.524	1.219	0.8215	0.5152	0.2618
PCDH15	10	10:55885524	55885524	A	0.7873	0.1233	1.049	0.8382	0.6365	0.04037
PCDH15	10	10:55890367	55890367	G	0.8943	0.4483	1.233	0.3472	0.6933	0.08233
PCDH15	10	10:55892389	55892389	G	0.8564	0.2029	0.9686	0.8715	0.778	0.1096
PCDH15	10	10:55892402	55892402	T	1.105	0.3845	0.8984	0.5595	1.301	0.07744
PCDH15	10	10:55892642	55892642	C	1.11	0.725	0.7921	0.6448	1.229	0.574
PCDH15	10	10:55896158	55896158	T	1.304	0.6162	0.9949	0.9959	1.351	0.6343
PCDH15	10	10:55904720	55904720	T	0.6034	0.1027	0.2427	0.004076	1.151	0.7301
PCDH15	10	10:55905247	55905247	A	3.069	0.04563	2.66	0.3827	3.27	0.06375
PCDH15	10	10:55910958	55910958	G	1.466	0.4959	0.7841	0.8151	1.743	0.3992
PCDH15	10	10:55913771	55913771	A	1.242	0.1709	1.527	0.1372	1.113	0.5839
PCDH15	10	10:55915376	55915376	A	0.8956	0.7977	3.764	0.1185	0.3628	0.1221
PCDH15	10	10:55921305	55921305	A	0.7874	0.09467	0.8231	0.3849	0.7385	0.1107
PCDH15	10	10:55922376	55922376	T	1.039	0.9012	1.112	0.8165	0.9872	0.9752
PCDH15	10	10:55922706	55922706	G	1.248	0.06239	1.29	0.1749	1.257	0.1428
PCDH15	10	10:55925040	55925040	T	1.338	0.01229	1.304	0.1533	1.379	0.03345
PCDH15	10	10:55932503	55932503	C	0.9898	0.9723	0.6446	0.3725	1.122	0.756
PCDH15	10	10:55933787	55933787	T	0.7544	0.4518	0.4805	0.2773	0.9187	0.8473
PCDH15	10	10:55935418	55935418	G	1.893	0.03251	3.008	0.04102	1.593	0.2183
PCDH15	10	10:55939651	55939651	G	0.2784	0.03341	0.2575	0.08751	0.2041	0.1472
PCDH15	10	10:55939765	55939765	A	0.9937	0.9765	0.8306	0.5882	1.119	0.6844
PCDH15	10	10:55940858	55940858	G	0.7516	0.3007	1.582	0.302	0.3959	0.03333
PCDH15	10	10:55944422	55944422	A	0.9668	0.9036	0.6403	0.3334	1.141	0.7067
PCDH15	10	10:55944974	55944974	T	0.8848	0.629	1.266	0.5742	0.6652	0.2343
PCDH15	10	10:55947008	55947008	C	0.7265	0.4239	0.4922	0.2627	1.226	0.6959
PCDH15	10	10:55953028	55953028	G	1.078	0.4968	1.041	0.8194	1.164	0.298
PCDH15	10	10:55954083	55954083	T	1.278	0.1881	2.068	0.02488	0.9734	0.9126
PCDH15	10	10:55955444	55955444	G	0.8075	0.123	0.8519	0.4573	0.7453	0.1147
PCDH15	10	10:55955610	55955610	T	0.9834	0.8999	1.01	0.9627	0.9842	0.9267
PCDH15	10	10:55957100	55957100	C	0.9268	0.7866	0.7879	0.6334	0.9977	0.9946
PCDH15	10	10:55961210	55961210	T	0.8987	0.6644	1.135	0.7817	0.8421	0.5647
PCDH15	10	10:55961936	55961936	T	1.554	0.2764	3.8	0.1724	1.279	0.5875
PCDH15	10	10:55962637	55962637	A	0.8047	0.3869	1.068	0.8858	0.746	0.3416
PCDH15	10	10:55964126	55964126	G	0.889	0.6302	1.124	0.7937	0.8315	0.5371
PCDH15	10	10:55964742	55964742	C	0.941	0.5862	1.072	0.6953	0.8379	0.2301
PCDH15	10	10:55965692	55965692	T	2.557	0.004514	5.651	0.008543	1.829	0.1413
PCDH15	10	10:55970177	55970177	G	1.015	0.9004	0.8712	0.46	1.182	0.3001
PCDH15	10	10:55972031	55972031	C	1.035	0.7865	0.8318	0.3425	1.266	0.1686
PCDH15	10	10:55975144	55975144	A	1.467	0.3848	0.6292	0.4545	2.877	0.0828
PCDH15	10	10:55978740	55978740	A	2.501	0.05395	1.97	0.4297	2.586	0.1007
PCDH15	10	10:55984469	55984469	C	0.8829	0.3217	0.9629	0.8522	0.8384	0.2801
PCDH15	10	10:55991753	55991753	G	0.9968	0.9835	1.003	0.9904	1.013	0.9499
PCDH15	10	10:55993890	55993890	G	1.125	0.6141	1.109	0.7952	1.111	0.7198
PCDH15	10	10:55996608	55996608	C	0.8706	0.5356	1.205	0.6052	0.6871	0.2153
PCDH15	10	10:55999192	55999192	G	1.085	0.4842	1.1	0.6202	1.036	0.813
PCDH15	10	10:56001078	56001078	A	0.9673	0.7825	0.8701	0.4505	1.066	0.6895
PCDH15	10	10:56003263	56003263	T	1.416	0.0815	1.375	0.3604	1.415	0.1616
PCDH15	10	10:56004457	56004457	T	1.335	0.1846	1.516	0.2758	1.228	0.4494
PCDH15	10	10:56007344	56007344	C	1.325	0.1259	1.959	0.03811	1.065	0.7891
PCDH15	10	10:56007725	56007725	A	1.542	0.06955	1.478	0.3502	1.561	0.1333
PCDH15	10	10:56011733	56011733	G	1.911	0.0314	6.615	0.003922	1.118	0.7716
PCDH15	10	10:56015656	56015656	A	1.161	0.2689	1.532	0.06191	0.9708	0.8647
PCDH15	10	10:56017041	56017041	A	1.106	0.6976	1.317	0.5477	1.036	0.9129
PCDH15	10	10:56018508	56018508	G	0.9474	0.6414	0.9558	0.8118	0.9333	0.6443
PCDH15	10	10:56020163	56020163	T	0.93	0.5367	0.9209	0.6663	0.9358	0.6618
PCDH15	10	10:56022809	56022809	A	0.856	0.3446	0.8568	0.5341	0.8444	0.4503
PCDH15	10	10:56024631	56024631	G	0.9443	0.6275	0.8002	0.2363	1.051	0.75
PCDH15	10	10:56025604	56025604	A	0.9306	0.558	0.8142	0.2868	1.016	0.9205
PCDH15	10	10:56038831	56038831	G	0.9703	0.7922	0.7292	0.08946	0.7516	0.05528
PCDH15	10	10:56039219	56039219	A	1.121	0.3105	1.032	0.8589	1.208	0.196
PCDH15	10	10:56062317	56062317	A	0.9241	0.5975	0.5675	0.014	1.391	0.09761
PCDH15	10	10:56071606	56071606	G	1.138	0.2489	0.7768	0.1649	1.479	0.007822
PCDH15	10	10:56072949	56072949	T	0.9749	0.8493	1.239	0.3505	0.8614	0.3786
PCDH15	10	10:56073899	56073899	G	1.104	0.8218	1.88	0.4017	0.7551	0.6518
PCDH15	10	10:56075692	56075692	G	0.9163	0.4771	1.238	0.2817	0.7173	0.04404
PCDH15	10	10:56075745	56075745	G	1.367	0.07619	1.214	0.5138	1.516	0.06488
PCDH15	10	10:56075990	56075990	C	0.8709	0.2846	1.207	0.3621	0.6761	0.02452
PCDH15	10	10:56076004	56076004	C	0.7952	0.1585	0.7318	0.2029	0.8299	0.4027
PCDH15	10	10:56076296	56076296	G	0.8067	0.1094	1.199	0.3907	0.5858	0.003784
PCDH15	10	10:56079721	56079721	T	1.038	0.7526	1.305	0.1618	0.8799	0.4158
PCDH15	10	10:56083891	56083891	G	1.49	0.04054	1.428	0.3086	1.577	0.05693
PCDH15	10	10:56087113	56087113	T	0.9857	0.9054	1.218	0.3442	0.8781	0.3999
PCDH15	10	10:56087484	56087484	C	0.9968	0.979	1.204	0.3716	0.8994	0.4928
PCDH15	10	10:56087659	56087659	A	0.8873	0.3414	1.14	0.5106	0.7325	0.06378
PCDH15	10	10:56088627	56088627	A	1.18	0.1708	1.585	0.02882	1.003	0.9839
PCDH15	10	10:56094440	56094440	G	1.128	0.288	0.7692	0.1506	1.459	0.01124
PCDH15	10	10:56098424	56098424	A	1.628	0.03544	1.278	0.4834	1.981	0.02342
PCDH15	10	10:56104514	56104514	A	1.196	0.1106	1.461	0.03419	1.029	0.8458
PCDH15	10	10:56104726	56104726	T	1.196	0.1111	1.458	0.03483	1.03	0.8404
PCDH15	10	10:56107138	56107138	C	1.251	0.1042	1.695	0.03002	1.02	0.911
PCDH15	10	10:56109724	56109724	T	1.044	0.8119	1.495	0.1832	0.8	0.3449
PCDH15	10	10:56112161	56112161	T	2.035	0.03446	1.833	0.2852	2.174	0.05786
PCDH15	10	10:56114857	56114857	A	0.797	0.1451	0.8894	0.6365	0.75	0.161
PCDH15	10	10:56119089	56119089	G	0.7197	0.3532	0.2866	0.02792	1.53	0.3598
PCDH15	10	10:56120566	56120566	A	1.329	0.02445	1.559	0.04045	1.174	0.315
PCDH15	10	10:56124257	56124257	G	1.38	0.3182	0.6479	0.5036	1.857	0.09372
PCDH15	10	10:56126202	56126202	C	1.055	0.7098	1.804	0.018	0.7896	0.2137
PCDH15	10	10:56132046	56132046	G	0.813	0.1647	0.3896	9.525e-05	1.43	0.0698
PCDH15	10	10:56149725	56149725	T	0.8416	0.1865	0.8831	0.5396	0.8033	0.2091
PCDH15	10	10:56151359	56151359	A	0.8422	0.3077	0.3614	0.0001756	1.524	0.0551
PCDH15	10	10:56153822	56153822	C	0.6254	0.1478	0.2937	0.04018	0.8859	0.7566
PCDH15	10	10:56153917	56153917	C	0.916	0.5391	1.008	0.9735	0.8792	0.4875
PCDH15	10	10:56156116	56156116	A	1.073	0.6514	1.205	0.4537	0.9641	0.8579
PCDH15	10	10:56162224	56162224	A	1.862	0.02501	2.224	0.1307	1.711	0.1045
PCDH15	10	10:56166441	56166441	C	1.786	0.0008624	1.964	0.03559	1.678	0.01321
PCDH15	10	10:56166892	56166892	C	0.8302	0.3725	0.4059	0.003863	1.526	0.1262
PCDH15	10	10:56171673	56171673	C	1.346	0.01306	1.168	0.4278	1.448	0.0155
PCDH15	10	10:56171910	56171910	A	1.932	0.1528	1.31	0.7537	2.148	0.1479
PCDH15	10	10:56173800	56173800	C	0.7978	0.06095	0.6309	0.02289	0.9104	0.5384
PCDH15	10	10:56174108	56174108	A	1.253	0.06558	1.076	0.7098	1.363	0.05117
PCDH15	10	10:56177015	56177015	C	0.9552	0.6986	1.337	0.1305	0.7661	0.09177
PCDH15	10	10:56177124	56177124	A	1.284	0.4223	1.094	0.8792	1.29	0.4918
PCDH15	10	10:56177988	56177988	G	0.7898	0.1467	0.7859	0.3127	0.776	0.2663
PCDH15	10	10:56178158	56178158	T	0.7878	0.3113	1.014	0.9735	0.646	0.1444
PCDH15	10	10:56181419	56181419	G	1.258	0.1118	0.8574	0.5047	1.617	0.009953
PCDH15	10	10:56181578	56181578	G	1.081	0.5143	0.9823	0.9243	1.173	0.3144
PCDH15	10	10:56188944	56188944	A	0.9212	0.5412	0.7543	0.1846	1.062	0.7314
PCDH15	10	10:56190305	56190305	A	0.9114	0.437	1.443	0.05968	0.6689	0.01277
PCDH15	10	10:56195964	56195964	C	1.177	0.327	1.421	0.2162	1.039	0.8551
PCDH15	10	10:56200276	56200276	C	0.9435	0.6063	0.8928	0.5348	0.97	0.8354
PCDH15	10	10:56202366	56202366	T	1.272	0.5862	1.936	0.3813	0.9727	0.9631
PCDH15	10	10:56204291	56204291	G	0.8609	0.2821	1.238	0.3436	0.6929	0.05031
PCDH15	10	10:56204792	56204792	C	1.069	0.6338	0.9319	0.7573	1.197	0.3174
PCDH15	10	10:56206199	56206199	C	0.9218	0.5703	0.8862	0.5932	0.9379	0.7354
PCDH15	10	10:56207381	56207381	G	0.8978	0.349	0.9736	0.8835	0.8513	0.2861
PCDH15	10	10:56208334	56208334	T	1.403	0.04797	1.329	0.2966	1.48	0.07551
PCDH15	10	10:56208673	56208673	C	1.094	0.7498	0.7703	0.5013	1.538	0.2838
PCDH15	10	10:56208736	56208736	A	0.8344	0.1326	0.788	0.2213	0.8625	0.343
PCDH15	10	10:56212257	56212257	A	0.9068	0.7851	0.6915	0.5504	1.082	0.8564
PCDH15	10	10:56212367	56212367	G	0.8872	0.2864	0.7085	0.05224	1.007	0.961
PCDH15	10	10:56217828	56217828	C	1.198	0.506	1.347	0.5427	1.106	0.7597
PCDH15	10	10:56218932	56218932	T	0.8881	0.3782	1.122	0.6108	0.7942	0.178
PCDH15	10	10:56219842	56219842	A	1.132	0.6379	1.09	0.8587	1.235	0.5022
PCDH15	10	10:56222061	56222061	C	0.9894	0.9319	1.004	0.9832	1.035	0.8249
PCDH15	10	10:56224597	56224597	T	0.847	0.1373	0.9694	0.8606	0.7702	0.07614
PCDH15	10	10:56225300	56225300	T	1.007	0.9539	0.9305	0.6959	1.066	0.667
PCDH15	10	10:56231096	56231096	T	0.9255	0.8378	0.7634	0.6077	1.213	0.7184
PCDH15	10	10:56231150	56231150	A	0.7063	0.05008	0.7949	0.3963	0.6205	0.0504
PCDH15	10	10:56239430	56239430	C	0.8221	0.3394	1.411	0.2597	0.5005	0.02626
PCDH15	10	10:56240623	56240623	T	0.7733	0.2786	0.9019	0.7929	0.6481	0.1731
PCDH15	10	10:56241020	56241020	A	0.9821	0.9659	0.607	0.4238	1.419	0.5337
PCDH15	10	10:56241190	56241190	C	1.076	0.5204	0.9581	0.8164	1.194	0.2321
PCDH15	10	10:56243526	56243526	G	0.9834	0.8808	1.301	0.1547	0.8475	0.2527
PCDH15	10	10:56248170	56248170	A	1.225	0.5945	1.187	0.7756	1.247	0.657
PCDH15	10	10:56249121	56249121	T	0.9383	0.7887	1.479	0.2631	0.6449	0.2083
PCDH15	10	10:56254930	56254930	T	1.029	0.8772	1.263	0.4172	0.898	0.6691
PCDH15	10	10:56255724	56255724	C	0.465	0.1498	0.3429	0.2607	0.5595	0.353
PCDH15	10	10:56260999	56260999	T	0.8909	0.6435	1.124	0.7682	0.6744	0.2588
PCDH15	10	10:56262280	56262280	G	0.8009	0.2398	0.6967	0.2053	0.9109	0.7103
PCDH15	10	10:56266582	56266582	G	1.015	0.9508	0.9168	0.8316	1.054	0.8638
PCDH15	10	10:56271258	56271258	C	1.039	0.8482	0.8176	0.5147	1.207	0.4651
PCDH15	10	10:56281111	56281111	C	0.6846	0.3872	0.4913	0.2575	1.045	0.9417
PCDH15	10	10:56282894	56282894	G	0.2889	0.01507	0.7255	0.6415	NA	NA
PCDH15	10	10:56286771	56286771	T	0.7788	0.4397	0.7089	0.5721	0.8606	0.6978
PCDH15	10	10:56289444	56289444	G	1.553	0.01389	2.062	0.04157	1.324	0.1858
PCDH15	10	10:56295820	56295820	A	1.157	0.2124	1.083	0.6848	1.128	0.418
PCDH15	10	10:56299701	56299701	T	0.8356	0.1179	0.8384	0.3355	0.8481	0.2716
PCDH15	10	10:56302543	56302543	A	1.243	0.1212	1.335	0.2196	1.14	0.4592
PCDH15	10	10:56303946	56303946	G	0.9486	0.8186	0.9699	0.9353	0.92	0.7799
PCDH15	10	10:56304066	56304066	A	0.988	0.9247	1.179	0.4536	0.9192	0.6009
PCDH15	10	10:56304265	56304265	G	0.9524	0.697	0.9055	0.613	1	0.9996
PCDH15	10	10:56305305	56305305	T	1.007	0.9696	1.131	0.6953	0.9085	0.6803
PCDH15	10	10:56305666	56305666	T	0.7693	0.4654	0.6538	0.5097	0.8808	0.7683
PCDH15	10	10:56313403	56313403	A	0.9569	0.7034	1.11	0.5849	0.9104	0.5254
PCDH15	10	10:56314548	56314548	G	1.231	0.6966	0.9806	0.9817	1.106	0.8808
PCDH15	10	10:56317742	56317742	G	0.8898	0.3909	0.8184	0.3472	0.9301	0.6853
PCDH15	10	10:56319640	56319640	A	0.9771	0.8537	1.029	0.8924	0.969	0.8405
PCDH15	10	10:56319852	56319852	C	1.121	0.3782	0.99	0.9608	1.192	0.3
PCDH15	10	10:56322441	56322441	G	1.102	0.7934	1.932	0.3532	0.728	0.5118
PCDH15	10	10:56322477	56322477	C	1.235	0.2998	1.605	0.1847	1.068	0.7972
PCDH15	10	10:56322743	56322743	A	1.133	0.7412	2.016	0.3206	0.7079	0.5008
PCDH15	10	10:56323457	56323457	G	0.9386	0.5752	0.7371	0.09218	1.109	0.4809
PCDH15	10	10:56324094	56324094	C	1.18	0.2441	1.244	0.3293	1.127	0.527
PCDH15	10	10:56325976	56325976	A	0.8294	0.3317	0.8879	0.7063	0.7861	0.3358
PCDH15	10	10:56327876	56327876	G	0.9905	0.9574	1.229	0.4712	0.8382	0.4693
PCDH15	10	10:56336857	56336857	A	0.9167	0.7437	1.043	0.9183	0.7341	0.4246
PCDH15	10	10:56337612	56337612	G	0.937	0.6328	1.076	0.7361	0.856	0.3906
PCDH15	10	10:56337653	56337653	T	0.9509	0.8305	0.8537	0.6569	1.129	0.7001
PCDH15	10	10:56338034	56338034	C	1.003	0.995	2.496	0.2816	0.5603	0.3423
PCDH15	10	10:56339671	56339671	A	0.9953	0.9823	1.381	0.3626	0.8268	0.4923
PCDH15	10	10:56343345	56343345	G	0.951	0.767	1.192	0.5317	0.8197	0.3752
PCDH15	10	10:56345242	56345242	A	1.325	0.1389	1.243	0.4683	1.357	0.2164
PCDH15	10	10:56349666	56349666	G	0.928	0.5708	1.115	0.6133	0.815	0.2374
PCDH15	10	10:56362285	56362285	A	0.9816	0.9387	0.8225	0.6128	1.192	0.5736
PCDH15	10	10:56362706	56362706	C	0.966	0.9309	3.068	0.1729	0.4389	0.169
PCDH15	10	10:56363051	56363051	C	1.1	0.6789	1.207	0.6229	1.109	0.7223
PCDH15	10	10:56366138	56366138	C	1.149	0.5495	1.302	0.4993	1.142	0.6491
PCDH15	10	10:56366171	56366171	A	0.9782	0.9149	1.091	0.7852	0.8813	0.6498
PCDH15	10	10:56366524	56366524	C	0.8095	0.07165	0.7943	0.2191	0.8148	0.181
PCDH15	10	10:56372381	56372381	T	1.016	0.9522	0.6713	0.3368	1.434	0.2736
PCDH15	10	10:56376155	56376155	C	1.212	0.1487	1.7	0.02216	1.011	0.9461
PCDH15	10	10:56376360	56376360	T	0.9192	0.6095	0.9778	0.935	0.8645	0.4954
PCDH15	10	10:56376556	56376556	A	0.9888	0.9538	0.8379	0.5814	1.022	0.931
PCDH15	10	10:56379269	56379269	C	0.9886	0.9442	1.145	0.6133	0.8935	0.6008
PCDH15	10	10:56380493	56380493	C	0.8848	0.3752	0.8069	0.323	0.9726	0.8783
PCDH15	10	10:56384099	56384099	G	0.8969	0.6121	1.16	0.7227	0.8103	0.4135
PCDH15	10	10:56386858	56386858	T	0.9351	0.5701	1.024	0.904	0.8988	0.4812
PCDH15	10	10:56389870	56389870	T	0.9872	0.9155	0.8931	0.5708	1.064	0.6861
PCDH15	10	10:56391303	56391303	T	0.9522	0.7447	1.116	0.6622	0.8709	0.4729
PCDH15	10	10:56395806	56395806	G	1.076	0.7391	0.9218	0.8205	1.143	0.6349
PCDH15	10	10:56398793	56398793	G	0.8321	0.5822	1.213	0.6973	0.6454	0.3621
PCDH15	10	10:56401166	56401166	T	0.9087	0.443	0.8144	0.3197	0.9872	0.9353
PCDH15	10	10:56401680	56401680	T	1.369	0.4884	1.873	0.4896	1.144	0.8114
PCDH15	10	10:56410878	56410878	G	0.5005	0.1037	0.3507	0.1033	0.7102	0.536
PCDH15	10	10:56411659	56411659	C	0.7653	0.1203	0.7433	0.2733	0.7557	0.2198
PCDH15	10	10:56412424	56412424	A	0.9924	0.9667	0.8923	0.6857	1.039	0.8762
PCDH15	10	10:56414627	56414627	C	1.429	0.4643	0.6264	0.5764	1.933	0.2611
PCDH15	10	10:56422164	56422164	A	0.9964	0.977	0.8895	0.5588	1.054	0.7505
PCDH15	10	10:56423968	56423968	C	1.04	0.8321	1.095	0.7573	1.066	0.7912
PCDH15	10	10:56428277	56428277	C	0.8792	0.2402	0.9159	0.6228	0.8449	0.2308
PCDH15	10	10:56435379	56435379	C	0.9427	0.5994	1.351	0.0991	0.7319	0.03598
PCDH15	10	10:56435911	56435911	G	2.163	0.05492	1.619	0.4195	3.216	0.033
PCDH15	10	10:56441751	56441751	T	1.084	0.6545	1.328	0.3344	1.019	0.9357
PCDH15	10	10:56448886	56448886	C	0.9417	0.7233	0.7005	0.1994	1.129	0.5726
PCDH15	10	10:56455262	56455262	G	1.071	0.8359	0.9138	0.8711	1.174	0.6994
PCDH15	10	10:56456576	56456576	G	0.8253	0.1015	0.7348	0.09373	0.8575	0.3256
PCDH15	10	10:56459925	56459925	G	1.915	0.1297	4.985	0.07586	1.414	0.4953
PCDH15	10	10:56462471	56462471	C	0.7736	0.06448	0.5906	0.01416	0.9501	0.781
PCDH15	10	10:56466912	56466912	G	1.072	0.7695	1.312	0.4957	0.9546	0.8804
PCDH15	10	10:56468565	56468565	T	1.132	0.5127	1.276	0.4719	1.09	0.7122
PCDH15	10	10:56469023	56469023	T	1.16	0.4006	1.289	0.4128	1.147	0.5305
PCDH15	10	10:56472980	56472980	T	1.16	0.4006	1.289	0.4128	1.147	0.5305
PCDH15	10	10:56475422	56475422	G	1.16	0.4006	1.289	0.4128	1.147	0.5305
PCDH15	10	10:56475993	56475993	A	0.5564	0.1589	0.3958	0.0873	0.9799	0.9758
PCDH15	10	10:56480288	56480288	A	1.16	0.4006	1.289	0.4128	1.147	0.5305
PCDH15	10	10:56482354	56482354	T	1.16	0.4006	1.289	0.4128	1.147	0.5305
PCDH15	10	10:56484454	56484454	A	1.16	0.4006	1.289	0.4128	1.147	0.5305
PCDH15	10	10:56484467	56484467	A	1.16	0.4006	1.289	0.4128	1.147	0.5305
PCDH15	10	10:56484962	56484962	T	1.16	0.4006	1.289	0.4128	1.147	0.5305
PCDH15	10	10:56485332	56485332	G	1.133	0.479	1.289	0.4128	1.109	0.6404
PCDH15	10	10:56486274	56486274	C	0.9706	0.9263	3.509	0.06009	0.4055	0.06742
PCDH15	10	10:56486529	56486529	T	1.121	0.5199	1.299	0.4043	1.1	0.6688
PCDH15	10	10:56487598	56487598	C	0.8351	0.1148	0.8021	0.2181	0.8276	0.2127
PCDH15	10	10:56487973	56487973	C	1.16	0.4006	1.289	0.4128	1.147	0.5305
PCDH15	10	10:56497659	56497659	G	1.183	0.129	0.9901	0.9551	1.381	0.02629
PCDH15	10	10:56502386	56502386	A	1.165	0.3361	1.497	0.1519	1.06	0.7715
PCDH15	10	10:56503019	56503019	C	1.477	0.07425	0.9271	0.8308	1.912	0.01634
PCDH15	10	10:56503477	56503477	C	0.9232	0.5994	1.309	0.2745	0.7181	0.1095
PCDH15	10	10:56504373	56504373	A	1.028	0.9066	1.349	0.4439	0.9069	0.753
PCDH15	10	10:56505025	56505025	A	1.364	0.2392	1.209	0.7282	1.398	0.2693
PCDH15	10	10:56505150	56505150	A	1.026	0.8611	1.329	0.2211	0.8597	0.4346
PCDH15	10	10:56509156	56509156	C	1.415	0.4821	0.5689	0.4049	3.69	0.07254
PCDH15	10	10:56512644	56512644	T	0.9197	0.4493	0.9859	0.9344	0.8355	0.2241
PCDH15	10	10:56521762	56521762	A	1.475	0.04317	0.928	0.8195	1.905	0.005977
PCDH15	10	10:56522384	56522384	C	0.9097	0.8333	0.6035	0.5351	1.036	0.948
PCDH15	10	10:56526932	56526932	T	0.7715	0.295	0.7281	0.411	0.8479	0.6117
PCDH15	10	10:56527608	56527608	A	0.9668	0.9002	1.287	0.5392	0.8147	0.5886
PCDH15	10	10:56531488	56531488	C	2.083	0.05637	2.368	0.1226	2.284	0.1276
PCDH15	10	10:56533083	56533083	G	1.045	0.7329	1.738	0.009609	0.7459	0.09078
PCDH15	10	10:56538759	56538759	A	1.065	0.6279	1.58	0.03118	0.8359	0.2926
PCDH15	10	10:56539408	56539408	A	1.352	0.2047	1.983	0.08725	1.119	0.7164
PCDH15	10	10:56542207	56542207	C	1.639	0.188	3.943	0.03758	1.107	0.8359
PCDH15	10	10:56544804	56544804	A	0.8055	0.2548	0.813	0.479	0.7997	0.3781
PCDH15	10	10:56545395	56545395	T	1.118	0.3227	0.9598	0.8251	1.228	0.1576
PCDH15	10	10:56545981	56545981	T	1.407	0.108	0.9033	0.7681	1.829	0.02155
PCDH15	10	10:56549712	56549712	C	1.651	0.1336	0.8131	0.7231	2.264	0.04402
PCDH15	10	10:56550769	56550769	C	1.896	0.007165	0.9403	0.8874	2.595	0.0007977
PCDH15	10	10:56569551	56569551	G	1.546	0.169	2.16	0.1171	1.282	0.5647
WT1	11	11:32426704	32426704	T	0.9339	0.5508	0.7862	0.1926	1.062	0.6849
WT1	11	11:32428164	32428164	T	0.9339	0.5508	0.7862	0.1926	1.062	0.6849
WT1	11	11:32434180	32434180	A	0.9253	0.4944	0.8178	0.2681	1.024	0.8734
WT1	11	11:32438684	32438684	A	0.8158	0.1969	0.7162	0.168	0.9308	0.7303
WT1	11	11:32444020	32444020	A	1.052	0.6539	1.118	0.554	1.034	0.8176
WT1	11	11:32446843	32446843	T	1.061	0.7961	1.007	0.9861	1.128	0.6786
WT1	11	11:32447864	32447864	A	1.088	0.505	1.097	0.663	1.033	0.8372
WT1	11	11:32453536	32453536	A	0.8781	0.2782	0.825	0.3383	0.9025	0.5018
WT1	11	11:32453622	32453622	A	1.051	0.6663	1.006	0.9749	1.072	0.649
WT1	11	11:32456085	32456085	T	1.029	0.9296	0.5796	0.2655	1.614	0.241
WT1	11	11:32457545	32457545	G	1.391	0.351	1.972	0.2068	1.195	0.7159
WT1	11	11:32458219	32458219	C	1.086	0.4765	1.275	0.2003	0.9769	0.8753
WT1	11	11:32459303	32459303	G	1.022	0.862	1.14	0.5251	0.9118	0.5621
WT1	11	11:32466649	32466649	T	0.9824	0.9005	0.9191	0.714	1.038	0.8367
WT1	11	11:32466931	32466931	C	1.563	0.2807	2.134	0.1706	1.289	0.7056
WT1	11	11:32426704	32426704	T	0.9339	0.5508	0.7862	0.1926	1.062	0.6849
WT1	11	11:32428164	32428164	T	0.9339	0.5508	0.7862	0.1926	1.062	0.6849
WT1	11	11:32434180	32434180	A	0.9253	0.4944	0.8178	0.2681	1.024	0.8734
WT1	11	11:32438684	32438684	A	0.8158	0.1969	0.7162	0.168	0.9308	0.7303
WT1	11	11:32444020	32444020	A	1.052	0.6539	1.118	0.554	1.034	0.8176
WT1	11	11:32446843	32446843	T	1.061	0.7961	1.007	0.9861	1.128	0.6786
WT1	11	11:32447864	32447864	A	1.088	0.505	1.097	0.663	1.033	0.8372
WT1	11	11:32453536	32453536	A	0.8781	0.2782	0.825	0.3383	0.9025	0.5018
WT1	11	11:32453622	32453622	A	1.051	0.6663	1.006	0.9749	1.072	0.649
WT1	11	11:32456085	32456085	T	1.029	0.9296	0.5796	0.2655	1.614	0.241
WT1	11	11:32457545	32457545	G	1.391	0.351	1.972	0.2068	1.195	0.7159
WT1	11	11:32458219	32458219	C	1.086	0.4765	1.275	0.2003	0.9769	0.8753
WT1	11	11:32459303	32459303	G	1.022	0.862	1.14	0.5251	0.9118	0.5621
WT1	11	11:32466649	32466649	T	0.9824	0.9005	0.9191	0.714	1.038	0.8367
WT1	11	11:32466931	32466931	C	1.563	0.2807	2.134	0.1706	1.289	0.7056
LRRC3B	3	3:26676590	26676590	A	1.075	0.5335	1.616	0.01216	0.8291	0.234
LRRC3B	3	3:26681962	26681962	A	0.8991	0.4177	0.6533	0.04583	1.037	0.8312
LRRC3B	3	3:26682359	26682359	C	0.9887	0.9338	0.7113	0.1086	1.264	0.1923
LRRC3B	3	3:26684231	26684231	T	1.061	0.7741	1.114	0.7371	1.119	0.6826
LRRC3B	3	3:26684538	26684538	T	0.9324	0.6577	0.7575	0.2794	0.9813	0.9261
LRRC3B	3	3:26684741	26684741	A	0.6429	0.01838	0.4043	0.002411	0.8693	0.559
LRRC3B	3	3:26685539	26685539	A	1.079	0.5407	0.7952	0.2665	1.261	0.1422
LRRC3B	3	3:26687577	26687577	G	0.7986	0.1491	0.3917	0.0005685	1.073	0.7109
LRRC3B	3	3:26688619	26688619	G	1.484	0.3866	0.9246	0.9103	2.467	0.1568
LRRC3B	3	3:26689144	26689144	T	0.9161	0.6354	0.9408	0.8337	0.8863	0.6252
LRRC3B	3	3:26691392	26691392	A	1.135	0.5529	1.752	0.1081	0.856	0.596
LRRC3B	3	3:26696574	26696574	C	0.9853	0.9033	0.8655	0.4795	1.031	0.8419
LRRC3B	3	3:26698677	26698677	C	0.9484	0.8241	1.325	0.5044	0.7839	0.4244
LRRC3B	3	3:26698857	26698857	C	0.9975	0.9825	1.194	0.3576	0.9337	0.6468
LRRC3B	3	3:26701336	26701336	T	0.8101	0.6859	0.8854	0.8794	0.7206	0.6396
LRRC3B	3	3:26702002	26702002	T	0.9791	0.8834	0.7194	0.154	1.281	0.1856
LRRC3B	3	3:26702501	26702501	G	1.146	0.6926	1.742	0.3405	0.785	0.6314
LRRC3B	3	3:26702980	26702980	A	1.068	0.5805	0.886	0.5334	1.223	0.1876
LRRC3B	3	3:26704577	26704577	C	1.028	0.8694	1.191	0.5281	0.9253	0.7251
LRRC3B	3	3:26709875	26709875	G	0.7834	0.4553	0.8598	0.7829	0.8278	0.6462
LRRC3B	3	3:26711014	26711014	A	2.147	0.1185	1.415	0.6838	2.634	0.09682
LRRC3B	3	3:26716793	26716793	A	0.5939	0.1343	0.6585	0.4568	0.5389	0.1854
LRRC3B	3	3:26720690	26720690	G	0.968	0.7766	0.9215	0.6537	0.9871	0.9311
LRRC3B	3	3:26734249	26734249	T	0.8754	0.6429	0.9379	0.8872	0.8076	0.573
LRRC3B	3	3:26735083	26735083	C	1.048	0.6799	0.8851	0.4857	0.9938	0.9672
LRRC3B	3	3:26736301	26736301	T	0.9532	0.7077	1.376	0.1218	0.722	0.05947
LRRC3B	3	3:26739312	26739312	G	1.005	0.9733	0.7667	0.2287	1.256	0.2362
LRRC3B	3	3:26751493	26751493	T	1.399	0.06113	1.269	0.4519	1.402	0.1243
LRRC3B	3	3:26754615	26754615	T	0.9672	0.805	0.9749	0.9059	0.9415	0.7333
LRRC3B	3	3:26755291	26755291	T	0.7764	0.6079	0.3675	0.32	1.057	0.9203
LRRC3B	3	3:26757184	26757184	C	1.176	0.7121	0.5799	0.4669	1.834	0.2612
LRRC3B	3	3:26761020	26761020	T	1.018	0.8999	1.163	0.5194	0.9001	0.5785
RGS12	4	4:3326393	3326393	A	1.007	0.9801	1.03	0.945	0.9248	0.8266
RGS12	4	4:3331378	3331378	T	1.007	0.9801	1.03	0.945	0.9248	0.8266
RGS12	4	4:3342137	3342137	A	1.16	0.3422	1.21	0.4654	1.079	0.7048
RGS12	4	4:3346617	3346617	A	1.038	0.8142	1.097	0.705	1	0.9999
RGS12	4	4:3352913	3352913	G	1.176	0.64	4.198	0.07472	0.7036	0.435
RGS12	4	4:3363031	3363031	A	1.04	0.9311	1.253	0.7455	0.8867	0.8496
RGS12	4	4:3370366	3370366	G	0.8568	0.2136	0.7467	0.1259	0.912	0.5814
RGS12	4	4:3374539	3374539	T	0.8796	0.2732	0.7705	0.1532	0.9415	0.6988
RGS12	4	4:3375722	3375722	T	1.002	0.9881	0.9576	0.8077	1.078	0.6116
RGS12	4	4:3384318	3384318	A	0.7806	0.5786	1.364	0.686	0.5218	0.3005
RGS12	4	4:3386817	3386817	T	1.177	0.4689	1.144	0.7012	1.255	0.4404
RGS12	4	4:3389110	3389110	T	1.207	0.3073	1.128	0.7003	1.322	0.2252
RGS12	4	4:3390900	3390900	A	1.001	0.9929	0.8151	0.3146	1.146	0.389
RGS12	4	4:3395406	3395406	T	1.109	0.6756	0.9606	0.9263	1.24	0.4716
RGS12	4	4:3401678	3401678	T	1.001	0.9944	0.8992	0.6494	1.083	0.65
RGS12	4	4:3406952	3406952	A	0.6953	0.3822	1.028	0.9621	0.4576	0.2538
RGS12	4	4:3409700	3409700	G	0.9818	0.882	1.19	0.3569	0.8346	0.2907
RGS12	4	4:3415378	3415378	G	1.107	0.4783	1.456	0.09781	0.8612	0.4499
RGS12	4	4:3416000	3416000	A	0.9433	0.754	0.838	0.5716	1.006	0.9779
RGS12	4	4:3419677	3419677	G	0.9661	0.7578	0.8933	0.528	1.031	0.834
RGS12	4	4:3420271	3420271	T	0.8285	0.3406	0.595	0.1056	0.9628	0.8794
RGS12	4	4:3424781	3424781	T	1.167	0.5732	1.094	0.8434	1.31	0.4359
RGS12	4	4:3424821	3424821	A	0.8423	0.5416	0.7318	0.5317	0.9263	0.8244
RGS12	4	4:3431195	3431195	G	1.011	0.9454	1.176	0.5579	0.9447	0.7733
RGS12	4	4:3433420	3433420	T	0.8645	0.488	0.8628	0.676	0.8358	0.5026
RGS12	4	4:3433782	3433782	A	1.041	0.7721	1.185	0.448	0.9086	0.5988
RGS12	4	4:3434885	3434885	G	0.9858	0.9017	0.8495	0.3677	1.07	0.6567
RGS12	4	4:3436405	3436405	A	0.869	0.708	0.885	0.8369	0.9077	0.8446
RGS12	4	4:3436588	3436588	A	1.075	0.5588	1.015	0.9395	1.076	0.6524
RGS12	4	4:3442146	3442146	C	0.9538	0.6792	0.8497	0.3731	1.063	0.6805
RGS12	4	4:3442259	3442259	A	1.128	0.6594	0.7398	0.4914	1.438	0.2901
RGS12	4	4:3447243	3447243	T	1.09	0.4949	1.094	0.6658	1.094	0.5825
RGS12	4	4:3451109	3451109	A	1.086	0.7167	1.194	0.6027	1.099	0.7636
JAG1	20	20:10628894	10628894	T	0.9957	0.9818	0.9494	0.8614	1.022	0.929
JAG1	20	20:10629525	10629525	C	1.091	0.6386	1.123	0.6874	1.156	0.5551
JAG1	20	20:10633313	10633313	T	0.834	0.1405	0.7965	0.2706	0.862	0.3426
JAG1	20	20:10639222	10639222	T	0.8005	0.08504	0.6969	0.1009	0.8974	0.5051
JAG1	20	20:10639543	10639543	G	0.9561	0.6918	1.116	0.5492	0.8349	0.2196
JAG1	20	20:10640201	10640201	A	0.9946	0.9726	0.9232	0.7517	0.9954	0.9823
JAG1	20	20:10640306	10640306	C	0.9076	0.4122	0.9893	0.9547	0.8683	0.3623
JAG1	20	20:10640846	10640846	A	0.9137	0.4356	0.9363	0.7262	0.8866	0.4241
JAG1	20	20:10641633	10641633	A	1.173	0.1996	1.065	0.7508	1.253	0.1585
JAG1	20	20:10644614	10644614	T	0.7605	0.5861	1.095	0.9096	0.5653	0.4297
JAG1	20	20:10644705	10644705	A	1.748	0.2782	2.094	0.404	1.509	0.5225
JAG1	20	20:10646729	10646729	A	1.11	0.813	1.164	0.845	1.162	0.7816
JAG1	20	20:10647679	10647679	G	1.02	0.9307	0.7362	0.3956	1.34	0.3245
JAG1	20	20:10648706	10648706	T	1.482	0.05978	1.349	0.4145	1.575	0.07434
JAG1	20	20:10652709	10652709	A	1.033	0.8738	0.6844	0.2499	1.398	0.2141
JAG1	20	20:10652959	10652959	T	1.465	0.2304	1.239	0.6574	1.836	0.1473
JAG1	20	20:10658467	10658467	A	0.9998	0.9995	1.275	0.6413	0.8873	0.8201
JAG1	20	20:10660188	10660188	A	0.697	0.2027	0.565	0.274	0.7704	0.4462
JAG1	20	20:10660638	10660638	C	1.181	0.6073	0.7236	0.5203	1.742	0.1887
GMDS-AS1	6	6:2256411	2256411	T	1.185	0.3018	1.112	0.7081	1.27	0.2453
GMDS-AS1	6	6:2257933	2257933	C	0.5332	0.03599	0.7468	0.5647	0.4227	0.03342
GMDS-AS1	6	6:2271034	2271034	C	0.8857	0.6375	0.6405	0.2741	1.079	0.8168
GMDS-AS1	6	6:2274255	2274255	G	0.9372	0.8347	0.9385	0.8999	0.8953	0.7866
GMDS-AS1	6	6:2276503	2276503	G	0.8767	0.4708	1.045	0.8814	0.8236	0.4161
GMDS-AS1	6	6:2277259	2277259	G	1.336	0.1221	1.266	0.47	1.391	0.1551
GMDS-AS1	6	6:2285356	2285356	T	0.5846	0.162	0.8363	0.7619	0.4369	0.1601
GMDS-AS1	6	6:2293020	2293020	C	0.8456	0.2299	1.218	0.3901	0.6868	0.04196
GMDS-AS1	6	6:2329626	2329626	A	1.128	0.5061	1.369	0.3166	0.9325	0.7628
GMDS-AS1	6	6:2334310	2334310	G	0.5875	0.1832	0.8231	0.7783	0.525	0.2201
GMDS-AS1	6	6:2355156	2355156	C	0.9449	0.618	1.019	0.9179	0.8484	0.2705
GMDS-AS1	6	6:2355313	2355313	C	0.9175	0.4511	0.948	0.7687	0.8552	0.3005
GMDS-AS1	6	6:2355675	2355675	C	0.9698	0.7877	1.04	0.8332	0.9662	0.8144
GMDS-AS1	6	6:2363505	2363505	G	1.152	0.4344	1.369	0.3166	0.9618	0.8668
GMDS-AS1	6	6:2365878	2365878	A	0.9385	0.6119	0.8969	0.5957	1.02	0.8997
GMDS-AS1	6	6:2366199	2366199	A	1.203	0.2757	0.9675	0.9007	1.474	0.08057
GMDS-AS1	6	6:2368685	2368685	A	0.848	0.456	0.7925	0.5137	0.935	0.8149
GMDS-AS1	6	6:2370332	2370332	T	1.128	0.4385	1.389	0.221	1.073	0.7203
GMDS-AS1	6	6:2371304	2371304	C	0.8402	0.1985	0.8981	0.6138	0.8401	0.3374
GMDS-AS1	6	6:2374821	2374821	G	1.192	0.2331	1.286	0.3013	1.058	0.7649
GMDS-AS1	6	6:2379615	2379615	G	0.7201	0.2468	0.7042	0.4281	0.7259	0.3993
GMDS-AS1	6	6:2381228	2381228	A	1.143	0.2859	1.282	0.2226	1.07	0.6767
GMDS-AS1	6	6:2381884	2381884	A	0.7313	0.04994	0.5829	0.05239	0.7891	0.2293
GMDS-AS1	6	6:2382395	2382395	G	1.107	0.4351	1.264	0.268	1.06	0.7261
GMDS-AS1	6	6:2390732	2390732	G	1.403	0.4795	4.598	0.1766	0.8321	0.7609
GMDS-AS1	6	6:2394304	2394304	T	0.7079	0.4355	0.3278	0.09957	1.126	0.8361
GMDS-AS1	6	6:2394812	2394812	G	1.066	0.5845	1.055	0.7774	1.07	0.6504
GMDS-AS1	6	6:2398657	2398657	A	0.8673	0.6334	0.887	0.7891	0.9614	0.925
GMDS-AS1	6	6:2399099	2399099	A	1.055	0.6638	1.063	0.7694	1.082	0.6178
GMDS-AS1	6	6:2403974	2403974	T	1.062	0.6112	0.9981	0.9922	1.103	0.52
GMDS-AS1	6	6:2405116	2405116	C	0.6912	0.06315	0.8918	0.7215	0.5849	0.04996
GMDS-AS1	6	6:2412228	2412228	T	0.8443	0.2111	0.9328	0.7614	0.7813	0.1531
GMDS-AS1	6	6:2415524	2415524	T	1.087	0.4581	1.102	0.5948	1.103	0.5004
GMDS-AS1	6	6:2416117	2416117	C	0.9981	0.9898	1.321	0.2882	0.8325	0.3335
DSCAM	21	21:41400858	41400858	G	1.257	0.2425	1.374	0.2796	1.2	0.4925
DSCAM	21	21:41415044	41415044	C	1.116	0.3366	1.061	0.7508	1.174	0.2764
DSCAM	21	21:41415904	41415904	G	0.816	0.333	1.165	0.6339	0.6291	0.1271
DSCAM	21	21:41416066	41416066	T	1.068	0.6379	0.9274	0.7339	1.19	0.3483
DSCAM	21	21:41417392	41417392	C	1.044	0.6892	0.9315	0.685	1.088	0.5419
DSCAM	21	21:41418208	41418208	T	0.9849	0.8967	0.8899	0.5447	1.009	0.9528
DSCAM	21	21:41424768	41424768	A	0.9394	0.7716	0.7152	0.3046	1.148	0.6215
DSCAM	21	21:41425261	41425261	A	1.049	0.689	1.181	0.3935	0.9674	0.8319
DSCAM	21	21:41425831	41425831	A	1.055	0.6213	0.979	0.9044	1.125	0.3994
DSCAM	21	21:41427880	41427880	G	0.897	0.5552	1.339	0.3592	0.6834	0.1153
DSCAM	21	21:41428439	41428439	C	0.9353	0.8155	0.7347	0.509	1.068	0.8603
DSCAM	21	21:41428836	41428836	G	1.029	0.8473	0.8569	0.5186	1.153	0.4549
DSCAM	21	21:41432501	41432501	A	1.194	0.7118	1.386	0.7039	1.082	0.8949
DSCAM	21	21:41434643	41434643	C	1.038	0.8108	1.332	0.3172	0.9111	0.6287
DSCAM	21	21:41434841	41434841	C	0.9236	0.4799	1.063	0.7333	0.8463	0.2579
DSCAM	21	21:41435825	41435825	C	0.9267	0.5832	0.978	0.9177	0.894	0.5403
DSCAM	21	21:41437954	41437954	G	1.134	0.6693	0.9755	0.9571	1.18	0.6621
DSCAM	21	21:41439703	41439703	C	0.7393	0.171	0.9673	0.9209	0.6369	0.1477
DSCAM	21	21:41445504	41445504	A	1.234	0.4951	0.912	0.8443	1.448	0.3471
DSCAM	21	21:41446936	41446936	A	1.006	0.9811	1.13	0.7643	0.9013	0.7365
DSCAM	21	21:41449773	41449773	T	0.9	0.6572	1.192	0.695	0.7621	0.3474
DSCAM	21	21:41450390	41450390	C	1.372	0.1937	1.361	0.4535	1.323	0.3602
DSCAM	21	21:41454734	41454734	C	0.9554	0.7764	0.9747	0.9187	0.9382	0.7647
DSCAM	21	21:41457292	41457292	T	1.052	0.7377	1.094	0.7108	1.049	0.8098
DSCAM	21	21:41462923	41462923	T	0.8065	0.6129	0.595	0.4258	1.081	0.8879
DSCAM	21	21:41464641	41464641	A	0.9626	0.7747	0.8067	0.2981	1.125	0.5016
DSCAM	21	21:41464948	41464948	T	0.88	0.3798	0.9668	0.8824	0.8307	0.3381
DSCAM	21	21:41466631	41466631	C	0.7059	0.2448	0.8185	0.6758	0.6096	0.2107
DSCAM	21	21:41470863	41470863	G	1.294	0.3736	1.069	0.9013	1.482	0.2555
DSCAM	21	21:41473566	41473566	G	0.9712	0.8632	1.006	0.9809	0.9373	0.7707
DSCAM	21	21:41474184	41474184	G	0.9402	0.8022	0.9123	0.8094	0.9773	0.9441
DSCAM	21	21:41488565	41488565	A	1.119	0.4139	1.129	0.5793	1.088	0.641
DSCAM	21	21:41489655	41489655	A	0.8313	0.2064	1.075	0.756	0.694	0.06311
DSCAM	21	21:41489667	41489667	T	1.151	0.6845	1.571	0.4433	0.9081	0.8295
DSCAM	21	21:41496605	41496605	A	0.9045	0.4311	0.8908	0.5772	0.892	0.4857
DSCAM	21	21:41498063	41498063	A	1.07	0.6815	1.025	0.9201	1.105	0.6506
DSCAM	21	21:41500042	41500042	G	1.094	0.565	1.368	0.2205	0.974	0.8966
DSCAM	21	21:41501157	41501157	T	1.054	0.7196	0.8921	0.6113	1.218	0.305
DSCAM	21	21:41505308	41505308	G	1.006	0.9845	1.482	0.4907	0.8753	0.7406
DSCAM	21	21:41505536	41505536	C	1.179	0.1595	1.112	0.5688	1.245	0.1472
DSCAM	21	21:41510350	41510350	A	1.005	0.9788	0.9676	0.9148	1.03	0.9033
DSCAM	21	21:41512269	41512269	T	1.197	0.4711	1.205	0.6868	1.148	0.6511
DSCAM	21	21:41512537	41512537	G	0.9997	0.9994	0.6463	0.5212	1.298	0.6184
DSCAM	21	21:41512872	41512872	T	1.007	0.9607	0.9238	0.7305	1.026	0.899
DSCAM	21	21:41513680	41513680	A	0.6019	0.07611	0.7661	0.5416	0.4791	0.07206
DSCAM	21	21:41515825	41515825	A	0.9986	0.9921	0.856	0.4702	1.163	0.4117
DSCAM	21	21:41516053	41516053	G	0.9141	0.6709	1.088	0.8021	0.8345	0.5184
DSCAM	21	21:41518280	41518280	G	1.002	0.989	0.9036	0.6142	1.13	0.4714
DSCAM	21	21:41518338	41518338	A	0.9913	0.9839	0.6517	0.5398	1.229	0.7031
DSCAM	21	21:41524468	41524468	A	1.092	0.546	1.068	0.7816	1.06	0.7572
DSCAM	21	21:41525276	41525276	T	1.042	0.7605	1.107	0.6278	0.9814	0.9167
DSCAM	21	21:41527915	41527915	C	0.9618	0.7362	0.8487	0.3835	1.072	0.6386
DSCAM	21	21:41531337	41531337	C	0.9323	0.6112	0.9553	0.839	0.9083	0.587
DSCAM	21	21:41531472	41531472	C	0.9471	0.716	1.038	0.8793	0.8878	0.5367
DSCAM	21	21:41531893	41531893	C	1.377	0.07103	1.45	0.2131	1.348	0.1823
DSCAM	21	21:41532014	41532014	C	0.8622	0.6674	1.026	0.9627	0.8458	0.7206
DSCAM	21	21:41532133	41532133	T	0.9407	0.8412	1.64	0.3451	0.6518	0.3098
DSCAM	21	21:41532537	41532537	G	1.189	0.2484	1.373	0.2268	1.082	0.6749
DSCAM	21	21:41532663	41532663	G	0.8443	0.2315	0.7833	0.258	0.926	0.6851
DSCAM	21	21:41533006	41533006	C	0.7469	0.1306	0.5792	0.06865	0.9149	0.7241
DSCAM	21	21:41533350	41533350	A	0.8568	0.1664	0.6664	0.02417	1.002	0.9868
DSCAM	21	21:41533432	41533432	A	0.8809	0.3073	0.6979	0.07919	1.003	0.9866
DSCAM	21	21:41533905	41533905	T	0.8935	0.6877	0.5742	0.1837	1.266	0.5295
DSCAM	21	21:41534335	41534335	A	1.634	0.006301	2.131	0.01178	1.424	0.1294
DSCAM	21	21:41534512	41534512	T	0.9243	0.5437	0.8595	0.4691	0.978	0.8948
DSCAM	21	21:41536208	41536208	G	0.8835	0.3757	0.7399	0.1678	0.9751	0.8907
DSCAM	21	21:41536215	41536215	A	0.8731	0.3956	0.7989	0.3719	0.9101	0.6508
DSCAM	21	21:41540088	41540088	G	0.8279	0.2681	0.6359	0.07468	1.052	0.8247
DSCAM	21	21:41541421	41541421	A	1.026	0.8732	1.432	0.1775	0.8498	0.4292
DSCAM	21	21:41545492	41545492	G	0.5075	0.1103	0.5193	0.2789	0.4837	0.2231
DSCAM	21	21:41546955	41546955	C	0.9115	0.4624	0.8199	0.3269	0.9841	0.9212
DSCAM	21	21:41547707	41547707	T	0.9563	0.7088	1.006	0.9768	0.9403	0.6856
DSCAM	21	21:41547881	41547881	A	0.9522	0.6816	1.006	0.9768	0.9356	0.6599
DSCAM	21	21:41555056	41555056	A	0.9881	0.9195	1.138	0.501	0.8824	0.4167
DSCAM	21	21:41555090	41555090	A	0.9928	0.9655	1.046	0.866	0.9738	0.9047
DSCAM	21	21:41556414	41556414	T	0.9981	0.9876	0.9492	0.7878	1.046	0.7759
DSCAM	21	21:41565282	41565282	A	0.9885	0.9482	0.9306	0.8051	1.012	0.9595
DSCAM	21	21:41565412	41565412	T	0.8831	0.3209	0.7622	0.1753	0.9773	0.8876
DSCAM	21	21:41566588	41566588	C	1.026	0.8264	1.083	0.6832	0.9927	0.9621
DSCAM	21	21:41566809	41566809	G	1.082	0.497	1.129	0.5279	1.054	0.7225
DSCAM	21	21:41570044	41570044	G	0.6274	0.1311	0.7452	0.5639	0.5658	0.1642
DSCAM	21	21:41577819	41577819	C	0.951	0.66	1.035	0.8577	0.9041	0.4889
DSCAM	21	21:41577858	41577858	A	0.9538	0.6795	1.035	0.8577	0.9118	0.5267
DSCAM	21	21:41577876	41577876	A	1.003	0.9827	0.968	0.8687	1.048	0.7724
DSCAM	21	21:41578239	41578239	T	1.124	0.5144	1.298	0.407	1.027	0.9074
DSCAM	21	21:41578613	41578613	C	1.138	0.2782	1.184	0.3775	1.13	0.4299
DSCAM	21	21:41581684	41581684	T	0.8635	0.4918	0.9301	0.8362	0.7635	0.3334
DSCAM	21	21:41582141	41582141	G	1.389	0.2887	0.8414	0.7487	1.733	0.1411
DSCAM	21	21:41589058	41589058	G	1.087	0.6979	1.492	0.2952	0.82	0.4757
DSCAM	21	21:41594621	41594621	A	0.8861	0.2871	0.8005	0.2288	0.9721	0.8459
DSCAM	21	21:41594679	41594679	G	0.8724	0.2284	0.7614	0.1386	0.9725	0.8481
DSCAM	21	21:41595003	41595003	G	1.123	0.6662	1.404	0.4509	0.908	0.7836
DSCAM	21	21:41595726	41595726	T	1.08	0.5185	1.127	0.5265	1.068	0.6713
DSCAM	21	21:41600531	41600531	G	1.007	0.9742	1.366	0.3729	0.8039	0.4405
DSCAM	21	21:41601422	41601422	A	1.18	0.1538	1.198	0.3185	1.182	0.2776
DSCAM	21	21:41603034	41603034	T	1.297	0.5176	9.064	0.04975	0.7648	0.5848
DSCAM	21	21:41606089	41606089	C	0.9805	0.9277	1.186	0.6494	0.8257	0.4938
DSCAM	21	21:41607538	41607538	G	0.9497	0.9222	1.354	0.7129	0.7203	0.6522
DSCAM	21	21:41611936	41611936	C	0.6449	0.3113	0.5809	0.3969	0.8248	0.7502
DSCAM	21	21:41615161	41615161	G	1.277	0.03345	1.131	0.4919	1.414	0.02302
DSCAM	21	21:41628089	41628089	T	0.997	0.9849	0.9612	0.8764	1.074	0.726
DSCAM	21	21:41629273	41629273	C	0.9747	0.8648	1.11	0.6829	0.9201	0.6664
DSCAM	21	21:41631203	41631203	C	1.197	0.1446	1.284	0.2166	1.167	0.3236
DSCAM	21	21:41639831	41639831	A	1.033	0.8105	0.9496	0.8209	1.101	0.5704
DSCAM	21	21:41649097	41649097	C	0.739	0.01366	0.7155	0.08267	0.7739	0.1129
DSCAM	21	21:41662028	41662028	C	1.818	0.08348	1.011	0.9811	3.26	0.01419
DSCAM	21	21:41663512	41663512	T	0.7558	0.3078	0.7924	0.5878	0.7711	0.4739
DSCAM	21	21:41664110	41664110	T	0.887	0.6062	0.8504	0.6591	0.9568	0.8886
DSCAM	21	21:41664123	41664123	A	0.8522	0.4974	0.7929	0.5356	0.936	0.8341
DSCAM	21	21:41664277	41664277	C	0.9032	0.3784	0.6984	0.05127	1.07	0.6561
DSCAM	21	21:41667714	41667714	T	0.9957	0.9833	2.124	0.06835	0.6821	0.1487
DSCAM	21	21:41668783	41668783	T	1.266	0.1494	1.857	0.02855	0.9512	0.8144
DSCAM	21	21:41669300	41669300	T	0.7301	0.1267	0.8923	0.7248	0.6556	0.1311
DSCAM	21	21:41669855	41669855	T	1.162	0.613	1.474	0.4612	0.9611	0.9157
DSCAM	21	21:41672532	41672532	C	1.017	0.8879	0.95	0.7949	1.061	0.703
DSCAM	21	21:41673535	41673535	A	1.007	0.9566	0.95	0.7949	1.043	0.7866
DSCAM	21	21:41673539	41673539	G	0.9922	0.9483	0.9491	0.7909	1.018	0.9072
DSCAM	21	21:41673943	41673943	T	1.221	0.3885	1.953	0.1352	0.9387	0.8278
DSCAM	21	21:41675556	41675556	A	1.403	0.3691	1.368	0.6702	1.403	0.4398
DSCAM	21	21:41675940	41675940	A	1.964	0.09979	9.982	0.03708	1.159	0.773
DSCAM	21	21:41684090	41684090	T	0.9127	0.705	1.715	0.2048	0.5923	0.1074
DSCAM	21	21:41686139	41686139	G	0.935	0.6214	0.734	0.1364	1.092	0.6265
DSCAM	21	21:41686694	41686694	C	0.8429	0.6142	0.5559	0.1967	1.534	0.3989
DSCAM	21	21:41691167	41691167	A	0.4182	0.08392	0.1476	0.01549	0.7317	0.6189
DSCAM	21	21:41693634	41693634	C	1.131	0.3344	1.061	0.7794	1.191	0.2856
DSCAM	21	21:41695429	41695429	T	1.032	0.9283	1.258	0.7383	0.9002	0.8083
DSCAM	21	21:41698322	41698322	C	1.024	0.8383	1.036	0.8503	1.043	0.7824
DSCAM	21	21:41707763	41707763	T	1.006	0.9866	1.285	0.6944	0.8979	0.7829
DSCAM	21	21:41708994	41708994	G	1.002	0.9843	1.179	0.3909	0.9315	0.6423
DSCAM	21	21:41710696	41710696	T	0.663	0.2053	0.3578	0.0275	0.9937	0.9885
DSCAM	21	21:41711460	41711460	T	0.7825	0.6021	0.4924	0.3702	0.9693	0.9566
DSCAM	21	21:41711938	41711938	A	0.9333	0.7212	1.016	0.9583	0.9196	0.7374
DSCAM	21	21:41719477	41719477	T	0.6759	0.3121	1.068	0.9129	0.5035	0.2056
DSCAM	21	21:41720401	41720401	G	2.063	0.05525	1.808	0.273	3.377	0.02867
DSCAM	21	21:41725303	41725303	C	0.9541	0.6926	1.041	0.841	0.9279	0.6171
DSCAM	21	21:41725630	41725630	C	1.257	0.1962	0.9863	0.962	1.435	0.1064
DSCAM	21	21:41725816	41725816	C	1.39	0.5065	1.662	0.5059	1.286	0.7237
DSCAM	21	21:41730462	41730462	A	1.281	0.1212	1.487	0.1416	1.204	0.3526
DSCAM	21	21:41737732	41737732	G	0.8497	0.1992	0.7694	0.2283	0.8935	0.4749
DSCAM	21	21:41738635	41738635	G	0.9622	0.8525	0.8632	0.643	1.001	0.9984
DSCAM	21	21:41739992	41739992	T	1.381	0.07936	1.02	0.9438	1.746	0.02445
DSCAM	21	21:41745001	41745001	A	0.9851	0.906	1.164	0.4766	0.9156	0.5815
DSCAM	21	21:41750435	41750435	C	0.9541	0.7077	0.7977	0.2935	1.038	0.8111
DSCAM	21	21:41759782	41759782	G	1.58	0.126	3.596	0.03463	1.081	0.8363
DSCAM	21	21:41761502	41761502	T	0.7828	0.5732	0.8142	0.7443	0.8718	0.8223
DSCAM	21	21:41763258	41763258	G	0.8669	0.2376	0.8426	0.3942	0.8792	0.4011
DSCAM	21	21:41764600	41764600	A	1.316	0.1911	1.348	0.4226	1.24	0.4044
DSCAM	21	21:41764736	41764736	A	0.9122	0.4636	1.025	0.9071	0.8701	0.3827
DSCAM	21	21:41766509	41766509	T	0.7708	0.4788	0.8441	0.7715	0.7152	0.5019
DSCAM	21	21:41766881	41766881	G	0.667	0.0881	0.5083	0.07137	0.7971	0.4631
DSCAM	21	21:41767341	41767341	G	0.8761	0.7652	0.5739	0.4003	1.126	0.8479
DSCAM	21	21:41768179	41768179	G	0.8354	0.5853	0.7094	0.512	1.022	0.9594
DSCAM	21	21:41769924	41769924	T	1.106	0.543	1.602	0.1052	0.9519	0.813
DSCAM	21	21:41776046	41776046	G	1.131	0.7334	1.035	0.9504	1.245	0.6427
DSCAM	21	21:41776253	41776253	A	0.8948	0.578	0.8128	0.5192	0.9452	0.8264
DSCAM	21	21:41780398	41780398	A	0.7934	0.165	0.7145	0.2223	0.8667	0.5004
DSCAM	21	21:41783102	41783102	T	0.8663	0.3921	0.8535	0.537	0.8496	0.472
DSCAM	21	21:41786287	41786287	A	0.8943	0.4969	0.8721	0.5874	0.883	0.573
DSCAM	21	21:41790020	41790020	A	1.088	0.5331	1.318	0.2154	0.9926	0.9656
DSCAM	21	21:41792388	41792388	A	0.9048	0.3838	0.7618	0.1496	0.997	0.9836
DSCAM	21	21:41801495	41801495	C	1.109	0.6546	1.354	0.4695	0.9784	0.9404
DSCAM	21	21:41803847	41803847	T	1.369	0.5087	2.328	0.2718	1.136	0.8412
DSCAM	21	21:41804950	41804950	G	1.431	0.3729	0.9393	0.9324	1.639	0.2873
DSCAM	21	21:41811003	41811003	T	1.621	0.1676	4.037	0.08658	1.122	0.7867
DSCAM	21	21:41813285	41813285	T	1.074	0.5229	1.103	0.5976	0.9535	0.7384
DSCAM	21	21:41816195	41816195	G	0.9923	0.944	0.9078	0.584	1.068	0.6462
DSCAM	21	21:41816354	41816354	A	0.9263	0.5132	0.9256	0.6694	0.9142	0.5711
DSCAM	21	21:41823356	41823356	G	1.166	0.1822	1.203	0.314	1.107	0.5034
DSCAM	21	21:41827422	41827422	A	1.217	0.6135	0.581	0.3954	1.92	0.1774
DSCAM	21	21:41831359	41831359	T	0.9868	0.9681	2.222	0.1363	0.4746	0.1361
DSCAM	21	21:41833884	41833884	T	1.041	0.7227	1.032	0.8651	1.082	0.5896
DSCAM	21	21:41835750	41835750	T	0.8383	0.2671	0.899	0.6589	0.7943	0.2892
DSCAM	21	21:41837293	41837293	T	1.092	0.5516	1.053	0.8308	1.136	0.5003
DSCAM	21	21:41841244	41841244	A	1.186	0.7273	1.678	0.5203	1.126	0.8519
DSCAM	21	21:41842252	41842252	G	0.8742	0.3602	0.9231	0.7325	0.8485	0.3953
DSCAM	21	21:41844939	41844939	A	1.172	0.2014	1.003	0.9878	1.258	0.1539
DSCAM	21	21:41848725	41848725	G	1.124	0.7772	0.6334	0.4399	1.961	0.2471
DSCAM	21	21:41850636	41850636	C	0.8597	0.2646	0.7635	0.1968	0.9305	0.6899
DSCAM	21	21:41855972	41855972	C	1.117	0.392	1.33	0.1684	1.019	0.9122
DSCAM	21	21:41859794	41859794	A	1.075	0.8058	1.27	0.633	0.902	0.7884
DSCAM	21	21:41865052	41865052	T	0.8782	0.2641	1.091	0.6505	0.7717	0.08416
DSCAM	21	21:41875851	41875851	C	1.496	0.167	1.064	0.9052	1.428	0.3093
DSCAM	21	21:41879326	41879326	A	0.8455	0.1492	0.8816	0.506	0.8243	0.1983
DSCAM	21	21:41893186	41893186	C	0.818	0.4648	0.737	0.4335	0.9208	0.8304
DSCAM	21	21:41896416	41896416	T	1.227	0.5919	1.188	0.7311	1.207	0.743
DSCAM	21	21:41899191	41899191	T	1.022	0.8724	0.9462	0.799	1.052	0.7828
DSCAM	21	21:41902761	41902761	T	0.911	0.4018	0.9194	0.6456	0.9228	0.5753
DSCAM	21	21:41902816	41902816	T	0.889	0.8	0.4472	0.2654	1.752	0.3552
DSCAM	21	21:41902991	41902991	C	0.851	0.5413	1.038	0.9343	0.7339	0.3691
DSCAM	21	21:41906815	41906815	G	1.057	0.6311	0.9425	0.7498	1.09	0.57
DSCAM	21	21:41910362	41910362	A	0.9517	0.6726	0.8267	0.3172	1.02	0.8981
DSCAM	21	21:41910647	41910647	C	1.138	0.2708	1.121	0.5526	1.146	0.3679
DSCAM	21	21:41914754	41914754	G	0.6711	0.341	1.086	0.9073	0.5426	0.2756
DSCAM	21	21:41917406	41917406	G	1.024	0.8429	1.176	0.4185	0.947	0.7244
DSCAM	21	21:41917703	41917703	A	0.7999	0.4946	0.7945	0.7059	0.7462	0.4617
DSCAM	21	21:41917971	41917971	C	1.323	0.3254	1.011	0.9831	1.454	0.2647
DSCAM	21	21:41918117	41918117	G	0.8115	0.3103	0.6751	0.1686	1.043	0.8869
DSCAM	21	21:41918407	41918407	T	1.42	0.1301	1.968	0.05891	1.13	0.7065
DSCAM	21	21:41918958	41918958	C	0.9667	0.7933	1.098	0.6526	0.8844	0.4672
DSCAM	21	21:41921960	41921960	T	1.149	0.2289	1.131	0.5208	1.194	0.2319
DSCAM	21	21:41924389	41924389	C	0.845	0.5125	1.141	0.7534	0.654	0.2208
DSCAM	21	21:41928606	41928606	A	1.119	0.3164	0.9775	0.9021	1.254	0.1186
DSCAM	21	21:41932078	41932078	C	0.8846	0.3311	0.8952	0.5912	0.8439	0.3005
DSCAM	21	21:41934946	41934946	C	1.08	0.7137	1.126	0.7291	0.9705	0.9127
DSCAM	21	21:41935083	41935083	T	0.8905	0.6911	1.643	0.2511	0.4919	0.1237
DSCAM	21	21:41937830	41937830	A	1.036	0.7619	0.9543	0.8107	1.127	0.4268
DSCAM	21	21:41940803	41940803	T	1.18	0.2205	1.185	0.4469	1.195	0.3003
DSCAM	21	21:41944418	41944418	T	1.166	0.6971	1.635	0.4525	1.076	0.8845
DSCAM	21	21:41948547	41948547	G	0.644	0.04744	0.5977	0.121	0.6298	0.1389
DSCAM	21	21:41949081	41949081	C	0.9318	0.8658	0.6185	0.4869	1.232	0.6827
DSCAM	21	21:41951593	41951593	C	0.8584	0.7215	0.6152	0.4826	1.093	0.8676
DSCAM	21	21:41951756	41951756	A	0.9626	0.759	0.9414	0.7659	0.9696	0.8462
DSCAM	21	21:41953206	41953206	T	0.7607	0.3939	0.5386	0.1991	0.9878	0.9765
DSCAM	21	21:41953694	41953694	A	0.9934	0.957	0.9732	0.8927	1.001	0.996
DSCAM	21	21:41958912	41958912	A	0.9505	0.8085	0.9609	0.904	0.9032	0.7099
DSCAM	21	21:41959531	41959531	G	0.9041	0.3794	0.982	0.9249	0.8311	0.2012
DSCAM	21	21:41962473	41962473	G	1.125	0.3721	1.09	0.6962	1.162	0.3682
DSCAM	21	21:41964695	41964695	C	0.9746	0.8194	0.8791	0.4858	0.996	0.9781
DSCAM	21	21:41966619	41966619	A	1.042	0.7211	0.9473	0.7685	1.081	0.6013
DSCAM	21	21:41967443	41967443	C	0.6606	0.1094	0.699	0.3625	0.5867	0.1399
DSCAM	21	21:41968812	41968812	T	0.9618	0.7327	0.9332	0.7065	0.9437	0.6953
DSCAM	21	21:41969281	41969281	A	0.7333	0.15	0.6887	0.2661	0.732	0.2798
DSCAM	21	21:41985579	41985579	A	0.8873	0.7662	0.6492	0.5377	1.016	0.974
DSCAM	21	21:41986000	41986000	C	1.081	0.5506	0.9184	0.6906	1.208	0.257
DSCAM	21	21:41986158	41986158	A	1.13	0.3706	1.292	0.2406	1.025	0.8881
DSCAM	21	21:41993707	41993707	C	0.7844	0.173	0.751	0.3015	0.7495	0.2307
DSCAM	21	21:41994202	41994202	C	0.9314	0.7373	0.8455	0.6195	0.9775	0.9344
DSCAM	21	21:41994240	41994240	A	0.5646	0.1251	0.6618	0.4597	0.4821	0.1625
DSCAM	21	21:41995594	41995594	A	0.9829	0.9399	0.9794	0.9527	1.056	0.858
DSCAM	21	21:41995874	41995874	C	1.425	0.002996	1.674	0.0105	1.293	0.08897
DSCAM	21	21:41999407	41999407	G	1.431	0.00223	1.516	0.02981	1.354	0.0436
DSCAM	21	21:42002796	42002796	C	1.154	0.6387	1.424	0.5195	1.062	0.8733
DSCAM	21	21:42003934	42003934	T	1.187	0.2854	1.134	0.6359	1.169	0.4452
DSCAM	21	21:42005707	42005707	G	0.7125	0.00483	0.6817	0.04965	0.7257	0.0379
DSCAM	21	21:42006441	42006441	T	1.198	0.21	1.186	0.4733	1.174	0.3784
DSCAM	21	21:42007371	42007371	A	1.264	0.5725	1.362	0.7242	1.246	0.6487
DSCAM	21	21:42010384	42010384	G	0.7235	0.05851	0.583	0.04717	0.8517	0.4667
DSCAM	21	21:42010518	42010518	T	1.246	0.05479	1.573	0.01789	1.075	0.6189
DSCAM	21	21:42011613	42011613	A	0.983	0.9673	0.8346	0.7612	1.133	0.8315
DSCAM	21	21:42012885	42012885	A	0.8886	0.6159	1.051	0.9125	0.7841	0.3972
DSCAM	21	21:42013989	42013989	G	0.791	0.317	1.118	0.7786	0.6508	0.169
DSCAM	21	21:42014135	42014135	C	0.8616	0.2126	0.7246	0.1017	0.9415	0.6948
DSCAM	21	21:42014265	42014265	T	0.8616	0.2126	0.7246	0.1017	0.9415	0.6948
DSCAM	21	21:42014275	42014275	C	0.8138	0.2087	0.6484	0.07636	1.006	0.9801
DSCAM	21	21:42016014	42016014	A	1.11	0.3685	1.399	0.07758	0.9474	0.7194
DSCAM	21	21:42017227	42017227	T	0.8947	0.6547	0.4188	0.0324	1.46	0.2246
DSCAM	21	21:42021057	42021057	C	0.9246	0.5093	0.8951	0.571	0.9456	0.7129
DSCAM	21	21:42022469	42022469	T	0.858	0.2051	0.803	0.2695	0.9099	0.5408
DSCAM	21	21:42023554	42023554	T	1.075	0.5478	1.209	0.329	0.9401	0.6978
DSCAM	21	21:42023597	42023597	T	0.8628	0.3639	0.7962	0.3398	0.9946	0.9811
DSCAM	21	21:42024279	42024279	C	1.101	0.5994	0.8087	0.4896	1.268	0.2922
DSCAM	21	21:42026941	42026941	T	1.14	0.3512	1.003	0.9894	1.229	0.2338
DSCAM	21	21:42028282	42028282	T	1.181	0.1783	1.241	0.278	1.158	0.363
DSCAM	21	21:42030318	42030318	T	1.157	0.248	1.175	0.4378	1.177	0.3083
DSCAM	21	21:42030549	42030549	A	1.105	0.3928	1.178	0.3777	1.09	0.5747
DSCAM	21	21:42030865	42030865	C	0.8864	0.2935	0.8397	0.3245	0.8968	0.4796
DSCAM	21	21:42030923	42030923	G	0.8354	0.2886	0.6833	0.1304	1.038	0.872
DSCAM	21	21:42031522	42031522	C	1.189	0.1791	1.145	0.5039	1.274	0.1537
DSCAM	21	21:42032996	42032996	C	1.172	0.4051	1.191	0.5534	1.253	0.3819
DSCAM	21	21:42038328	42038328	G	0.9503	0.6743	0.9561	0.8206	0.9483	0.734
DSCAM	21	21:42038943	42038943	T	0.9667	0.8372	0.9213	0.7493	0.9592	0.8479
DSCAM	21	21:42040655	42040655	C	0.9757	0.8477	0.9963	0.9852	0.9163	0.6034
DSCAM	21	21:42042130	42042130	A	0.9432	0.618	0.9657	0.8579	0.92	0.5792
DSCAM	21	21:42042837	42042837	A	0.9471	0.8153	0.9321	0.8434	0.9138	0.772
DSCAM	21	21:42047446	42047446	T	0.8814	0.2843	0.9443	0.7671	0.794	0.1283
DSCAM	21	21:42047889	42047889	T	0.8405	0.2982	0.8747	0.6528	0.7882	0.2471
DSCAM	21	21:42048397	42048397	T	1.348	0.5319	2.257	0.3797	1.099	0.8668
DSCAM	21	21:42050504	42050504	T	0.9588	0.7329	0.8213	0.3086	1.108	0.5328
DSCAM	21	21:42050958	42050958	C	0.9966	0.9838	1.106	0.7062	0.8893	0.5943
DSCAM	21	21:42051274	42051274	C	1.262	0.5681	2	0.2219	0.8744	0.8415
DSCAM	21	21:42052490	42052490	A	0.8981	0.3425	1.033	0.8656	0.8057	0.1358
DSCAM	21	21:42056903	42056903	C	0.7511	0.3184	0.6876	0.3904	0.7668	0.4856
DSCAM	21	21:42057255	42057255	T	1.49	0.1699	1.097	0.8437	1.724	0.1364
DSCAM	21	21:42059090	42059090	T	0.9022	0.3797	0.9886	0.9513	0.8297	0.2264
DSCAM	21	21:42059209	42059209	C	1.199	0.2704	1.411	0.2042	1.082	0.7116
DSCAM	21	21:42062470	42062470	T	0.5997	0.03275	0.7253	0.3595	0.4751	0.03486
DSCAM	21	21:42064088	42064088	T	0.8908	0.3178	0.834	0.3197	0.976	0.874
DSCAM	21	21:42066253	42066253	G	1.062	0.7931	1.522	0.2328	0.7868	0.4699
DSCAM	21	21:42069068	42069068	C	1.192	0.1834	1.065	0.7673	1.234	0.2155
DSCAM	21	21:42085861	42085861	C	0.9714	0.9153	1.048	0.9164	0.8501	0.6484
DSCAM	21	21:42085920	42085920	C	0.921	0.5719	1.338	0.2123	0.7154	0.09401
DSCAM	21	21:42092530	42092530	C	0.8037	0.5071	1.554	0.3949	0.4051	0.0834
DSCAM	21	21:42095185	42095185	G	0.6141	0.2539	0.6116	0.4366	0.5774	0.3622
DSCAM	21	21:42099687	42099687	T	1.117	0.5046	1.435	0.1656	0.9848	0.9456
DSCAM	21	21:42104691	42104691	C	1.29	0.4369	1.448	0.5505	1.212	0.6217
DSCAM	21	21:42105523	42105523	C	0.9983	0.9889	1.209	0.3413	0.8831	0.4381
DSCAM	21	21:42106084	42106084	A	0.6605	0.09575	0.7537	0.4602	0.54	0.08007
DSCAM	21	21:42106963	42106963	T	1.229	0.4679	0.9494	0.9213	1.385	0.3283
DSCAM	21	21:42108446	42108446	A	1.163	0.6643	2.713	0.1686	0.821	0.6432
DSCAM	21	21:42110001	42110001	A	0.7444	0.02178	0.9212	0.6932	0.6338	0.007858
DSCAM	21	21:42110235	42110235	T	0.9459	0.6346	0.7509	0.1105	1.142	0.4026
DSCAM	21	21:42112368	42112368	C	0.8219	0.6649	0.9236	0.9056	0.6383	0.4836
DSCAM	21	21:42124011	42124011	A	1.171	0.1711	1.319	0.1389	1.103	0.5141
DSCAM	21	21:42127948	42127948	C	0.7723	0.02747	0.8327	0.3393	0.7075	0.0241
DSCAM	21	21:42128855	42128855	G	0.7863	0.04059	0.8327	0.3393	0.7273	0.03846
DSCAM	21	21:42137513	42137513	A	1.028	0.8202	0.8044	0.2282	1.288	0.1302
DSCAM	21	21:42137831	42137831	G	0.8361	0.3379	0.9625	0.9046	0.7418	0.2165
DSCAM	21	21:42140696	42140696	C	0.9338	0.7093	0.8554	0.5899	1.083	0.7421
DSCAM	21	21:42157256	42157256	A	1.001	0.9924	0.8872	0.5028	1.069	0.6482
DSCAM	21	21:42160430	42160430	G	0.8755	0.3252	0.8777	0.5499	0.8237	0.2763
DSCAM	21	21:42168191	42168191	T	1.083	0.4888	1.236	0.2398	1.021	0.8922
DSCAM	21	21:42168325	42168325	T	1.292	0.18	1.095	0.7767	1.42	0.1413
DSCAM	21	21:42169757	42169757	G	1.177	0.5311	0.626	0.3243	1.452	0.2162
DSCAM	21	21:42183389	42183389	T	0.8465	0.2971	0.866	0.5753	0.7947	0.2741
DSCAM	21	21:42184644	42184644	A	1.241	0.5084	1.646	0.4244	1.155	0.7153
DSCAM	21	21:42184759	42184759	G	0.9524	0.7638	1.029	0.9153	0.9421	0.7711
DSCAM	21	21:42186421	42186421	T	0.8268	0.5513	0.701	0.4435	0.9064	0.8274
DSCAM	21	21:42187416	42187416	G	0.9029	0.4606	0.9546	0.8366	0.8817	0.4822
DSCAM	21	21:42188846	42188846	T	0.5303	0.1577	0.388	0.1768	0.6324	0.4372
DSCAM	21	21:42190594	42190594	T	0.9048	0.5638	0.951	0.8607	0.8521	0.4773
DSCAM	21	21:42190846	42190846	A	0.9284	0.6913	0.784	0.469	1	0.9986
DSCAM	21	21:42191008	42191008	T	1.035	0.9061	0.9298	0.8635	1.069	0.8664
DSCAM	21	21:42195528	42195528	C	1.124	0.6121	0.8317	0.657	1.331	0.2992
DSCAM	21	21:42197200	42197200	T	2.431	0.007665	8.149	0.006314	1.295	0.5339
DSCAM	21	21:42198154	42198154	G	0.8969	0.3514	1.147	0.4579	0.725	0.03896
DSCAM	21	21:42201145	42201145	A	1.161	0.3199	1.348	0.2369	1.073	0.7125
DSCAM	21	21:42201615	42201615	T	1.043	0.7227	1.018	0.9248	1.045	0.7739
DSCAM	21	21:42202658	42202658	A	1.109	0.6624	1.097	0.8096	1.07	0.825
DSCAM	21	21:42205386	42205386	T	1.016	0.9035	1.039	0.8568	1.001	0.9962
DSCAM	21	21:42208057	42208057	C	1.224	0.1288	1.05	0.8283	1.355	0.0641
DSCAM	21	21:42208121	42208121	T	1.056	0.7127	1.362	0.1872	0.8541	0.439
DSCAM	21	21:42208288	42208288	T	0.8616	0.2305	0.7748	0.1947	0.9345	0.6765
DSCAM	21	21:42208468	42208468	C	0.9952	0.9654	0.8384	0.3384	1.129	0.3859
DSCAM	21	21:42209641	42209641	A	1.045	0.7001	0.9087	0.6111	1.126	0.4109
DSCAM	21	21:42210001	42210001	T	0.9826	0.8834	0.9549	0.8073	1.009	0.9544
DSCAM	21	21:42212238	42212238	T	1.096	0.4023	0.9564	0.8059	1.195	0.2043
DSCAM	21	21:42215370	42215370	G	0.9776	0.9498	1.025	0.9678	0.9252	0.8645
DSCAM	21	21:42219324	42219324	A	1.126	0.6818	1.284	0.6049	1.073	0.8489
DSCAM	21	21:42219820	42219820	C	1.061	0.6006	1.136	0.4726	0.9791	0.8887
DSCAM	21	21:42221247	42221247	A	0.9482	0.6528	0.7466	0.1279	1.132	0.4162
DSCAM	21	21:42221668	42221668	T	1.328	0.3999	1.179	0.7691	1.327	0.5041
DSCAM	21	21:42222399	42222399	C	1.106	0.6504	1.405	0.348	0.917	0.7696
DSCAM	21	21:42224601	42224601	G	0.9368	0.6029	0.7327	0.1206	1.104	0.5422
DSCAM	21	21:42224966	42224966	A	0.9932	0.974	1.394	0.3249	0.7267	0.2783
DSCAM	21	21:42225886	42225886	C	1.147	0.6737	1.061	0.9002	1.159	0.744
DSCAM	21	21:42225922	42225922	G	0.8315	0.2917	0.9739	0.9284	0.7419	0.1911
DSCAM	21	21:42226080	42226080	C	0.9861	0.914	1.142	0.5227	0.9117	0.5815
DSCAM	21	21:42226166	42226166	A	1.166	0.1644	1.367	0.07911	1.095	0.5299
DSCAM	21	21:42226423	42226423	A	1.464	0.0248	1.468	0.1502	1.412	0.1213
DSCAM	21	21:42226663	42226663	A	1.262	0.3495	1.235	0.637	1.263	0.4351
IL2RB	22	22:37533068	37533068	A	0.8053	0.08749	0.9232	0.7073	0.736	0.05982
IL2RB	22	22:37533143	37533143	G	1.035	0.8396	0.9581	0.873	1.123	0.6137
IL2RB	22	22:37534034	37534034	A	0.9383	0.5808	1.043	0.8244	0.8671	0.3327
IL2RB	22	22:37535471	37535471	T	1.076	0.6317	0.9415	0.8043	1.175	0.4122
IL2RB	22	22:37535948	37535948	A	1.057	0.6294	1.143	0.4877	1.012	0.9363
IL2RB	22	22:37538508	37538508	A	1.43	0.2085	2.934	0.11	1.146	0.6776
IL2RB	22	22:37538987	37538987	G	1.116	0.4686	0.9965	0.9882	1.171	0.4279
IL2RB	22	22:37539963	37539963	A	1.451	0.1372	0.8654	0.7239	1.852	0.04964
IL2RB	22	22:37541812	37541812	C	1.3	0.03825	1.486	0.06493	1.171	0.3254
IL2RB	22	22:37542731	37542731	A	1.042	0.9365	2.281	0.3477	0.6011	0.4947
IL2RB	22	22:37542861	37542861	T	1.217	0.446	0.5854	0.2103	1.713	0.0927
IL2RB	22	22:37543156	37543156	A	1.136	0.5465	1.238	0.5396	1.109	0.7002
IL2RB	22	22:37543173	37543173	G	0.7783	0.1712	0.9099	0.7353	0.7114	0.1793
IL2RB	22	22:37543320	37543320	A	0.9697	0.9088	1.442	0.4098	0.7244	0.3927
IL2RB	22	22:37544107	37544107	G	1.169	0.3744	0.9865	0.9624	1.271	0.2906
IL2RB	22	22:37544445	37544445	C	0.9765	0.9591	1.536	0.5488	0.6038	0.48
IL2RB	22	22:37544810	37544810	A	0.9814	0.9089	1.068	0.79	0.9309	0.7482
IL2RB	22	22:37544931	37544931	A	0.7133	0.04673	0.6579	0.1182	0.7942	0.2985
IL2RB	22	22:37547987	37547987	T	0.7735	0.3054	0.4966	0.09357	1.101	0.7551
IL2RB	22	22:37548882	37548882	G	1.387	0.1116	1.788	0.1092	1.231	0.4221
IL2RB	22	22:37550999	37550999	G	0.8417	0.6775	0.841	0.7887	0.7332	0.5827
IL2RB	22	22:37551371	37551371	T	1.982	0.1261	7.381	0.06674	0.9847	0.9794
IL2RB	22	22:37551607	37551607	G	1.161	0.1758	1.332	0.104	1.031	0.8327
IL2RB	22	22:37553422	37553422	A	1.185	0.6651	0.4986	0.2515	1.772	0.2489
IL2RB	22	22:37553619	37553619	C	1.118	0.3255	1.255	0.2112	1.011	0.9425
IL2RB	22	22:37558279	37558279	T	1.003	0.9815	0.8946	0.5451	1.083	0.6035
IL2RB	22	22:37559801	37559801	T	0.6266	0.2109	0.5072	0.1609	0.8204	0.7379
IL2RB	22	22:37559825	37559825	G	1.249	0.2653	1.681	0.1622	1.113	0.6669
IL2RB	22	22:37560104	37560104	A	1.126	0.6142	0.7873	0.5115	1.498	0.1909
IL2RB	22	22:37560170	37560170	G	1.006	0.9696	1.195	0.5214	0.9119	0.6531
IL2RB	22	22:37560437	37560437	G	0.8377	0.5069	0.8761	0.7451	0.8541	0.6632
IL2RB	22	22:37560592	37560592	T	1.108	0.417	0.938	0.7523	1.23	0.2023
IL2RB	22	22:37560667	37560667	G	0.8208	0.602	0.865	0.8473	0.8224	0.6605
IL2RB	22	22:37560751	37560751	T	0.9517	0.6488	0.7372	0.08329	0.879	0.3662
IL2RB	22	22:37561721	37561721	C	1.187	0.2491	1.278	0.3264	1.161	0.4337
WNT5A	3	3:55511675	55511675	C	1.033	0.7778	1.277	0.1899	0.9249	0.6065
WNT5A	3	3:55514123	55514123	C	0.699	0.4658	0.2539	0.06226	1.522	0.5198
WNT5A	3	3:55519857	55519857	T	0.8895	0.4349	0.8317	0.4571	0.8907	0.5466
WNT5A	3	3:55523392	55523392	G	0.7678	0.4592	1.14	0.8092	0.5196	0.2185
NAA60	16	16:3509056	3509056	A	0.9146	0.488	0.9418	0.7747	0.8858	0.4682
NAA60	16	16:3510737	3510737	A	1.068	0.5805	1.011	0.9558	1.133	0.4118
NAA60	16	16:3512760	3512760	G	0.967	0.8291	1.135	0.6101	0.8824	0.548
NAA60	16	16:3520515	3520515	C	1.146	0.3764	1.234	0.3927	1.111	0.5974
[truncated: 918 more rows]
